# Supplementary material for: A golden opportunity: benzofuranone modifications of aurones and their influence on optical properties, toxicity, and potential as dyes
Source: publisher site journal article supplement (doi:10.3762/bjoc.15.171), 2019-07-25
Supplement: Additional file 1 [file 1860-5397-15-171-S1.pdf]

## Supporting Information

for

### **A golden opportunity: benzofuranone modifications of aurones and their influence on optical properties, toxicity, and potential as dyes**

Joza Schmitt and Scott T. Handy

*Beilstein J. Org. Chem.* **2019**, *15*, 1781–1785. [doi:10.3762/bjoc.15.171](https://doi.org/10.3762/bjoc.15.171)

### **Experimental methods and spectra for all new compounds**

## **Table of contents**

|                              |         |
|------------------------------|---------|
| Synthetic methods            | S2–S3   |
| Characterization for aurones | S3–S10  |
| UV–vis procedure             | S10     |
| Cytotoxicity procedure       | S10–S11 |
| Dyeing procedure             | S11–S12 |
| References                   | S12     |
| Copies of NMR and MS spectra | S13–S63 |

## **Instrumentation**

The structures of the newly synthesized aurones were determined by NMR (JEOL ECA-500 and ECX-300) and GC–MS (Shimadzu QP2010S). UV-Vis analyses were performed on an HP 8452A Diode Array spectrophotometer. Spectrometry results from MTT assay were analyzed using Molecular Devices SpectraMax M5 Multi-Mode Microplate Reader.

## **General procedure for the condensation of non-hydroxy-substituted benzofuranones**

In a round bottom flask, 1 mmol of the appropriate benzofuranone was mixed with 2 mmol of *p*-tolualdehyde in approximately 3.5 g of neutral alumina and 5 mL of dichloromethane. The reaction was stirred at room temperature for 24 hours. The alumina was filtered out and the mixture concentrated *in vacuo*. Two equivalents of isonicotinic acid hydrazide was added to the concentrated mixture in 5 mL/mmol of both dichloromethane and dimethylformamide and left to stir at room temperature for another 24 hours to remove any excess aldehyde. In some cases, further purification methods were used and/or the ratio of the hydrazide scavenger and the solvents were changed to increase the scavenger's effectiveness after air exposure. Exceptions are noted below. The aurone product was extracted using a mixture of ethyl acetate and 1M HCl except where noted. The organic layer was concentrated and subjected to NMR and GC/MS analysis for purity.

## **General synthetic procedure for hydroxyl-substituted benzofuranones**

In a round bottom flask, 1 mmol of the appropriate benzofuranone was mixed with 2 mmol of *p*-tolualdehyde in 1.5 g/mmol of 1:1 (w:w) KOH/H<sub>2</sub>O and 5 mL/mmol methanol. The mixture was left to stir for 6 hours at room temperature. The mixture was triturated with 1 M HCl until acidic and precipitates formed. The crystals were filtered out and washed with 100% hexane followed by 25% EtOAc in hexane. Finally, 50% EtOAc in hexane was used as a final wash. The product was analyzed via NMR and GC/MS.

**2-(4-Methylbenzylidene)-1-(benzofuran-3-one) [1]:** used 4 equivalents of the hydrazide scavenger and 5 mL/0.5 mmol of DCM and DMF to produce 0.15 g (62%) of the desired product as a pale yellow solid (mp = 97-99 °C). <sup>1</sup>H NMR (500 MHz, CDCl<sub>3</sub>): δ= 2.29 (s, 3H), 6.76 (s, 1H), 7.08 (t, J=7.4 Hz, 1H), 7.13 (d, J=8.4 Hz, 2H), 7.19 (d, J=8.6 Hz, 1H), 7.51 (t, J=8.6 Hz, 1H), 7.68 (d, J=8.4 Hz, 3H); <sup>13</sup>C NMR (125 MHz, CDCl<sub>3</sub>): δ= 21.67, 112.93, 113.27, 121.74, 123.34, 124.48, 129.53, 129.70 (2C), 131.62 (2C), 136.68, 140.43, 146.47, 165.91, 184.51; GC RT: (24.81 minutes); MS (200 °C, 70 eV): 236 (M<sup>+</sup>, 95.1), 235 (96.3), 221 (100.0), 92 (46.7), 76 (58.6).

**2-(4-Methylbenzylidene)-1-(5'-fluorobenzofuran-3-one) [2]:** purified via column chromatography using silica gel and 10:90 EtOAc/hexane as eluent followed by extraction in 1M HCl and EtOAc to give 0.15 g (59%) of the product as a pale yellow solid (mp = 122-124 °C). <sup>1</sup>H NMR (500 MHz, CDCl<sub>3</sub>): δ= 2.41 (s, 3H), 6.91 (s, 1H), 7.26 (d, J=8.2 Hz, 2H), 7.30 (dd, J=8.6, 3.4 Hz, 1H), 7.36 (td, J=8.6, 2.3 Hz, 1H), 7.45 (dd, J=6.3, 2.8 Hz, 1H), 7.80 (d, J=5.8 Hz, 2H); <sup>13</sup>C NMR (125 MHz,

CDCl<sub>3</sub>):  $\delta$ = 21.69, 109.91 (d,  $J$ =95 Hz), 114.07 (d,  $J$ =33 Hz), 114.21, 122.39 (d,  $J$ =33 Hz), 123.93 (d,  $J$ =104 Hz), 129.47 (d,  $J$ =248 Hz), 129.77 (2C), 131.74 (2C), 140.85, 147.03, 157.78, 161.90, 183.86; GC RT: (24.00 minutes); MS (200 °C, 70 eV): 254 (M<sup>+</sup>, 47.9), 253 (49.0), 239 (100.0), 126 (53.9), 115 (41.7).

**2-(4-Methylbenzylidene)-1-(6'-fluorobenzofuran-3-one) [3]:** a new batch of the hydrazide scavenger was reintroduced after column chromatography giving 0.1 g (39%) of the product as a pale yellow solid (mp = 172-174 °C). <sup>1</sup>H NMR (500 MHz, CDCl<sub>3</sub>):  $\delta$ = 2.40 (s, 3H), 6.87 (s, 1H), 6.90 (td,  $J$ =14.9, 3.4 Hz, 1H), 7.0 (dd,  $J$ =14.3, 3.4 Hz, 1H), 7.25 (d,  $J$ =13.2 Hz, 2H), 7.77 (d,  $J$ =13.2 Hz, 2H), 7.80 (d,  $J$ =13.8 Hz, 1H); <sup>13</sup>C NMR (125 MHz, CDCl<sub>3</sub>):  $\delta$ = 21.74, 100.77(d,  $J$ =104 Hz), 111.86 (d,  $J$ =95 Hz), 113.75, 118.47, 126.45 (d,  $J$ =48 Hz), 129.55 (d,  $J$ =286 Hz), 129.83 (2C), 131.70 (2C), 140.83, 146.89, 167.14 (d,  $J$ =33 Hz), 169.25, 182.97; GC RT: (23.88 minutes); MS (200 °C, 70 eV): 254 (M<sup>+</sup>, 56.3), 253 (65.4), 239 (100.0), 126 (61.2), 115 (50.6).

**2-(4-Methylbenzylidene)-1-(4'-chlorobenzofuran-3-one) [4]:** required 4 equivalents of the hydrazide scavenger and 5 mL/0.5 mmol of DCM and DMF to yield 0.2 g (74%) of the desired product as a pale yellow solid (mp = 172-173 °C). <sup>1</sup>H NMR (500 MHz, CDCl<sub>3</sub>):  $\delta$ = 2.33 (s, 3H), 6.77 (s, 1H), 7.04 (d,  $J$ =8.0 Hz, 1H), 7.12 (d,  $J$ =8.0 Hz, 1H), 7.15 (d,  $J$ =8.0 Hz, 2H), 7.43 (t,  $J$ =8.0 Hz, 1H), 7.67 (d,  $J$ =8.1 Hz, 2H); <sup>13</sup>C NMR (125 MHz, CDCl<sub>3</sub>):  $\delta$ = 21.75, 111.39, 113.95, 119.03, 124.56, 129.24, 129.79 (2C), 131.69 (2C), 132.27, 136.76, 140.83,

146.11, 166.43, 181.77; GC RT: (26.50 minutes); MS (200 °C, 70 eV): 272 (M+2, 12.2), 270 (M<sup>+</sup>, 34.2), 269 (40.3), 257 (31.1), 255 (100.0), 134 (58.7), 115 (53.5).

**2-(4-Methylbenzylidene)-1-(5'-chlorobenzofuran-3-one) [5]:** another 2

equivalents of the hydrazide scavenger were reintroduced in 5 mL/mmol DCM and DMF to yield 0.2 g (72%) of the desired product as a pale yellow solid (mp = 143-146 °C). <sup>1</sup>H NMR (500 MHz, CDCl<sub>3</sub>): δ= 2.39 (s, 3H), 6.86 (s, 1H), 7.23 (d, J=6.8 Hz, 2H), 7.55 (dd, J=8.6, 2.3 Hz, 1H), 7.71 (d, J=2.3 Hz, 1H), 7.75 (d, J=8.0 Hz, 2H); <sup>13</sup>C NMR (125 MHz, CDCl<sub>3</sub>): δ= 21.76, 114.25, 114.41, 122.91, 124.09, 129.06, 129.17, 129.79 (2C), 131.78 (2C), 136.40, 140.98, 146.57, 164.05, 183.21; GC RT: (25.93 minutes); MS (200 °C, 70 eV): 272 (M+2, 14.2), 270 (M<sup>+</sup>, 43.9), 269 (44.6), 257 (33.8), 255 (100.0), 134 (59.6), 115 (76.4).

**2-(4-Methylbenzylidene)-1-(6'-chlorobenzofuran-3-one) [6]:** another 2

equivalents of the hydrazide scavenger were reintroduced in 5 mL/mmol DCM and DMF to yield 0.19 g (70%) of the product as a pale yellow solid (mp = 165-166 °C). <sup>1</sup>H NMR (500 MHz, CDCl<sub>3</sub>): δ= 2.37 (s, 3H), 6.83 (s, 1H), 7.13 (dd, J=8.1, 1.7 Hz, 1H), 7.21 (d, J=8.0 Hz, 2H), 7.29 (s, 1H), 7.66 (d, J=8.2 Hz, 1H), 7.72 (d, J=8.6 Hz, 2H); <sup>13</sup>C NMR (125 MHz, CDCl<sub>3</sub>): δ= 21.76, 113.65, 114.23, 120.48, 124.30, 125.38, 129.24, 129.84 (2C), 131.75 (2C), 140.94, 142.72, 146.59, 166.06, 183.21; GC RT: (25.81 minutes); MS (200 °C, 70 eV): 272 (M+2, 15.3), 270 (M<sup>+</sup>, 46.0), 269 (46.3), 257 (31.3), 255 (100.0), 134 (63.5), 115 (79.4).

**2-(4-Methylbenzylidene)-1-(7'-chlorobenzofuran-3-one) [7]:** another 2 equivalents of the hydrazide scavenger were reintroduced in 5 mL/mmol DCM and DMF to yield 0.14 g (50%) of the product as a pale yellow solid (mp = 172-174 °C). <sup>1</sup>H NMR (500 MHz, CDCl<sub>3</sub>): δ= 2.37 (s, 3H), 6.90 (s, 1H), 7.11 (t, *J*=7.7 Hz, 1H), 7.23 (d, *J*=8.0 Hz, 2H), 7.59 (d, *J*=7.4 Hz, 1H), 7.65 (d, *J*=7.4 Hz, 1H), 7.80 (d, *J*=8.1 Hz, 2H); <sup>13</sup>C NMR (125 MHz, CDCl<sub>3</sub>): δ= 21.80, 115.01, 118.62, 122.86, 123.65, 124.14, 129.17, 129.93 (2C), 132.02 (2C), 136.34, 141.16, 146.26, 161.53, 183.79; GC RT: (25.54 minutes); MS (200 °C, 70 eV): 272 (M+2, 16.6), 270 (M<sup>+</sup>, 47.8), 269 (45.0), 257 (33.5), 255 (100.0), 134 (63.7), 115 (81.1).

**2-(4-Methylbenzylidene)-1-(5'-bromobenzofuran-3-one) [8]:** another 2 equivalents of the hydrazide scavenger were reintroduced in 5 mL/mmol DCM and DMF to yield 0.15 g (42%) of the desired product as a pale yellow solid (mp = 154-155 °C). <sup>1</sup>H NMR (500 MHz, CDCl<sub>3</sub>): δ= 2.41 (s, 3H), 6.90 (s, 1H), 7.23 (d, *J*=8.6 Hz, 1H), 7.25 (d, *J*=8.2 Hz, 2H), 7.71 (dd, *J*=8.6, 1.7 Hz, 1H), 7.78 (d, *J*=8.6 Hz, 2H), 7.90 (d, *J*=2.3 Hz, 1H); <sup>13</sup>C NMR (125 MHz, CDCl<sub>3</sub>): δ= 21.63, 114.42, 114.57, 116.14, 123.36, 127.14, 129.04, 129.69 (2C), 131.66 (2C), 139.07, 140.91, 146.29, 164.41, 183.03; GC RT: (26.89 minutes); MS (200 °C, 70 eV): 316 ([M+2-1]<sup>+</sup>, 31.8), 315 (M<sup>+</sup>, 34.5), 314 ([M-1]<sup>+</sup>, 32.4), 301 (69.9), 299 (74.2), 115 (100.0), 91 (14.8).

**2-(4-Methylbenzylidene)-1-(6'-bromobenzofuran-3-one) [9]:** scavenger was reintroduced three times to produce 0.26 g (83%) of the desired product as a

pale yellow solid (mp = 157-158 °C). <sup>1</sup>H NMR (500 MHz, CDCl<sub>3</sub>): δ= 2.37 (s, 3H), 6.84 (s, 1H), 7.20 (d, *J*=8.1 Hz, 2H), 7.29 (d, *J*=8.0 Hz, 1H), 7.47 (s, 1H), 7.59 (d, *J*=8.0 Hz, 1H), 7.72 (d, *J*=8.2 Hz, 2H); <sup>13</sup>C NMR (125 MHz, CDCl<sub>3</sub>): δ= 21.79, 114.30, 116.64, 120.86, 125.47, 127.11, 129.25, 129.85 (2C), 131.15, 131.77 (2C), 140.96, 146.45, 165.96, 183.36; GC RT: (26.79 minutes); MS (200 °C, 70 eV): 316 ([M+2-1]<sup>+</sup>, 29.3), 315 (M<sup>+</sup>, 35.2), 314 ([M-1]<sup>+</sup>, 30.2), 301 (53.6), 299 (58.9), 115 (100.0), 91 (16.8).

**2-(4-Methylbenzylidene)-1-(7'-bromobenzofuran-3-one) [10]:** scavenger was reintroduced two times to yield 0.18 g (53%) of the product as a pale yellow solid (mp = 187-192 °C). <sup>1</sup>H NMR (500 MHz, CDCl<sub>3</sub>): δ= 2.40 (s, 3H), 6.93 (s, 1H), 7.08 (t, *J*=7.7 Hz, 1H), 7.26 (d, *J*=8.0 Hz, 2H), 7.72 (d, *J*=8.2 Hz, 1H), 7.77 (d, *J*=8.1 Hz, 1H), 7.84 (d, *J*=8.0 Hz, 2H); <sup>13</sup>C NMR (125 MHz, CDCl<sub>3</sub>): δ= 21.66, 106.08, 114.85, 123.39, 124.43, 129.06, 129.81 (2C), 131.91 (2C), 139.11, 141.02, 146.15, 162.75, 183.85; GC RT: (26.41 minutes); MS (200 °C, 70 eV): 316 ([M+2-1]<sup>+</sup>, 37.5), 315 (M<sup>+</sup>, 38.2), 314 ([M-1]<sup>+</sup>, 38.6), 301 (72.2), 299 (75.4), 115 (79.6), 91 (25.2).

**2-(4-Methylbenzylidene)-1-(5'-methylbenzofuran-3-one) [11]:** scavenger was reintroduced one more time to produce 0.14 g (56%) of the desired product as a pale yellow solid (mp = 117-119 °C). <sup>1</sup>H NMR (300 MHz, CDCl<sub>3</sub>): δ= 2.37 (s, 3H), 2.38 (s, 3H), 6.83 (s, 1H), 7.17 (d, *J*=8.6 Hz, 1H), 7.22 (d, *J*=7.9 Hz, 2H), 7.41 (d, *J*=8.6 Hz, 1H), 7.55 (s, 1H), 7.77 (d, *J*=7.9 Hz, 2H); <sup>13</sup>C NMR (125 MHz, CDCl<sub>3</sub>):

$\delta$  = 20.84, 21.71, 112.54, 113.04, 121.67, 124.20, 129.67, 129.73 (2C), 131.60 (2C), 133.09, 137.91, 140.39, 146.97, 164.51, 184.83; GC RT: (25.50 minutes); MS (200 °C, 70 eV): 250 ( $M^+$ , 69.2), 249 (74.0), 235 (100), 134 (54.5), 124 (77.5), 89 (60.2).

**2-(4-Methylbenzylidene)-1-(5',6'-dimethylbenzofuran-3-one) [12]:** another 2 equivalents of the hydrazide scavenger were reintroduced in 5 mL/mmol DCM and DMF to yield 0.11 g (40%) of the product as a pale yellow solid (mp = 181-183 °C).  $^1\text{H}$  NMR (500 MHz,  $\text{CDCl}_3$ ):  $\delta$  = 2.22 (s, 3H), 2.31 (s, 3H), 2.36 (s, 3H), 6.76 (s, 1H), 7.03 (s, 1H), 7.20 (d,  $J$ =8.0 Hz, 2H), 7.45 (s, 1H), 7.73 (d,  $J$ =8.1 Hz, 2H);  $^{13}\text{C}$  NMR (125 MHz,  $\text{CDCl}_3$ ):  $\delta$  = 19.28, 21.30, 21.48, 112.23, 113.18, 119.33, 124.16, 129.48 (2C), 129.59, 131.26 (2C), 132.01, 139.95, 146.93, 147.59, 164.98, 184.27; GC RT: (27.00 minutes); MS (200 °C, 70 eV): 264 ( $M^+$ , 68.2), 263 (84.2), 249 (91.45), 148 (42.3), 131 (55.9), 117 (53.7), 91 (100.0).

**2-(4-Methylbenzylidene)-1-(7'-methylbenzofuran-3-one) [13]:** 0.13 g (52%) yield as a pale yellow solid (mp = 107-108 °C).  $^1\text{H}$  NMR (500 MHz,  $\text{CDCl}_3$ ):  $\delta$  = 2.37 (s, 3H), 2.44 (s, 3H), 6.83 (s, 1H), 7.05 (t,  $J$ =7.4 Hz, 1H), 7.22 (d,  $J$ =8.0 Hz, 2H), 7.39 (d,  $J$ =6.9 Hz, 1H), 7.58 (d,  $J$ =8.0 Hz, 1H), 7.76 (d,  $J$ =8.0 Hz, 2H);  $^{13}\text{C}$  NMR (125 MHz,  $\text{CDCl}_3$ ):  $\delta$  = 14.38, 21.72, 113.11, 121.26, 121.90, 122.97, 123.29, 128.74 (3C- two are coincident), 131.62 (2C), 137.60, 140.42, 146.74, 164.79, 185.20; GC RT: (25.08 minutes); MS (200 °C, 70 eV): 250 ( $M^+$ , 58.9), 249 (66.0), 235 (100), 124 (61.0), 106 (70.0), 89 (59.3).

**2-(4-Methylbenzylidene)-1-(6'-hydroxybenzofuran-3-one) [14]:** 0.05 g (20%)

yield as an off-white solid (mp > 210 °C). <sup>1</sup>H NMR (500 MHz, (CD<sub>3</sub>)<sub>2</sub>CO): δ= 2.36 (s, 3H), 6.68 (s, 1H), 6.76 (dd, J=8.6, 2.3 Hz, 1H), 6.82 (d, J=1.7 Hz, 1H), 7.28 (d, J=8.0 Hz, 2H), 7.60 (d, J=8.0 Hz, 1H), 7.83 (d, J=8.6 Hz, 2H); <sup>13</sup>C NMR (125 MHz, (CD<sub>3</sub>)<sub>2</sub>CO): δ= 20.67, 98.79, 110.41, 112.82, 113.96, 125.79, 129.65 (2C), 129.88, 131.22 (2C), 139.93, 147.49, 166.08, 168.39, 181.58; GC RT: (28.08 minutes); MS (200 °C, 70 eV): 252 (M<sup>+</sup>, 58.5), 251 (54.8), 63 (76.1), 44 (100.0).

**2-(4-Methylbenzylidene)-1-(4'-hydroxybenzofuran-3-one) [15]:** 0.04 g (15%)

yield, as a pale yellow solid (mp = 156-158 °C). <sup>1</sup>H NMR (500 MHz, CDCl<sub>3</sub>): δ= 2.41 (s, 3H), 6.61 (d, J=8.1 Hz, 1H), 6.79 (d, J=8.1 Hz, 1H), 6.83 (s, 1H), 7.25 (d, J=7.4 Hz, 2H), 7.49 (t, J=8.3 Hz, 1H), 7.80 (d, J=8.0 Hz, 2H), 7.83 (x, 1H, OH); <sup>13</sup>C NMR (125 MHz, CDCl<sub>3</sub>): δ= 21.77, 103.71, 109.77, 109.81, 113.59, 129.32, 129.85 (2C), 131.75 (2C), 139.19, 140.89, 146.28, 156.72, 164.90, 185.75; GC RT: (25.09 minutes); MS (200 °C, 70 eV): 252 (M<sup>+</sup>, 98.7), 251 (77.8), 237 (100.0).

**2-(4-Methylbenzylidene)-1-(6'-hydroxy-4'-methylbenzofuran-3-one) [16]:**

0.03 g (11%) yield as a pale yellow solid (mp >210 °C). <sup>1</sup>H NMR (500 MHz, CDCl<sub>3</sub>): δ= 2.39 (s, 3H), 2.62 (s, 3H), 6.44 (s, 1H), 6.57 (s, 1H), 6.75 (s, 1H), 7.23 (d, J=8.2 Hz, 2H), 7.76 (d, J=8.6 Hz, 2H); <sup>13</sup>C NMR (500 MHz, (CD<sub>3</sub>)<sub>2</sub>CO): δ= 16.98, 20.66, 96.34, 109.58, 112.35, 113.43, 129.61 (2C), 130.01, 131.08 (2C), 139.67, 141.38, 147.65, 165.36, 168.61, 182.43; GC RT: (28.46 minutes); MS

(200 °C, 70 eV): 266 ( $M^+$ , 72.7), 265 (100.0), 251 (70.7), 132 (82.9), 77 (90.0), 51 (84.9).

**2-(4-Methylbenzylidene)-1-(6'-hydroxy-7'-methylbenzofuran-3-one) [17]:**

0.05 g (19%) yield as a pale yellow solid (mp >210 °C).  $^1\text{H}$  NMR (500 MHz,  $(\text{CD}_3)_2\text{CO}$ ):  $\delta$ = 2.25 (s, 3H), 2.43 (s, 3H), 6.42 (d,  $J$ =2.3 Hz, 1H), 6.52 (s, 1H), 6.52 (d,  $J$ =1.7 Hz, 1H), 7.17 (d,  $J$ =7.4 Hz, 2H), 7.71 (d,  $J$ =8.1 Hz, 2H);  $^{13}\text{C}$  NMR (125 MHz,  $(\text{CD}_3)_2\text{CO}$ ):  $\delta$ = 16.96, 20.65, 96.33, 109.55, 112.36, 113.43, 129.62 (2C), 130.02, 131.08 (2C), 139.67, 141.37, 148.57, 165.39, 168.49, 182.42; GC RT: (28.34 minutes); MS (200 °C, 70 eV): 266 ( $M^+$ , 31.9), 265 (48.9), 251 (43.6), 77 (53.6), 44 (100.0).

**General procedure for UV-vis spectroscopy**

Stock solutions ranging from 87  $\mu\text{M}$  to 134  $\mu\text{M}$  of the aurones were made by dissolving a known mass of the aurones in acetonitrile. Each stock solution was used for subsequent dilutions to achieve a final concentration ranging from 1.5  $\mu\text{M}$  to 3.3  $\mu\text{M}$ . Using five different known concentration points for each aurone, the molar extinction coefficient was determined by measurement of the absorbance at the  $\lambda_{\text{max}}$  closest to the visible range. The absorbance measurement of the highest concentration point was used for the absorbance shift study. 2-(4-methylbenzylidene)-1-(6'-hydroxy-7'-methylbenzofuran-3-one (**17**) was the exception as the exact concentration of the solution could not be determined due to its poor solubility in acetonitrile.

## **Hep G2 cytotoxicity assay**

Hep G2 human liver cancer cells were cultured in phenol red Dulbecco's Modified Eagle Medium (DMEM) with 10% fetal bovine serum (FBS) and 1% Pen-strep (PSG) under 37°C and 5% CO<sub>2</sub> atmospheric conditions. The cells were washed with phosphate buffered saline (PBS) and diluted with phenol red free DMEM to a concentration between 200,000 to 250,000 cells/mL. The cells were distributed in a 96-well plate with each well containing 100 µL of the cell solution and were allowed to settle for 2 hours in the incubator. The cells were then treated with 200 µM of the aurones in DMSO and the known dyes in 10:90 (v:v) DMSO/ultrapure water in triplicates and were left in the incubator for 3 days. The vehicles were used as the negative controls (DMSO for the aurones and 10:90 DMSO:ultrapure water for the known dyes). 20 µL of 5 mg/mL MTT (3-(4,5-dimethylthiazol-2-yl)-2,5-diphenyltetrazolium bromide) was added to each well containing treated cells after the 3-day incubation period and was allowed to settle in the incubator for 3.5 more hours. Finally, the media was removed from the wells and replaced by 100 µL of DMSO to lyse the cells and dissolve the formazan crystals that were formed. The absorbance was then recorded on the SpectraMax M5 Multi-Mode Microplate Reader. The procedure was repeated two more times using different batches of cultured Hep G2 cells on different days.

## **Dyeing and mordanting processes [1]**

Multi-fiber fabric (Kimble 43, 13 fabric strip) was washed with warm water first then air dried. Mordanting solutions with FeSO<sub>4</sub> were made fresh at 1 g/25 mL of deionized H<sub>2</sub>O for both the pre-mordanting and post-mordanting processes. Both (9) (2-

(4-methylbenzylidene)-1-(7'-bromobenzofuran-3-one)) and (**14**) (2-(4-methylbenzylidene)-1-(4'-hydroxybenzofuran-3-one)) were used as the dye samples with each undergoing pre, simultaneous, and post-mordanting processes.

## References

1. Praveena, R.; Deepa, V.; Sivakumar, R. Investigations on C-glycosyl flavonoids from *Rhynchosia capitata*, its antimicrobial and dyeing properties. *Fibers Polym.* **2014**, *15*, 525-533.

2-(4-methylbenzylidene)-1-(5'-fluorobenzofuran-3-one) [2]







Spectrum

Line#:1 R.Time:23.975(Scan#:3996)  
MassPeaks:188  
RawMode:Single 23.975(3996) BasePeak:239 10(1431148)  
BG Mode:None Group 1 - Event 1 Scan



## 2-(4-methylbenzylidene)-1-(6'-fluorobenzofuran-3-one) [3]





JS\_SF\_CARBON-5.jdf  
Sample\_id = JS\_SF  
Experiment = single\_pulse\_dec  
Solvent = CHLOROFORM-D  
Revolution\_time = 10.5311  
Current\_time = 18-JAN-2018 07:26:26  
Current\_time = 18-JAN-2018 07:26:49  
Data\_format = 1D COMPLEX  
Date\_acq = 18-JAN-2018  
Dim\_units = [ppm]  
Dimensions = X  
Site = ECA 500  
Spectrometer = JEOL-500  
Field\_strength = 11.7473579 [T] (500 [MHZ])  
X\_acq\_duration = 0.83361792 [s]  
X\_offset = 125.76529768 [MHz]  
X\_points = 32768  
X\_prescans = 1  
X\_sweep = 1.19959034 [Hz]  
X\_resolution = 39.3081761 [kHz]  
Irr\_domain = 1H  
Irr\_freq = 500.15991521 [MHz]  
Irr\_offset = 125.76529768 [MHz]  
Mod\_return = FALSE  
Total\_scans = 420  
X\_90\_width = 10.239 [us]  
X\_acq\_time = 0.83361792 [s]  
X\_angle = 30 [deg]  
X\_pulse = 3.413 [us]  
Irr\_atn\_dec = 21.5 [dB]  
Irr\_atn\_noe = 21.5 [dB]  
X\_resolution = 39.3081761 [kHz]  
Decoupling = WALTZ  
Initial\_wait = 118  
Noe\_time = TRUE  
Noe\_delay = 2 [s]  
Relaxation\_delay = 2 [s]  
Repetition\_time = 2.83361792 [s]  
Temp\_get = 21.4 [degC]



C:\Sync\Shimadzu GCMS\Documents\Handy\Schnitt\6F.qgd



Spectrum

Line#: 1 R.Time: 23.865 (Scan#: 3974)  
MassPeaks: 197  
RawMode: Single 23.865 (3974) BasePeak: 239.05 (2166300)  
BG Mode: None Group 1 - Event 1 Scan





**JEOL**





C:\Sync\ShimadzuGCMS\Documents\Handy\Schmitt\4Cl.qgd



Line#1 R.Time:26.495(Scan#:4500)  
MassPeaks:156  
RawMode:Single 26.495(4500) BasePeak:255.15(221250)  
BG Mode:None Group 1 - Event 1 Scan



2-(4-methylbenzylidene)-1-(5'-chlorobenzofuran-3-one) [5]





C:\Sync\Shimadzu\GCMS\Documents\Handy\Schmitt\SCI.qgd



Spectrum

Line#1 R.Time:25.910(Scan#:4383)

MassPeaks:128

RawMode:Single 25.910(4383) BasePeak:255.10(111482)

BG Mode:None Group 1 - Event 1 Scan





|                  |                             |
|------------------|-----------------------------|
| Filename         | = JS_SCL_PROTON-15_jd1      |
| Author           | = Handy                     |
| Experiment       | = single_pulse_eh2          |
| Sample_id        | = SCL                       |
| Sample_name      | = SCL-PROTON-D              |
| Creation time    | = 26-JUN-2017 13:07:10      |
| Revision time    | = 19-JAN-2018 07:44:42      |
| Current time     | = 19-JAN-2018 07:44:49      |
| Comment          | = cmnr                      |
| Data format      | = 1D COMPLEX                |
| Dim size         | = 13107                     |
| Dim title        | = 1H                        |
| Dimensions       | = X [ppm]                   |
| Site             | = EKA 500                   |
| Spectrometer     | = DELTA500                  |
| Acq duration     | = 11.7473579 [s] (500 [MHz] |
| X domain         | = 1.74507904 [s]            |
| X freq           | = 500.15991521 [MHz]        |
| X fref           | = 500.15991521 [MHz]        |
| X points         | = 16384                     |
| X prescans       | = 1                         |
| X resolution     | = 0.57227773 [Hz]           |
| X rdomain        | = 1.74507904 [MHz]          |
| Irq freq         | = 5.0 [Dpm]                 |
| Irq offset       | = 500.15991521 [MHz]        |
| Trf domain       | = 5.0 [Dpm]                 |
| Trf offset       | = 500.15991521 [MHz]        |
| Clipped          | = 5.0 [Dpm]                 |
| Mod return       | = FALSE                     |
| Total scans      | = 16                        |
| X 90 width       | = 14.19 [us]                |
| X 90 time        | = 1.74507904 [s]            |
| X angle          | = 45 [deg]                  |
| X attn           | = 4 [db]                    |
| X pulse          | = 7.095 [us]                |
| Irq mode         | = OFF                       |
| Distance preset  | = FALSE                     |
| Initial wait     | = 1 [s]                     |
| Relax gain       | = 38                        |
| Relaxation delay | = 5.74507904 [s]            |
| Relaxation time  | = 5.74507904 [s]            |
| Temp get         | = 27 [C]                    |





C:\Syn\ShimadzuGCMS\Documents\Hindy\Schmitt\6C1.qgd



Spectrum

Line#:1 R Time:25.800(Scan#:4361)  
MassPeaks:147  
RawMode:Single 25.800(4361) BasePeak:255.10(150625)  
BG Mode:None Group 1 - Event 1 Scan



## 2-(4-methylbenzylidene)-1-(7'-chlorobenzofuran-3-one) [7]





Filename = US\_7C1\_CARBON-6.jdf  
Date\_ = 18-JAN-2018 09:36:22  
Experiment = single\_pulse\_dec  
Sample\_id = US\_7C1  
Solvent = CHLOROFORM-D  
Acq\_time = 18-JAN-2018 09:35:45  
Revision\_time = 18-JAN-2018 09:35:45  
Current\_time = 18-JAN-2018 09:36:22  
Comment =  
Data\_format = 2D COMPLEX  
Data\_size = 26214  
Dim\_title = 13C  
Dim\_units = [ppm]  
Dimensions = 1  
Size = ECA 500  
Spectrometer = DELTA2 NMR  
Yield\_strength = 11.747359 [T] (500 [MH]  
X\_acq\_time = 0.3361792 [s]  
X\_domain = 13C  
X\_freq = 125.76529768 [MHz]  
X\_offset = 100 [ppm]  
X\_resolution = 4  
X\_sweep = 1.19959034 [Hz]  
X\_domain = 39.3081761 [MHz]  
X\_offset = 500.15891521 [MHz]  
X\_resolution = 5.0 [ppm]  
Mod\_return = FALSE  
Total\_scans = 1  
X\_90\_width = 10.239 [us]  
X\_acq\_time = 0.3361792 [s]  
X\_delay = 90 [us]  
X\_atn = 9 [dB]  
X\_pulse = 3.413 [us]  
X\_atn\_dec = 21.5 [dB]  
X\_atn\_inc = 21.5 [dB]  
X\_atn\_iso = 21.5 [dB]  
Decoupling = TRUE  
Initial\_wait = 1 [s]  
Recvr\_gain = 20 [dB]  
Relaxation\_delay = 2 [s]  
Repetition\_time = 2.3361792 [s]  
Temp\_get = 21.3 [C]



C:\Sync\ShimadzuGCMS\Documents\Handy\Schmitt\7Cl.qgd



Spectrum

Line#:1 R.Time:25.530(Scan#:4307)  
MassPeaks:145  
RawMode:Single 25.530(4307) BasePeak:255.15(158383)  
BG Mode:None Group 1 - Event 1 Scan



2-(4-methylbenzylidene)-1-(5'-bromobenzofuran-3-one) [8]





C:\Sync\Shimadzu\GCMS\Documents\Handy\Schmitt\5Br.qgd



Spectrum

Line#:1 R.Time:26.900(Scan#:4581)  
MassPeaks:82  
RawMode:Single 26.900(4581) BasePeak:63.00(16604)  
BG Mode:None Group 1 - Event 1 Scan



2-(4-methylbenzylidene)-1-(6'-bromobenzofuran-3-one) [9]





C:\Syne\ShimadzuGCMS\Documents\Handy\Schmitt\6Br.qgd



Spectrum

Line#:1 R.Time:26.765(Scan#:4554)  
MassPeaks:127  
RawMode:Single 26.765(4554) BasePeak:75.05(71248)  
BG Mode:None Group 1 - Event 1 Scan



2-(4-methylbenzylidene)-1-(7'-bromobenzofuran-3-one) [10]





Filename = JS-7Br\_CARBON-2.jdf  
Author = Randy  
Experiment = pulse\_dec  
Sample\_id = JS-7Br  
Solvent = CHLOROFORM-D  
Creation\_time = 19-JUL-2017 14:48:15  
Acquisition\_time = 19-JUL-2017 15:17:18  
Current\_time = 19-JUL-2017 15:07:26  
Comment = C13C  
Data\_format = 1D COMPLEX  
Dim\_1 = 64  
Dim\_2 = 13C  
Dim\_units = [ppm]  
Dimensions = X  
Site = XA 500  
Spectrometer = ECP32\_NMR  
Field\_strength = 11.7473579[G] (500[MH  
X\_acq\_duration = 0.83361792[s]  
X\_acq\_time = 0.83361792[s]  
X\_freq = 125.76529768[MHz]  
X\_offset = 100[ppm]  
X\_points = 32768  
X\_resolution = 1.19959034[Hz]  
X\_sweep = 39.3081761[MHz]  
X\_domain = 1H  
X\_freq = 500.15991521[MHz]  
X\_offset = 0[ppm]  
Clipped = TRUE  
Mod\_return = 1  
Scans = 337  
Total\_scans = 337  
X\_90\_width = 10.239[us]  
X\_acq\_time = 0.83361792[s]  
X\_angle = 30[deg]  
X\_pulse = 3.413[us]  
Irr\_atn\_dec = 21.5[db]  
Irr\_atn\_noe = 21.5[db]  
Decoupling = TRUE  
Initial\_wait = 1[s]  
Nuc = 13C  
Nuc\_freq = 125.76529768[MHz]  
Repetitions = 20  
Relaxation\_delay = 2[s]  
Repetition\_time = 2.83361792[s]  
Temp\_get = 21.3[deg]

C:\Sync\ShimadzuGCMS\Documents\Handy\Schmitt\7Br.qgd



Spectrum

Line1:1 R.Time:26.405(Scan#:4482)  
MassPeaks:157  
RawMode:Single 26.405(4482) BasePeak:75.05(158668)  
BG Mode:None Group 1 - Event 1 Scan



2-(4-methylbenzylidene)-1-(5'-methylbenzofuran-3-one) [**11**]



C:\Sync\ShimadzuGCMS\Documents\Handy\Schmitt\5Me.qgd



Spectrum

Line#:1 R.Time:25.505(Scan#:4302)  
MassPeaks:105  
RawMode:Single 25.505(4302) BasePeak:235.20(73345)  
BG Mode:None Group 1 - Event 1 Scan



2-(4-methylbenzylidene)-1-(5',6'-dimethylbenzofuran-3-one) [12]





```

J5 = J5_6MHz_CARBON-2.3
Filesource
= Handy
Experiment
= single_pulse_dec
Sample_id
= J5_5_6MHz
Solvent
= CHLOROFORM-d
Time
= 12.04:07
Revision_time
= 20-YUG-2017 12:23:17
Current_time
= 20-YUG-2017 12:23:17
Data_format
= 1D_COMPLEX
Dim_size
= 262144
Fid
= 133C
Dimensions
= [ppm]
Dim0_units
= X
Dim1_units
= X
Spectrometer
= DELTA2X_NMR
Freq
= 18.7493579[7] (500[MH
Acq_duration
= 0.83361792[s]
Sweep_start_freq
= 125.76529768[MHz]
Sweep_end_freq
= 125.76529768[MHz]
X_freq
= 100[ppm]
Y_points
= 3768
Z_points
= 1
Prescans
= 1
Prg_name
= 13959034[Huz]
X_sweep
= 39.3081761[kHz]
Irz_domain
= 1H
Irr_freq
= 500.15991521[MHz]
Clamp_level
= 0.00[ppm]
Clipped_wet
= FALSE
Mod_return
= 1
Scans
= 131
Total_scans
= 131
X30_width
= 10.239[us]
X_acq_time
= 0.83361792[s]
X_angle
= 30[deg]
X_atn
= 9[db]
Xir_atn_dec
= 21.5[db]
Xir_atn_poc
= 21.5[db]
Xir_noise
= WAUTZ
Decoupling
= 1UPUR
Nucleus1_name
= TRUE
Nuc1_gamma
= 2[S]
Recvr_gain
= 60
Temp
= 22.4[degC]
Repetition_time
= 22.4[degC]
Reset_time
= 22.4[degC]

```

C:\Sync\ShimadzuGCMS\Documents\Handy\Schmitt\5,6 dMe.qgd



Spectrum

Line#:1 R Time:27.015(Scan#:4604)  
MassPeaks:64  
RawMode:Single 27.015(4604) BasePeak:91.10(23252)  
BG Mode:None Group 1 - Event 1 Scan



2-(4-methylbenzylidene)-1-(7'-methylbenzofuran-3-one) [**13**]



C:\Sync\ShimadzuGCMS\Documents\Handy\Schmitt\7Me.gpd



Spectrum

Line#:1 R.Time:25.080(Scan#:4217)  
MassPeaks:135  
RawMode:Single 25.080(4217) BasePeak:235.10(206370)  
BG Mode:None Group 1 - Event 1 Scan



2-(4-methylbenzylidene)-1-(6'-hydroxybenzofuran-3-one) [**14**]



C:\Sync\Shimadzu\GCMS\Documents\Fandy\Schmitt\6011.qgd



Spectrum

Line#:1 R.Time:28.090(Scan#:4819)  
MassPeaks:27  
RawMode:Single 28.090(4819) BasePeak 44.05(5186)  
BG Mode:None Group 1 - Event 1 Scan



2-(4-methylbenzylidene)-1-(4'-hydroxybenzofuran-3-one) [15]





C:\Sync\Shimadzu\GCMS\Documents\Handy\Schmitt\0401001.qgd



Spectrum

Line#:1 R.Time:25.035(Scan#:4208)  
MassPeaks:95  
RawMode:Single 25.035(4208) BasePeak:236.90(38782)  
BG Mode:None Group 1 - Event 1 Scan



# JOE





C:\Syne\ShimadzuGCMS\Documents\Handy\Schmitt\6OH4Me.qgd



Spectrum

Line#:1 R.Time:28.475(Scan#:4896)  
MassPeaks:32  
RawMode:Single 28.475(4896) BasePeak:44.05(5575)  
BG Mode:None Group 1 - Event 1 Scan



[illegible]



C:\Syne\Shimadzu\GCMS\Documents\Handy\Schmitt\6OH7Me.qgd



Spectrum

Line#:1 R.Time:28.360(Scan#:4873)  
MassPeaks:36  
RawMode:Single 28.360(4873) BasePeak:44.05(9778)  
BG Mode:None Group I - Event I Scan



## S61





C:\Sync\ShimadzuGCMS\Documents\Handy\Schmitt\no sub in DCM.qgd



Spectrum

Line#:1 R.Time:24.745(Scan#:4150)  
MassPeaks:185  
RawMode:Single 24.745(4150) BasePeak:220.95(8428992)  
BG Mode:None Group 1 - Event 1 Scan
