# Supplementary material for: A golden opportunity: benzofuranone modifications of aurones and their influence on optical properties, toxicity, and potential as dyes
Source: Beilstein J Org Chem. 2019 Jul 25;15:1781–5. doi: 10.3762/bjoc.15.171 (PMC6664396; doi:10.3762/bjoc.15.171)
Supplement: File 2 — Absorption data and individual plots for all compounds. [file Beilstein_J_Org_Chem-15-1781-s002.xlsx]

## Sheet: Aurone Data
Prod. ID	Compound I.D.	Structure	M.W.	Theoretical Yield (g)	Actual Yield (g)	% Yield	MP
JS101	5F	C16H11FO2	254.26	0.2538	0.15	59.1017	121-126
JS102	6F	C16H11FO2	254.26	0.2538	0.1	39.4012	174-177
JS103	4Cl	C16H11ClO2	270.712	0.271386	0.2	73.6956	169-172
JS104	5Cl	C16H11ClO2	270.712	0.27781	0.2	71.9917	143-146
JS105	6Cl	C16H11ClO2	270.712	0.271386	0.19	70.0109	164-168
JS106	7Cl	C16H11ClO2	270.712	0.281021	0.14	49.8183	165-176
JS107	5Br	C16H11BrO2	315.166	0.355067	0.15	42.2456	152-157
JS108	6Br	C16H11BrO2	315.166	0.315122	0.26	82.5078	157-160
JS109	7Br	C16H11BrO2	315.166	0.340272	0.18	52.8988	194-200
JS110	5Me	C17H14O2	250.297	0.250246	0.14	55.9449	115-117
JS111	5,6dMe	C18H16O2	264.324	0.274063	0.11	40.1368	181-184
JS112	7Me	C17H14O2	250.297	0.250246	0.13	51.9488	105-108
JS201	6OH	C16H12O3	252.269	0.252	0.05	19.8413	272-279
JS203	6OH4Me	C17H14O3	266.296	0.270903	0.03	11.0741	256-259
JS204	6OH7Me	C17H14O3	266.296	0.267659	0.05	18.6805	>380
JS202	4OH		252.269	0.25872	0.04	15.4607	171-172
	unsub		236.27	0.242312	0.15	61.9036	94-101

## Sheet: Aurone & Dye Tox 
		Triplicate 1	Rep 1	Rep 2	Rep 3	Average	St. Dev.	% Inhibition	95% Confidence	Lower Interval	Upper Interval		Plate 1
		4-Chloro	1.3497	1.5594	1.4753	1.46147	0.105532	0.247249	0.119419	0.18574	0.308757	0.84097		1	2	3	4	5	6	7	8	9	10	11	12
		5-Chloro	0.5978	0.4702	0.5268	0.5316	0.0639353	0.726191	0.0723483	0.688927	0.763455	0.60677	24.6	0.1305	0.1313	0.1294	0.1756	0.2534	0.2305	0.234	0.2507	0.2026	0.1325	0.1204	0.1155
		6-Chloro	1.3362	1.5592	1.7834	1.5596	0.2236	0.196704	0.253023	0.0663802	0.327027	0.83156	4Cl	0.1524	1.3497	1.5594	1.4753	1.5093	1.4764	1.3679	1.4224	1.2631	1.3447	1.9549	0.1304
		7-Chloro	1.8599	1.5851	1.9711	1.80537	0.198694	0.0701176	0.22484	-0.0456896	0.185925	0.904237	5Cl	0.1674	0.5978	0.4702	0.5268	0.5059	0.4884	0.5852	0.4302	0.9575	0.4807	1.9709	0.1759
		5-Bromo	0.6755	0.6863	0.6565	0.672767	0.0150869	0.653481	0.0170721	0.644688	0.662274	0.658885	6Cl	0.1252	0.9677	1.2798	1.3166	1.3362	1.5592	1.7834	1.3991	1.3224	1.4819	1.8987	0.1873
		6-Bromo	0.348	0.4282	0.5414	0.4392	0.0971681	0.773783	0.109954	0.71715	0.830417	0.572281	7Cl	0.1285	1.8599	1.5851	1.9711	1.4997	1.6037	1.6276	1.3054	1.4598	1.5687	2.1646	0.1557
		Vehicle	1.9549	1.9709	1.8987	1.9415	0.0379194	0	0.042909	-0.022101	0.022101		5Br	0.154	0.9217	0.9239	0.7885	0.6874	0.7632	0.9238	0.6755	0.6863	0.6565	1.8791	0.1724
		5-Fluoro	0.2321	0.2059	0.1871	0.208367	0.0226012	0.903518	0.0255752	0.891675	0.91536		6Br	0.1579	0.348	0.4282	0.5414	0.4035	0.4115	0.5422	0.4013	0.8958	0.342	1.987	0.1848
		6-Fluoro	2.0297	2.0485	2.0354	2.03787	0.00963967	0.056383	0.0109081	0.0513321	0.0614339			0.2023	0.1898	0.1712	0.1857	0.1605	0.1698	0.1704	0.1726	0.1994	0.2023	0.1827	0.131
		7-Bromo	2.1466	1.8158	1.9878	1.9834	0.165444	0.0816034	0.187214	-0.00508448	0.168291
		5-Methyl	0.4556	0.4358	0.4206	0.437333	0.0175503	0.797496	0.0198597	0.788301	0.806692		Plate 2
		5,6-Dimethyl	1.5028	1.5071	1.4877	1.4992	0.0101887	0.305808	0.0115294	0.300469	0.311147		Temperature(¡C)	1	2	3	4	5	6	7	8	9	10	11	12
		7-Methyl	0.212	0.249	0.1952	0.218733	0.0275248	0.898717	0.0311466	0.884295	0.91314		24.5	0.1106	0.1665	0.1306	0.1413	0.1584	0.1482	0.1612	0.1538	0.1325	0.1365	0.1665	0.1164
		Vehicle	2.0187	2.1939	2.2663	2.15963	0.127307	0	0.144059	-0.0667052	0.0667052		7Br	0.1485	1.7811	2.1466	2.1663	1.9878	1.8158	1.3387	1.8718	2.2802	1.8469	2.0187	0.1362
		unsub	0.2042	0.221	0.2211	0.215433	0.00972848	0.88027	0.0110086	0.874152	0.886389		5F	0.1409	0.2321	0.2059	0.1871	0.1857	0.2267	0.201	0.1935	0.1903	0.2084	2.1939	0.1414
		vehicle	1.8008	1.8245	1.7727	1.79933	0.0259311	0	0.0293433	-0.0163079	0.0163079		6F	0.1493	2.3151	2.0297	2.0485	2.2132	2.3423	2.3617	1.7597	2.0354	1.966	2.2663	0.1401
		4-Hydroxy	0.9923	0.7855	0.6539	0.810567	0.170587	0.62561	0.193034	0.53645	0.71477		5Me	0.151	0.4467	0.4186	0.4456	0.4154	0.4728	0.4556	0.4358	0.4206	0.7829	2.404	0.1346
		6-Hydroxy	0.8573	0.908	0.8177	0.861	0.0452636	0.602316	0.0512196	0.578658	0.625973		5,6 dMe	0.1506	1.4425	1.4686	1.7713	1.4283	1.5028	1.5071	1.4877	2.0281	1.4562	2.3876	0.1215
		6-Hydroxy-4-Methyl	0.6352	0.3861	0.4492	0.490167	0.129504	0.773599	0.146545	0.705911	0.841286		7Me	0.1417	0.2085	0.2181	0.2196	0.2296	0.212	0.249	0.1952	0.2118	0.2107	2.5645	0.1518
		6-Hydroxy-7-Methyl	0.366	0.3623	0.7132	0.4805	0.201533	0.778063	0.228051	0.67273	0.883397			0.1234	0.1368	0.1428	0.1395	0.1453	0.1515	0.1487	0.1451	0.1485	0.1622	0.1503	0.111
		Tartrazine	2.1183	1.8457	1.575	1.84633	0.271651	0.147203	0.307396	0.00522122	0.289185
		Alizarin Y	3.3243	3.5365	2.9115	3.25743	0.31782	-0.504565	0.359641	-0.670678	-0.338452		Plate 3
		Vehicle	2.2108	2.1671	2.1172	2.16503	0.0468342	0	0.0529969	-0.0244786	0.0244786		Temperature(¡C)	1	2	3	4	5	6	7	8	9	10	11	12
													22.7	0.1431	0.1298	0.1268	0.1339	0.3453	0.1279	0.1342	0.1284	0.1355	0.1214	0.1415	0.1259
		Triplicate 2	Rep 1	Rep 2	Rep 3	Average	St. Dev.	% Inhibition	95% Confidence	Lower Interval	Upper Interval		Tart	0.1319	1.8986	1.9447	2.1598	2.1183	1.8457	1.575	1.8697	1.7267	1.7943	2.2108	0.1299
		4-Chloro	1.0198	1.1752	1.1425	1.1125	0.0819286	0.0719112	0.0927092	-0.00543021	0.149253		Aliz	0.1307	3.3243	3.5365	2.9115	2.9043	2.8721	2.6477	2.99	3.189	3.0779	2.1671	0.1319
		5-Chloro	0.4784	0.4245	0.4188	0.440567	0.0328883	0.632463	0.037216	0.601416	0.66351		4OH	0.1353	0.9923	0.7855	0.6539	0.7984	0.5783	0.6252	0.5974	0.71	0.9017	2.1172	0.1427
		6-Chloro	0.6808	0.7818	0.8996	0.7874	0.109507	0.343122	0.123917	0.239746	0.446498		6OH7Me	0.1553	0.366	0.3623	0.7132	0.2275	0.4344	0.2266	0.1809	0.2221	0.2132	2.0761	0.1417
		7-Chloro	1.1815	1.2535	1.2969	1.24397	0.0582877	-0.0377631	0.0659575	-0.0927873	0.0172611		6OH	0.1279	0.8573	0.908	0.8177	1.4036	0.6948	0.9724	0.5129	0.5054	0.8105	2.6144	0.1476
		5-Bromo	0.7632	0.7448	0.7537	0.7539	0.00920163	0.371069	0.0104124	0.362382	0.379755		6OH4Me	0.123	0.6352	0.3861	0.4492	0.3678	0.6345	0.4381	0.402	0.4297	0.4553	2.2853	0.1329
		6-Bromo	0.3204	0.3399	0.3286	0.329633	0.00979098	0.725008	0.0110793	0.715765	0.73425			0.1288	1.9955	2.0013	2.0002	0.1446	0.1365	0.1346	0.1404	0.1417	0.1067	0.1196	0.1231
		Vehicle	1.1567	1.1961	1.2433	1.1987	0.0433585	0	0.0490639	-0.0409309	0.0409309
		5-Fluoro	0.2164	0.2215	0.2176	0.2185	0.00266646	0.817719	0.00301733	0.815202	0.820236		Average % Inhibition	Lower	Upper		Lower	Upper	% Inhibition T1	Lower2	Upper2	% Inhibition T2	Lower3	Upper3	% Inhibition T3
		6-Fluoro	1.0582	1.0674	0.9898	1.03847	0.0423969	0.133673	0.0479757	0.0936495	0.173696		4-Chloro	0.0574517	0.0574517	0.151346	0.18574	0.308757	0.247249	-0.00543021	0.149253	0.0719112	0.101373	0.168384	0.134878
		7-Bromo	1.1046	1.2608	1.295	1.22013	0.101506	-0.0178805	0.114862	-0.113703	0.0779418		5-Chloro	0.0276508	0.0276508	0.72682	0.688927	0.763455	0.726191	0.601416	0.66351	0.632463	0.807166	0.836449	0.821807
		5-Methyl	0.311	0.2971	0.2833	0.297133	0.01385	0.75212	0.0156725	0.739046	0.765195		6-Chloro	0.187678	0.187678	0.25072	0.0663802	0.327027	0.196704	0.239746	0.446498	0.343122	-0.117001	0.541671	0.212335
		5,6-Dimethyl	0.9584	0.9186	0.8982	0.925067	0.0306166	0.228275	0.0346453	0.199373	0.257177		7-Chloro	0.0763112	0.0763112	0.0364329	-0.0456896	0.185925	0.0701176	-0.0927873	0.0172611	-0.0377631	0.0188419	0.135046	0.0769441
		7-Methyl	0.1799	0.2299	0.2347	0.214833	0.0303482	0.820778	0.0343416	0.792129	0.849427		5-Bromo	0.0125068	0.0125068	0.593539	0.644688	0.662274	0.653481	0.362382	0.379755	0.371069	0.736027	0.776108	0.756068
		4-Hydroxy	0.6665	0.7246	0.7429	0.711333	0.0398904	0.406579	0.0451394	0.368922	0.444236		6-Bromo	0.0384345	0.0384345	0.752189	0.71715	0.830417	0.773783	0.715765	0.73425	0.725008	0.708348	0.807203	0.757776
		6-Hydroxy	0.5018	0.6105	0.5754	0.562567	0.0554747	0.530686	0.0627744	0.478317	0.583055
		6-Hydroxy-4-Methyl	0.5842	0.432	0.6318	0.549333	0.104364	0.541726	0.118096	0.443205	0.640246
		6-Hydroxy-7-Methyl	0.2637	0.3471	0.2986	0.303133	0.0418844	0.747115	0.0473958	0.707576	0.786654		5-Fluoro	0.00558487	0.00558487	0.870056	0.891675	0.91536	0.903518	0.815202	0.820236	0.817719	0.886536	0.891326	0.888931
		unsub	0.2473	0.227	0.2014	0.225233	0.0230009	0.812102	0.0260275	0.790389	0.833815		6-Fluoro	0.0339149	0.0339149	0.0352216	0.0513321	0.0614339	0.056383	0.0936495	0.173696	0.133673	-0.141062	-0.0277201	-0.0843909
													7-Bromo	0.111153	0.111153	0.0585146	-0.00508448	0.168291	0.0816034	-0.113703	0.0779418	-0.0178805	-0.0391276	0.262769	0.111821
		Tartrazine	1.7521	1.7219	1.6856	1.71987	0.0332966	0.0379624	0.037678	0.0168866	0.0590382		5-Methyl	0.0137541	0.0137541	0.80879	0.788301	0.806692	0.797496	0.739046	0.765195	0.75212	0.857761	0.895745	0.876753
		Alizarin Y	2.8153	3.0999	2.6968	2.87067	0.207175	-0.605758	0.234436	-0.736894	-0.474622		5,6-Dimethyl	0.0223284	0.0223284	0.249495	0.300469	0.311147	0.305808	0.199373	0.257177	0.228275	0.181657	0.247146	0.214402
		Vehicle	1.8092	1.7109	1.8431	1.78773	0.0686646	0	0.0776998	-0.0434628	0.0434628		7-Methyl	0.0161107	0.0161107	0.875351	0.884295	0.91314	0.898717	0.792129	0.849427	0.820778	0.901296	0.911818	0.906557
		Triplicate 3	Rep 1	Rep 2	Rep 3	Average	St. Dev.	% Inhibition	95% Confidence	Upper Interval	Lower Interval
		4-Chloro	1.6744	1.6389	1.7519	1.6884	0.0577862	0.134878	0.0653901	0.101373	0.168384		4-Hydroxy	0.0465428	0.0465428	0.540434	0.53645	0.71477	0.62561	0.368922	0.444236	0.406579	0.576302	0.601925	0.589113
		5-Chloro	0.3474	0.3732	0.3227	0.347767	0.025252	0.821807	0.0285748	0.807166	0.836449		6-Hydroxy	0.0304411	0.0304411	0.667897	0.578658	0.625973	0.602316	0.478317	0.583055	0.530686	0.855393	0.885986	0.87069
		6-Chloro	1.2748	1.1479	2.189	1.53723	0.568002	0.212335	0.642742	-0.117001	0.541671		6-Hydroxy-4-Methyl	0.0605543	0.0605543	0.677574	0.705911	0.841286	0.773599	0.443205	0.640246	0.541726	0.701944	0.732854	0.717399
		7-Chloro	1.8152	1.8941	1.6951	1.80147	0.100208	0.0769441	0.113394	0.0188419	0.135046		6-Hydroxy-7-Methyl	0.0711124	0.0711124	0.78575	0.67273	0.883397	0.778063	0.707576	0.786654	0.747115	0.763608	0.900536	0.832072
		5-Bromo	0.4468	0.4672	0.5142	0.476067	0.0345638	0.756068	0.0391119	0.736027	0.776108		unsub	0.0108584	0.0108584	0.86274	0.874152	0.886389	0.88027	0.790389	0.833815	0.812102	0.891104	0.900592	0.895848
		6-Bromo	0.565	0.4563	0.3969	0.472733	0.0852464	0.757776	0.0964636	0.708348	0.807203		Tartrazine	0.0762127	0.0762127	0.0681386	0.00522122	0.289185	0.147203	0.0168866	0.0590382	0.0379624	-0.0463302	0.0848302	0.01925
		Vehicle	1.9417	1.8539	2.0593	1.95163	0.10306	0	0.116621	-0.0597555	0.0597555		Alizarin Y	0.148644	0.148644	-0.544455	-0.670678	-0.338452	-0.504565	-0.736894	-0.474622	-0.605758	-0.671725	-0.374358	-0.523042
		5-Fluoro	0.2193	0.219	0.212	0.216767	0.00413078	0.888931	0.00467433	0.886536	0.891326
		6-Fluoro	2.2253	2.0873	2.0364	2.11633	0.0977395	-0.0843909	0.110601	-0.141062	-0.0277201
		7-Bromo	1.9488	1.4441	1.8073	1.7334	0.260339	0.111821	0.294596	-0.0391276	0.262769		Plate 4
		5-Methyl	0.2336	0.2118	0.2762	0.240533	0.0327551	0.876753	0.0370651	0.857761	0.895745		Temperature(¡C)	1	2	3	4	5	6	7	8	9	10	11	12
		5,6-Dimethyl	1.5979	1.4938	1.5079	1.5332	0.0564736	0.214402	0.0639047	0.181657	0.247146		23.2	0.111	0.1571	0.1325	0.2279	0.3612	0.1262	0.1736	0.4158	0.1281	0.1243	0.1235	0.1104
		7-Methyl	0.1872	0.1719	0.188	0.182367	0.00907322	0.906557	0.0102671	0.901296	0.911818		5f,6f,4cl	0.1351	0.2164	0.2215	0.2176	1.0582	1.0674	0.9898	1.0198	1.1752	1.1425	1.1567	0.135
		4-Hydroxy	0.7824	0.7974	0.8259	0.8019	0.0220964	0.589113	0.0250039	0.576302	0.601925		5cl,6cl,7cl	0.1388	0.4784	0.4245	0.4188	0.6808	0.7818	0.8996	1.1815	1.2535	1.2969	1.1961	0.1356
		6-Hydroxy	0.2242	0.2765	0.2564	0.252367	0.0263823	0.87069	0.0298538	0.855393	0.885986		5br,6br,7br	0.1305	0.7632	0.7448	0.7537	0.3204	0.3399	0.3286	1.1046	1.2608	1.295	1.2433	0.134
		6-Hydroxy-4-Methyl	0.5445	0.5291	0.581	0.551533	0.0266553	0.717399	0.0301627	0.701944	0.732854		5me,5,6dme,7me	0.1386	0.311	0.2971	0.2833	0.9584	0.9186	0.8982	0.1799	0.2299	0.2347	1.3914	0.1228
		6-Hydroxy-7-Methyl	0.4618	0.2392	0.2822	0.327733	0.118079	0.832072	0.133617	0.763608	0.900536		6oh, 4oh,6o4m	0.1216	0.5018	0.6105	0.5754	0.6665	0.7246	0.7429	0.5842	0.432	0.6318	1.3102	0.1509
		unsub	0.1945	0.2107	0.2046	0.203267	0.00818189	0.895848	0.00925851	0.891104	0.900592		6o7m,unsub	0.1339	0.2637	0.3471	0.2986	0.2473	0.227	0.2014	0.1374	0.1399	0.1429	1.2333	0.1265
														0.1146	0.1302	0.1374	0.1306	0.1356	0.1361	0.1282	0.1233	0.1219	0.1227	0.122	0.1114
		Tartrazine	1.4657	1.5972	1.6447	1.5692	0.0927267	0.01925	0.104928	-0.0463302	0.0848302
		Alizarin Y	2.6683	2.2577	2.3846	2.43687	0.210231	-0.523042	0.237894	-0.671725	-0.374358		Plate 5
		Vehicle	1.6402	1.5045	1.6553	1.6	0.0830493	0	0.0939774	-0.0587359	0.0587359		Temperature(¡C)	1	2	3	4	5	6	7	8	9	10	11	12
													23.2	0.1147	0.1782	0.521	0.1233	0.1711	0.132	0.1353	0.1066	0.1078	0.1021	0.1103	0.1018
													tartrazine,alizarin, unsub	0.1329	1.7521	1.7219	1.6856	2.8153	3.0999	2.6968	0.2469	0.221	0.2211	1.8008	0.1154
														0.1332	1.8092	1.7109	1.8431	2.0968	2.0687	2.0455	0.1629	0.1536	0.1556	1.8245	0.1231
														0.1319	0.1494	0.1868	0.1776	0.1529	0.1621	0.1623	0.1809	0.1864	0.2051	1.7727	0.1184
														0.1671	0.1604	0.1638	0.203	0.1801	0.1786	0.1712	0.1732	0.1776	0.1849	0.2088	0.1131
														0.1461	0.1772	0.1791	0.1854	0.1871	0.1757	0.1761	0.1772	0.1834	0.1256	0.198	0.1268
														0.154	0.2084	0.1934	0.1754	0.1809	0.1859	0.1811	0.1836	0.1997	0.1977	0.2025	0.1139
														0.1195	0.145	0.1097	0.1446	0.1548	0.1124	0.1083	0.1118	0.1212	0.1391	0.1126	0.1157
													Plate 6
													Temperature(¡C)	1	2	3	4	5	6	7	8	9	10	11	12
													23	0.1237	0.1276	0.1246	0.1278	0.1296	0.128	0.1333	0.1291	0.1316	0.1372	0.1352	0.1145
													5f,6f,4cl	0.133	0.2193	0.219	0.212	2.2253	2.0873	2.0364	1.6744	1.6389	1.7519	1.9417	0.121
													5cl,6cl,7cl	0.1372	0.3474	0.3732	0.3227	1.2748	1.1479	2.189	1.8152	1.8941	1.6951	1.8539	0.1327
													5br,6br,7br	0.1395	0.4468	0.4672	0.5142	0.565	0.4563	0.3969	1.9488	1.4441	1.8073	2.0593	0.1279
													5me,5,6dme,7me	0.1419	0.2336	0.2118	0.2762	1.5979	1.4938	1.5079	0.1872	0.1719	0.188	2.152	0.1251
													6oh, 4oh,6o4m	0.1436	0.2242	0.2765	0.2564	0.7824	0.7974	0.8259	0.5445	0.5291	0.581	2.138	0.1238
													6o7m,unsub	0.1323	0.4618	0.2392	0.2822	0.1945	0.2107	0.2046	0.1513	0.1575	0.1471	2.0928	0.114
														0.1133	0.1267	0.1234	0.129	0.1189	0.1264	0.122	0.1241	0.1287	0.1267	0.1216	0.1181
													Plate 7
													Temperature(¡C)	1	2	3	4	5	6	7	8	9	10	11	12
													23	0.1136	0.1236	0.1295	0.1341	0.123	0.1198	0.1577	0.1249	0.1188	0.1208	0.1135	0.1073
													tartrazine,alizarin, unsub	0.1429	1.4657	1.5972	1.6447	2.6683	2.2577	2.3846	0.2042	0.486	0.1701	0.1283	0.1063
														0.1422	1.6402	1.5045	1.6553	1.7113	1.7184	1.7901	0.1503	0.1431	0.1373	0.1611	0.1011
														0.1265	2.2648	1.8965	1.8518	0.1538	0.1383	0.1374	0.1301	0.131	0.143	0.1298	0.1079
														0.1255	0.4834	0.7105	0.7263	0.7741	0.3363	0.3865	0.5183	0.701	0.4355	1.1933	0.1035
														0.1767	0.3552	0.6719	0.574	0.147	0.1347	0.1311	0.1367	0.13	0.1383	1.3872	0.1065
														0.1092	0.1433	0.1495	0.1424	0.1631	0.1719	0.1712	0.1654	0.1588	0.1333	1.47	0.1086
														0.1238	0.1723	0.1731	0.1642	0.1599	0.1566	0.1479	0.1152	0.1219	0.123	0.1037	0.1016

## Sheet: %error calc
alpha	0.05				4-Chloro	0.151346
stdev	0.11				5-Chloro	0.72682
n	3				6-Chloro	0.25072
sample mean	1.46				7-Chloro	0.0364329
					5-Bromo	0.593539
0.124474					6-Bromo	0.752189
0.124474
					5-Fluoro	0.870056
					6-Fluoro	0.0352216
					7-Bromo	0.0585146
					5-Methyl	0.80879
					5,6-Dimethyl	0.249495
					7-Methyl	0.875351
					4-Hydroxy	0.540434
					6-Hydroxy	0.667897
					6-Hydroxy-4-Methyl	0.677574
					6-Hydroxy-7-Methyl	0.78575
					unsub	0.86274
					Tartrazine	0.0681386
					Alizarin Y	-0.544455

## Sheet: All New UVresults
	Instrument: HP Diode Array	Instrument: HP Diode Array	Instrument: HP Diode Array	Instrument: HP Diode Array	Instrument: HP Diode Array	Instrument: HP Diode Array	Instrument: HP Diode Array	Instrument: HP Diode Array	Instrument: HP Diode Array	Instrument: HP Diode Array	Instrument: HP Diode Array	Instrument: HP Diode Array	Instrument: HP Diode Array	Instrument: HP Diode Array	Instrument: HP Diode Array	Instrument: HP Diode Array	Instrument: HP Diode Array
	Collection mode: Scan	Collection mode: Scan	Collection mode: Scan	Collection mode: Scan	Collection mode: Scan	Collection mode: Scan	Collection mode: Scan	Collection mode: Scan	Collection mode: Scan	Collection mode: Scan	Collection mode: Scan	Collection mode: Scan	Collection mode: Scan	Collection mode: Scan	Collection mode: Scan	Collection mode: Scan	Collection mode: Scan
	Number of points: 255	Number of points: 255	Number of points: 255	Number of points: 255	Number of points: 255	Number of points: 255	Number of points: 255	Number of points: 255	Number of points: 255	Number of points: 255	Number of points: 255	Number of points: 255	Number of points: 255	Number of points: 255	Number of points: 255	Number of points: 255	Number of points: 255
	Monochromator = 190 to 700 nm	Monochromator = 190 to 700 nm	Monochromator = 190 to 700 nm	Monochromator = 190 to 700 nm	Monochromator = 190 to 700 nm	Monochromator = 190 to 700 nm	Monochromator = 190 to 700 nm	Monochromator = 190 to 700 nm	Monochromator = 190 to 700 nm	Monochromator = 190 to 700 nm	Monochromator = 190 to 700 nm	Monochromator = 190 to 700 nm	Monochromator = 190 to 700 nm	Monochromator = 190 to 700 nm	Monochromator = 190 to 700 nm	Monochromator = 190 to 700 nm	Monochromator = 190 to 700 nm
	Timing mode: Constant Time	Timing mode: Constant Time	Timing mode: Constant Time	Timing mode: Constant Time	Timing mode: Constant Time	Timing mode: Constant Time	Timing mode: Constant Time	Timing mode: Constant Time	Timing mode: Constant Time	Timing mode: Constant Time	Timing mode: Constant Time	Timing mode: Constant Time	Timing mode: Constant Time	Timing mode: Constant Time	Timing mode: Constant Time	Timing mode: Constant Time	Timing mode: Constant Time
	Integration Time: 2.5 sec.	Integration Time: 2.5 sec.	Integration Time: 2.5 sec.	Integration Time: 2.5 sec.	Integration Time: 2.5 sec.	Integration Time: 2.5 sec.	Integration Time: 2.5 sec.	Integration Time: 2.5 sec.	Integration Time: 2.5 sec.	Integration Time: 2.5 sec.	Integration Time: 2.5 sec.	Integration Time: 2.5 sec.	Integration Time: 2.5 sec.	Integration Time: 2.5 sec.	Integration Time: 2.5 sec.	Integration Time: 2.5 sec.	Integration Time: 2.5 sec.
	Apply Reference: True	Apply Reference: True	Apply Reference: True	Apply Reference: True	Apply Reference: True	Apply Reference: True	Apply Reference: True	Apply Reference: True	Apply Reference: True	Apply Reference: True	Apply Reference: True	Apply Reference: True	Apply Reference: True	Apply Reference: True	Apply Reference: True	Apply Reference: True	Apply Reference: True
	Active DCDevices: HPDA (red)	Active DCDevices: HPDA (red)	Active DCDevices: HPDA (red)	Active DCDevices: HPDA (red)	Active DCDevices: HPDA (red)	Active DCDevices: HPDA (red)	Active DCDevices: HPDA (red)	Active DCDevices: HPDA (red)	Active DCDevices: HPDA (red)	Active DCDevices: HPDA (red)	Active DCDevices: HPDA (red)	Active DCDevices: HPDA (red)	Active DCDevices: HPDA (red)	Active DCDevices: HPDA (red)	Active DCDevices: HPDA (red)	Active DCDevices: HPDA (red)	Active DCDevices: HPDA (red)
	Reduction mode: Absorbance	Reduction mode: Absorbance	Reduction mode: Absorbance	Reduction mode: Absorbance	Reduction mode: Absorbance	Reduction mode: Absorbance	Reduction mode: Absorbance	Reduction mode: Absorbance	Reduction mode: Absorbance	Reduction mode: Absorbance	Reduction mode: Absorbance	Reduction mode: Absorbance	Reduction mode: Absorbance	Reduction mode: Absorbance	Reduction mode: Absorbance	Reduction mode: Absorbance	Reduction mode: Absorbance
	Scan mode: Fixed Slitwidth and HV(s)	Scan mode: Fixed Slitwidth and HV(s)	Scan mode: Fixed Slitwidth and HV(s)	Scan mode: Fixed Slitwidth and HV(s)	Scan mode: Fixed Slitwidth and HV(s)	Scan mode: Fixed Slitwidth and HV(s)	Scan mode: Fixed Slitwidth and HV(s)	Scan mode: Fixed Slitwidth and HV(s)	Scan mode: Fixed Slitwidth and HV(s)	Scan mode: Fixed Slitwidth and HV(s)	Scan mode: Fixed Slitwidth and HV(s)	Scan mode: Fixed Slitwidth and HV(s)	Scan mode: Fixed Slitwidth and HV(s)	Scan mode: Fixed Slitwidth and HV(s)	Scan mode: Fixed Slitwidth and HV(s)	Scan mode: Fixed Slitwidth and HV(s)	Scan mode: Fixed Slitwidth and HV(s)
	(HPDA, Slit width = _______ mm (manual))	(HPDA, Slit width = _______ mm (manual))	(HPDA, Slit width = _______ mm (manual))	(HPDA, Slit width = _______ mm (manual))	(HPDA, Slit width = _______ mm (manual))	(HPDA, Slit width = _______ mm (manual))	(HPDA, Slit width = _______ mm (manual))	(HPDA, Slit width = _______ mm (manual))	(HPDA, Slit width = _______ mm (manual))	(HPDA, Slit width = _______ mm (manual))	(HPDA, Slit width = _______ mm (manual))	(HPDA, Slit width = _______ mm (manual))	(HPDA, Slit width = _______ mm (manual))	(HPDA, Slit width = _______ mm (manual))	(HPDA, Slit width = _______ mm (manual))	(HPDA, Slit width = _______ mm (manual))	(HPDA, Slit width = _______ mm (manual))
	Total Elapsed Time = 0:03.9 (min:sec)	Total Elapsed Time = 0:03.9 (min:sec)	Total Elapsed Time = 0:03.9 (min:sec)	Total Elapsed Time = 0:03.9 (min:sec)	Total Elapsed Time = 0:03.9 (min:sec)	Total Elapsed Time = 0:03.9 (min:sec)	Total Elapsed Time = 0:03.9 (min:sec)	Total Elapsed Time = 0:03.9 (min:sec)	Total Elapsed Time = 0:03.9 (min:sec)	Total Elapsed Time = 0:04.0 (min:sec)	Total Elapsed Time = 0:03.9 (min:sec)	Total Elapsed Time = 0:03.9 (min:sec)	Total Elapsed Time = 0:03.9 (min:sec)	Total Elapsed Time = 0:03.9 (min:sec)	Total Elapsed Time = 0:03.9 (min:sec)	Total Elapsed Time = 0:03.9 (min:sec)	Total Elapsed Time = 0:03.9 (min:sec)
Wavelength	4Cl	5Cl	6Cl	7Cl	5F	6F	5Br	6Br	7Br	5Me	5,6 dMe	7Me	4OH	6OH	6OH4Me	6OH7Me	unsub
190	0.105667	0.226685	0.0613556	0.169037	0.234116	0.0453949	0.168182	0.207794	0.204819	0.142014	0.0733795	0.075882	0.118683	0.0101624	0.0244446	-0.0128222	1.47118
192	0.752838	0.819962	0.40181	0.737946	0.787216	0.703613	0.661179	0.744995	0.743805	0.711548	0.760635	0.67746	0.191391	0.649704	0.665863	0.389867	1.55634
194	0.836578	0.904053	0.0793152	0.851776	0.884628	0.809998	0.726715	0.841919	0.884033	0.745407	0.84465	0.709091	-0.0093689	0.790451	0.759003	0.58913	2.3958
196	1.10399	1.13716	0.665756	1.11655	1.17937	1.08574	0.976028	1.12474	1.17683	1.06747	1.15199	1.04063	0.531631	0.859406	1.07779	0.635015	1.98669
198	1.10274	1.08897	0.459	1.10846	1.1636	1.0706	0.989471	1.07246	1.15874	0.99205	1.10065	0.98732	0.00260925	1.06641	1.03827	0.577567	2.63919
200	1.1176	1.19359	0.697983	1.21844	1.25562	1.07922	0.982788	1.15051	1.29874	1.06331	1.10855	0.923218	0.534119	0.738037	1.14862	0.483183	2.157
202	1.3614	1.33366	0.861053	1.25443	1.2961	1.3349	1.24614	1.19257	1.24373	1.27003	1.39108	1.2812	0.0206757	0.979065	1.29962	0.386702	3.00697
204	0.991669	1.07718	0.642395	1.20705	1.22194	0.955399	0.841568	1.04976	1.30316	0.917709	0.92836	0.797363	0.54686	0.638824	1.04538	0.34094	2.35785
206	1.15303	1.31566	0.837433	1.47169	1.51173	1.0788	0.928284	1.30417	1.43082	1.11023	1.02336	0.940201	0.433777	0.695236	1.32025	0.269804	3.0802
208	0.801331	0.872437	0.543579	1.03395	0.950256	0.721268	0.671158	0.841507	1.14511	0.721527	0.706436	0.66124	0.497681	0.548096	0.847946	0.255247	2.30661
210	0.803497	0.891235	0.548981	1.14697	0.978302	0.672104	0.672913	0.851974	1.35966	0.740448	0.690384	0.684433	0.82193	0.553619	0.876465	0.218849	2.30542
212	0.621155	0.687302	0.406281	0.832443	0.729767	0.517151	0.539795	0.638275	0.942047	0.57579	0.543304	0.535629	0.446152	0.459335	0.663345	0.201181	1.59459
214	0.606293	0.703796	0.396393	0.870239	0.763687	0.503204	0.544632	0.631561	1.03699	0.615143	0.552368	0.55629	0.816849	0.466263	0.682648	0.17999	1.37444
216	0.483002	0.584839	0.30365	0.660172	0.615784	0.408234	0.453796	0.494995	0.76593	0.519012	0.463165	0.464951	0.39119	0.386169	0.54509	0.170073	1.09685
218	0.483475	0.636444	0.301895	0.680878	0.66011	0.416077	0.471848	0.492264	0.804245	0.585037	0.493988	0.514465	0.753418	0.399933	0.576843	0.16014	0.975998
220	0.412018	0.554947	0.258804	0.551743	0.545486	0.362076	0.403931	0.404892	0.616013	0.504089	0.436829	0.442352	0.351028	0.347717	0.486343	0.153876	0.841812
222	0.432129	0.619217	0.283203	0.584167	0.57309	0.381989	0.429352	0.42482	0.640457	0.569366	0.480453	0.480057	0.970673	0.373276	0.519119	0.149539	0.78923
224	0.39093	0.570328	0.266495	0.507767	0.489426	0.341843	0.391327	0.382568	0.539047	0.504715	0.441132	0.419693	0.320984	0.340652	0.457153	0.149213	0.715439
226	0.40863	0.629898	0.294266	0.521561	0.493881	0.354218	0.419266	0.403534	0.555054	0.537292	0.464783	0.427826	0.582794	0.36084	0.47316	0.146498	0.683182
228	0.370483	0.582291	0.283142	0.459	0.425323	0.323547	0.397675	0.378845	0.499207	0.476395	0.422928	0.372528	0.329391	0.339798	0.430328	0.144661	0.625031
230	0.377029	0.611816	0.296494	0.442535	0.418213	0.343872	0.403091	0.378967	0.488495	0.452454	0.407349	0.34407	0.44136	0.338303	0.42189	0.142262	0.593262
232	0.353333	0.569077	0.277237	0.398071	0.385361	0.34407	0.383377	0.359467	0.441727	0.404327	0.37149	0.311356	0.31604	0.32164	0.389252	0.142853	0.555573
234	0.354691	0.56575	0.290314	0.389145	0.384827	0.370438	0.384537	0.364395	0.432953	0.399673	0.367996	0.310623	0.392456	0.326141	0.385284	0.140944	0.538101
236	0.3414	0.521851	0.290131	0.360947	0.365585	0.381165	0.360397	0.346237	0.398468	0.378326	0.354111	0.295807	0.299225	0.312103	0.358292	0.138618	0.512802
238	0.354538	0.526413	0.315231	0.359833	0.378479	0.423416	0.3638	0.353989	0.393509	0.397415	0.375916	0.305878	0.35881	0.321472	0.35556	0.13897	0.513885
240	0.349213	0.502151	0.325775	0.340927	0.378143	0.43782	0.347565	0.343155	0.364975	0.398819	0.379913	0.302704	0.262283	0.309418	0.328659	0.142647	0.514587
242	0.369461	0.53038	0.363785	0.351959	0.413452	0.482758	0.360901	0.363037	0.369598	0.443405	0.411713	0.326401	0.304977	0.323578	0.331207	0.144651	0.529877
244	0.366501	0.518784	0.37262	0.343323	0.420074	0.484818	0.349045	0.357056	0.352509	0.450653	0.413223	0.327408	0.224106	0.315872	0.312393	0.145605	0.529831
246	0.402588	0.57312	0.416168	0.370514	0.464462	0.530243	0.373413	0.39299	0.37973	0.528366	0.468307	0.377289	0.28476	0.346176	0.332428	0.142378	0.551941
248	0.409897	0.574173	0.421677	0.368668	0.46611	0.504929	0.36412	0.384537	0.37265	0.534454	0.462784	0.380386	0.21608	0.323074	0.300964	0.136741	0.557358
250	0.451447	0.638321	0.459137	0.397247	0.508057	0.509674	0.393112	0.416306	0.403427	0.587921	0.487625	0.406219	0.267868	0.326263	0.298325	0.128731	0.558563
252	0.445709	0.621292	0.436218	0.379288	0.4879	0.459045	0.378555	0.397354	0.386887	0.542358	0.445847	0.365387	0.194214	0.289597	0.262299	0.12083	0.5298
254	0.478439	0.671066	0.446533	0.388245	0.502609	0.457733	0.386719	0.405502	0.394424	0.568436	0.454269	0.3685	0.223663	0.289749	0.259995	0.117113	0.511444
256	0.467819	0.64537	0.423889	0.369659	0.475067	0.425354	0.365631	0.385849	0.374023	0.541443	0.437973	0.351257	0.175674	0.271942	0.244675	0.119037	0.494293
258	0.481949	0.665695	0.436935	0.381973	0.481522	0.426056	0.373276	0.402084	0.387512	0.567032	0.465668	0.365891	0.203796	0.277557	0.251144	0.121806	0.494217
260	0.458008	0.614838	0.418716	0.373077	0.452087	0.403137	0.3573	0.393204	0.383087	0.541702	0.458221	0.356934	0.173141	0.26796	0.245316	0.124587	0.478577
262	0.46431	0.609604	0.424637	0.385681	0.447266	0.404022	0.357559	0.406235	0.401535	0.551712	0.471268	0.367981	0.194824	0.269714	0.248764	0.123989	0.47374
264	0.444351	0.562073	0.406235	0.373596	0.418167	0.378052	0.335159	0.393692	0.394608	0.515564	0.446259	0.354034	0.16655	0.25235	0.235031	0.119869	0.463776
266	0.447495	0.551147	0.409927	0.375549	0.412552	0.363922	0.328537	0.403961	0.401917	0.509979	0.442093	0.355026	0.180145	0.244705	0.229507	0.111458	0.449631
268	0.420715	0.503082	0.386154	0.352737	0.381134	0.328568	0.304688	0.388214	0.379608	0.4664	0.411163	0.331207	0.153717	0.223846	0.212524	0.102623	0.430511
270	0.414032	0.487579	0.377014	0.345734	0.365738	0.314545	0.29303	0.389053	0.377213	0.452362	0.404175	0.323074	0.175354	0.213013	0.206161	0.0953397	0.407562
272	0.378754	0.432785	0.340668	0.317963	0.323181	0.289062	0.259933	0.358475	0.34964	0.401505	0.366074	0.293777	0.154007	0.19072	0.189514	0.0908855	0.387039
274	0.367584	0.405167	0.331055	0.311127	0.301758	0.286484	0.239029	0.353607	0.346069	0.380783	0.352753	0.286591	0.182938	0.181427	0.187286	0.087781	0.371033
276	0.330307	0.347366	0.301102	0.283173	0.264206	0.265884	0.205582	0.325256	0.315521	0.33049	0.315704	0.260773	0.158264	0.163818	0.176147	0.0881923	0.355545
278	0.318771	0.319962	0.313095	0.288132	0.251007	0.265121	0.204483	0.341812	0.323349	0.329208	0.325424	0.273712	0.198334	0.178604	0.196289	0.0912672	0.346893
280	0.285217	0.275299	0.287506	0.258774	0.222672	0.246475	0.176117	0.31694	0.290939	0.295212	0.303024	0.256927	0.169479	0.172165	0.191345	0.0964258	0.329895
282	0.287399	0.269455	0.289047	0.266129	0.226624	0.265182	0.173645	0.319443	0.292709	0.294373	0.313553	0.26712	0.220764	0.18222	0.205124	0.102251	0.321747
284	0.253632	0.229492	0.263321	0.244186	0.192734	0.244247	0.150467	0.293228	0.2724	0.271225	0.302567	0.259018	0.193466	0.180649	0.206619	0.11108	0.309647
286	0.254745	0.222214	0.270325	0.256439	0.189224	0.263382	0.151657	0.294556	0.281601	0.279495	0.322601	0.278824	0.254745	0.193069	0.226135	0.119305	0.308914
288	0.242264	0.204376	0.248276	0.233139	0.175293	0.265305	0.12944	0.26506	0.256805	0.255371	0.30661	0.26503	0.229584	0.17865	0.21373	0.126889	0.301697
290	0.251846	0.206345	0.262527	0.241241	0.175354	0.295212	0.131622	0.272537	0.263779	0.271591	0.332352	0.288635	0.290329	0.193207	0.228348	0.132626	0.302963
292	0.248688	0.20079	0.26326	0.235352	0.1689	0.310043	0.128708	0.264786	0.255676	0.274002	0.335068	0.295212	0.261673	0.197952	0.22731	0.138278	0.305801
294	0.264771	0.213058	0.284485	0.249893	0.177979	0.34903	0.136002	0.27774	0.269104	0.299225	0.366684	0.326172	0.311798	0.217407	0.242798	0.143498	0.317856
296	0.270233	0.219757	0.295135	0.253448	0.198212	0.368195	0.152908	0.279053	0.271011	0.311966	0.379456	0.340179	0.281708	0.224075	0.24823	0.150568	0.329498
298	0.292007	0.243347	0.326218	0.272003	0.221222	0.409988	0.168289	0.301697	0.290161	0.34848	0.420547	0.375214	0.327301	0.242691	0.269974	0.15941	0.347778
300	0.302368	0.274994	0.344864	0.278198	0.238724	0.431839	0.179855	0.313217	0.296555	0.369156	0.442245	0.387054	0.300644	0.25174	0.280991	0.169897	0.36528
302	0.320862	0.298157	0.37941	0.298172	0.265656	0.482727	0.201065	0.342896	0.315659	0.412415	0.491898	0.418167	0.345764	0.275803	0.306564	0.178632	0.392746
304	0.333221	0.327789	0.396317	0.306427	0.282043	0.50708	0.209015	0.353836	0.317459	0.435867	0.511566	0.428757	0.32341	0.292313	0.318329	0.187095	0.417252
306	0.36113	0.356094	0.441437	0.327377	0.31459	0.56546	0.231781	0.391327	0.344925	0.484467	0.562027	0.468002	0.366623	0.326019	0.344452	0.194935	0.453949
308	0.375763	0.384659	0.471329	0.342407	0.336868	0.585907	0.248169	0.409729	0.356384	0.511337	0.577072	0.489075	0.340591	0.347733	0.355896	0.204891	0.488281
310	0.408096	0.432205	0.531036	0.381317	0.364349	0.627121	0.283432	0.467026	0.397247	0.578003	0.648438	0.543213	0.378845	0.387497	0.385986	0.216224	0.533005
312	0.422119	0.461243	0.561523	0.394196	0.39064	0.615845	0.298035	0.498459	0.412247	0.615646	0.684235	0.562988	0.34639	0.410477	0.40155	0.231971	0.554642
314	0.463654	0.522568	0.625549	0.422241	0.445648	0.647186	0.326767	0.556992	0.44342	0.699677	0.787979	0.609924	0.381897	0.459885	0.442581	0.250284	0.573776
316	0.472534	0.550064	0.630417	0.424149	0.469345	0.629562	0.347443	0.57106	0.446091	0.724014	0.828354	0.604599	0.343338	0.48642	0.463211	0.272279	0.570786
318	0.503967	0.612991	0.6689	0.447128	0.512573	0.668198	0.383438	0.611908	0.471939	0.804352	0.9496	0.636749	0.382874	0.54715	0.513824	0.290349	0.584152
320	0.499664	0.633286	0.653641	0.444916	0.51619	0.658417	0.392944	0.598999	0.468628	0.790649	0.936905	0.618866	0.342926	0.568054	0.528976	0.308102	0.586914
322	0.525497	0.702759	0.695572	0.473465	0.551178	0.700241	0.420242	0.633224	0.502029	0.860367	1.03273	0.662003	0.388855	0.633423	0.583069	0.321669	0.613831
324	0.511612	0.704117	0.681656	0.469482	0.543213	0.662033	0.417282	0.618027	0.500351	0.826416	0.965683	0.652237	0.342697	0.638123	0.585495	0.334946	0.611923
326	0.53331	0.770905	0.735016	0.496704	0.58168	0.664688	0.443527	0.667282	0.53653	0.907959	1.05956	0.706741	0.37413	0.704834	0.638794	0.344495	0.627411
328	0.509644	0.748322	0.705933	0.475357	0.573761	0.588058	0.44017	0.652252	0.519943	0.870636	0.994949	0.677155	0.309891	0.694275	0.627487	0.355802	0.599747
330	0.521362	0.806244	0.734314	0.479645	0.617279	0.559326	0.474899	0.695053	0.53186	0.968994	1.13853	0.699661	0.320236	0.76474	0.682434	0.364795	0.567795
332	0.481445	0.76889	0.664902	0.432404	0.596344	0.48616	0.471024	0.644684	0.481125	0.902481	1.06079	0.622894	0.250641	0.738266	0.65863	0.376502	0.511948
334	0.46756	0.823318	0.649521	0.410187	0.619568	0.468491	0.501755	0.64389	0.459732	0.968338	1.21634	0.594223	0.242813	0.808411	0.710449	0.381585	0.453537
336	0.406998	0.775299	0.562332	0.354614	0.567841	0.427872	0.475677	0.561172	0.395096	0.851974	1.06525	0.498016	0.187073	0.763153	0.672424	0.386711	0.386505
338	0.368698	0.818771	0.530151	0.328323	0.554855	0.43602	0.477875	0.529648	0.363892	0.850082	1.11826	0.451431	0.184387	0.82196	0.71431	0.385393	0.345886
340	0.304214	0.750656	0.460907	0.287064	0.482178	0.423813	0.427231	0.454697	0.313354	0.713303	0.918457	0.378616	0.149231	0.76059	0.667374	0.383453	0.314316
342	0.266327	0.755234	0.4422	0.275223	0.44664	0.458359	0.401489	0.43129	0.297836	0.664978	0.874115	0.351791	0.156921	0.802414	0.695251	0.376239	0.306808
344	0.223419	0.659897	0.40271	0.255508	0.381042	0.46843	0.343704	0.387497	0.274521	0.552307	0.712494	0.314865	0.138718	0.733047	0.643036	0.370734	0.303665
346	0.20784	0.617798	0.406082	0.26059	0.349335	0.527679	0.312943	0.385483	0.279922	0.505508	0.65242	0.313217	0.15419	0.759033	0.662766	0.361897	0.317581
348	0.192688	0.513458	0.394257	0.256241	0.305222	0.547577	0.270264	0.369476	0.275711	0.427765	0.549316	0.301819	0.143402	0.692764	0.611877	0.356303	0.331421
350	0.19812	0.454086	0.420151	0.275223	0.290375	0.623947	0.251816	0.389572	0.296875	0.401123	0.520905	0.321198	0.162918	0.70575	0.623474	0.347652	0.360886
352	0.201782	0.37439	0.428619	0.283813	0.27034	0.643555	0.227829	0.392761	0.308228	0.363678	0.474304	0.329239	0.156784	0.643661	0.57637	0.340904	0.38678
354	0.221802	0.334854	0.473648	0.314621	0.275818	0.717026	0.225723	0.431427	0.343918	0.366684	0.484924	0.364761	0.178192	0.650909	0.584549	0.334183	0.428467
356	0.235291	0.293121	0.492966	0.330978	0.276001	0.705795	0.219589	0.446609	0.363724	0.359604	0.4729	0.383408	0.174927	0.599396	0.546616	0.333491	0.463577
358	0.263153	0.282166	0.548096	0.371078	0.296738	0.760254	0.231186	0.496552	0.410751	0.385162	0.50473	0.43158	0.203079	0.603821	0.557877	0.331051	0.514328
360	0.280075	0.26947	0.562225	0.392334	0.307327	0.743637	0.236267	0.510742	0.436798	0.394287	0.505188	0.453827	0.202057	0.562119	0.52858	0.3332	0.545685
362	0.312485	0.279053	0.610397	0.435791	0.337982	0.803207	0.256226	0.557037	0.489868	0.430893	0.543274	0.505463	0.238541	0.568069	0.541595	0.334733	0.585434
364	0.327469	0.280777	0.61026	0.447372	0.351929	0.783005	0.265137	0.558151	0.504974	0.440094	0.54425	0.516541	0.237137	0.536148	0.516785	0.335955	0.586426
366	0.361298	0.301208	0.6642	0.487793	0.386856	0.852188	0.289963	0.607086	0.555038	0.481598	0.591125	0.567551	0.284454	0.547272	0.534515	0.33149	0.620255
368	0.373413	0.310028	0.657486	0.495224	0.398315	0.825745	0.299866	0.60228	0.563446	0.489761	0.59024	0.573349	0.278015	0.508606	0.501328	0.323773	0.632248
370	0.407562	0.336136	0.705414	0.537079	0.434479	0.898697	0.325943	0.645767	0.615494	0.533997	0.635086	0.626068	0.323868	0.501755	0.49791	0.311611	0.662674
372	0.420151	0.346634	0.68985	0.535202	0.445511	0.858826	0.335388	0.63237	0.61441	0.538788	0.625443	0.620987	0.315475	0.457291	0.453934	0.296862	0.662323
374	0.456848	0.376419	0.737457	0.568161	0.483566	0.887512	0.363281	0.672394	0.656006	0.580246	0.669952	0.663528	0.365585	0.445465	0.440399	0.273565	0.692703
376	0.463501	0.382385	0.721298	0.558762	0.48349	0.798859	0.36618	0.658707	0.64238	0.575134	0.660248	0.650879	0.349792	0.401886	0.398132	0.246683	0.701385
378	0.49469	0.406525	0.762894	0.594254	0.509323	0.784515	0.385223	0.696548	0.685715	0.613953	0.705322	0.698715	0.401886	0.374298	0.372925	0.214296	0.73793
380	0.495819	0.407791	0.730728	0.590225	0.503876	0.699646	0.381897	0.673248	0.679077	0.608765	0.686722	0.691284	0.386353	0.321014	0.32106	0.1782	0.731918
382	0.525696	0.43129	0.74704	0.621933	0.529922	0.656113	0.399094	0.691895	0.722107	0.64859	0.718719	0.734985	0.438446	0.284119	0.282394	0.143174	0.742004
384	0.524033	0.434174	0.700531	0.603394	0.526947	0.544296	0.397964	0.65155	0.699173	0.636749	0.691864	0.711899	0.419754	0.240692	0.238892	0.112783	0.715988
386	0.550507	0.461517	0.705673	0.62413	0.553894	0.454498	0.417084	0.659882	0.729706	0.672165	0.717285	0.747879	0.475983	0.219711	0.220703	0.0877007	0.716248
388	0.533325	0.457458	0.642197	0.60463	0.538437	0.345016	0.414291	0.613968	0.703644	0.657776	0.672607	0.723343	0.453949	0.20015	0.191742	0.0695889	0.676254
390	0.557205	0.48938	0.615372	0.616714	0.569534	0.272125	0.431641	0.593353	0.729279	0.687195	0.654556	0.743637	0.505188	0.181778	0.171738	0.0558343	0.62851
392	0.536362	0.481354	0.515182	0.565903	0.554855	0.215637	0.428345	0.510391	0.674164	0.654388	0.562485	0.673325	0.46463	0.161423	0.151199	0.0457395	0.539444
394	0.545227	0.500854	0.448807	0.517487	0.572083	0.167389	0.435501	0.443176	0.628799	0.641098	0.496857	0.614502	0.489685	0.146698	0.135452	0.0369136	0.444733
396	0.510025	0.481369	0.363419	0.435349	0.534546	0.13295	0.418381	0.362457	0.52948	0.561768	0.417892	0.511093	0.435837	0.129913	0.117691	0.0288724	0.346863
398	0.487595	0.476974	0.320557	0.365143	0.498825	0.0980225	0.389664	0.309891	0.446426	0.50322	0.359558	0.433624	0.437622	0.114426	0.10054	0.0230695	0.280151
400	0.437653	0.443222	0.266678	0.314804	0.432388	0.0694275	0.339783	0.252411	0.366699	0.431305	0.316132	0.361862	0.381332	0.0989685	0.0837097	0.018883	0.221329
402	0.408539	0.432907	0.225739	0.277313	0.389694	0.0561066	0.305817	0.215912	0.317657	0.396469	0.276733	0.318069	0.362595	0.0979004	0.0804291	0.0156862	0.175903
404	0.366653	0.400742	0.181854	0.219711	0.328323	0.0344849	0.265854	0.164078	0.263977	0.344879	0.214493	0.264023	0.294052	0.0902863	0.0716705	0.0134951	0.128372
406	0.349854	0.39595	0.149826	0.18071	0.307297	0.0298157	0.236084	0.12944	0.215714	0.313553	0.166122	0.21225	0.263123	0.0787201	0.0587769	0.0117922	0.095108
408	0.317581	0.371475	0.116364	0.144913	0.260193	0.0207977	0.201904	0.10173	0.168869	0.26445	0.127441	0.163208	0.206635	0.0787659	0.0574493	0.0110666	0.0644836
410	0.303116	0.362656	0.0930786	0.114838	0.21933	0.0142212	0.168137	0.0783234	0.130081	0.222519	0.0963135	0.124222	0.179077	0.0769501	0.054657	0.0105281	0.0438538
412	0.281128	0.332916	0.0711365	0.0803528	0.171112	0.0114746	0.121979	0.0505981	0.0881348	0.171921	0.0627289	0.0832977	0.140137	0.0738983	0.0513611	0.010069	0.0291748
414	0.256989	0.32666	0.0568695	0.0627441	0.139587	0.00799561	0.094696	0.0368042	0.0657654	0.138184	0.0458069	0.0622253	0.123413	0.0644684	0.0412445	0.00991404	0.0202179
416	0.220154	0.288727	0.043869	0.0470734	0.108047	0.00547791	0.0693359	0.025589	0.0473022	0.1082	0.0322418	0.0446625	0.100815	0.0671082	0.0440063	0.0105713	0.0138245
418	0.191696	0.260239	0.0351105	0.0371246	0.0874176	0.00411987	0.0529327	0.0200653	0.038208	0.095459	0.0266876	0.0348969	0.0914612	0.0668182	0.0424805	0.0111325	0.00994873
420	0.159042	0.222778	0.0344849	0.0355377	0.0688477	0.00393677	0.0438843	0.0198059	0.0329285	0.0725403	0.0231934	0.0317993	0.0784149	0.0586853	0.0346832	0.0115266	0.00726318
422	0.143326	0.19783	0.029541	0.0305328	0.0634155	0.00392151	0.0379333	0.0165253	0.0269775	0.0682983	0.0184631	0.0258942	0.0626831	0.0650177	0.0409851	0.0116817	0.00502014
424	0.121414	0.170593	0.0246429	0.025589	0.0539246	0.00105286	0.0316315	0.0132751	0.0219574	0.0565491	0.0144653	0.0207825	0.0540619	0.0601501	0.0361938	0.0124066	0.00379944
426	0.098114	0.149597	0.0214996	0.0223694	0.0465393	-0.000411987	0.0271149	0.0110931	0.0185242	0.0485992	0.0112762	0.0172882	0.0642242	0.0513763	0.0336761	0.0124822	0.00320435
428	0.0878754	0.126938	0.0182648	0.0188904	0.0386353	-0.000152588	0.0224152	0.0091095	0.0150452	0.0409088	0.00836182	0.0137024	0.0478973	0.056488	0.0329437	0.012224	0.00201416
430	0.0712891	0.110367	0.0118713	0.0162354	0.0278473	0.00183105	0.018631	0.00787354	0.012207	0.035965	0.00614929	0.0110779	0.0628662	0.0579529	0.0343933	0.0119279	0.00138855
432	0.0645599	0.0974426	0.0130768	0.0141144	0.0278778	-0.00283813	0.0167694	0.00608826	0.0102386	0.0268402	0.00405884	0.00849915	0.0444031	0.050705	0.0270538	0.0121258	0.000778198
434	0.0553741	0.0823517	0.0115662	0.0122223	0.0231018	-0.00114441	0.0138245	0.00532532	0.00843811	0.0233154	0.00263977	0.00662231	0.0451965	0.0517883	0.028595	0.0120914	0.000686646
436	0.0461578	0.0672913	0.00979614	0.0103149	0.0188141	-0.00144958	0.0116882	0.00440979	0.0065918	0.018158	0.0015564	0.00479126	0.0430908	0.0488129	0.0266571	0.0118067	0.000213623
438	0.0391541	0.0557404	0.0083313	0.00917053	0.0154572	-0.00187683	0.0100403	0.003479	0.00537109	0.0142975	0.000457764	0.00331116	0.0459137	0.0471802	0.0252838	0.0116059	-0.000152588
440	0.0277405	0.040802	0.0040741	0.00798035	0.00946045	-0.000869751	0.00837708	0.00300598	0.00421143	0.0108795	-0.000213623	0.00218201	0.057663	0.0444641	0.0235138	0.0120462	-0.000167847
442	0.0268402	0.0366058	0.00601196	0.00688171	0.0100555	-0.00216675	0.00724792	0.00222778	0.0032196	0.00823975	-0.00106812	0.00114441	0.0603485	0.0426025	0.0220947	0.0118102	-0.000732422
444	0.0218811	0.0293732	0.00488281	0.0059967	0.00808716	-0.00250244	0.00611877	0.00177002	0.00239563	0.00596619	-0.00149536	0.000305176	0.0599365	0.0399628	0.0206451	0.0118304	-0.000747681
446	0.0177612	0.0235138	0.00424194	0.0052948	0.00656128	-0.00309753	0.00526428	0.0012207	0.00178528	0.00372314	-0.00196838	-0.000244141	0.0614929	0.0374908	0.0186005	0.0109549	-0.000991821
448	0.014267	0.0185394	0.00358582	0.00489807	0.00515747	-0.00387573	0.00471497	0.000869751	0.001297	0.00177002	-0.00221252	-0.000991821	0.0606689	0.0340576	0.0163727	0.0100678	-0.00112915
450	0.0113831	0.0148773	0.00309753	0.0043335	0.00401306	-0.00413513	0.00404358	0.000701904	0.000823975	0.000427246	-0.00242615	-0.00115967	0.0624237	0.0318298	0.0148468	0.00918961	-0.00125122
452	0.00878906	0.0115204	0.00288391	0.00402832	0.00314331	-0.00444031	0.00364685	0.000366211	0.000411987	-0.00062561	-0.00265503	-0.00134277	0.0616913	0.0291595	0.0130768	0.00886304	-0.00135803
454	0.00698853	0.00927734	0.00268555	0.00367737	0.00245667	-0.00437927	0.00305176	0.000320435	0.000183105	-0.00108337	-0.00279236	-0.00157166	0.0634613	0.0225677	0.00764465	0.00914615	-0.0012207
456	0.00541687	0.00727844	0.00228882	0.00346375	0.00170898	-0.00390625	0.0027771	0.000198364	-3.05176e-05	-0.00125122	-0.00292969	-0.00172424	0.0626373	0.0203247	0.0110168	0.00936717	-0.00154114
458	0.00430298	0.00570679	0.00218201	0.00317383	0.00109863	-0.0025177	0.00231934	0.000106812	-0.000167847	-0.000595093	-0.00297546	-0.00158691	0.0646973	0.0245361	0.0120544	0.0100808	-0.00160217
460	0.00325012	0.00468445	0.00187683	0.0030365	0.00126648	-0.00346375	0.00228882	-0.000152588	-0.000259399	-0.00164795	-0.00314331	-0.00193787	0.0634308	0.0216217	0.00973511	0.0114844	-0.00178528
462	0.00267029	0.00358582	0.00144958	0.00282288	0.00108337	-0.00439453	0.00228882	-0.000305176	-0.000427246	-0.00253296	-0.00335693	-0.00204468	0.0642395	0.0141907	0.00363159	0.0114888	-0.00183105
464	0.00201416	0.00323486	0.00170898	0.00271606	3.05176e-05	-0.00123596	0.00151062	0.000106812	-0.000442505	-0.000366211	-0.00302124	-0.00183105	0.063385	0.0199738	0.0102692	0.0110472	-0.00193787
466	0.00169373	0.00250244	0.00125122	0.000244141	0.000686646	-0.00317383	9.15527e-05	-0.000442505	-0.000564575	-0.00190735	-0.00238037	-1.52588e-05	0.0643921	0.0160522	0.00688171	0.0104349	-0.00247192
468	0.00134277	0.00209045	0.00115967	0.00242615	0.000350952	-0.00328064	0.00164795	-0.000473022	-0.000488281	-0.00195312	-0.0030365	-0.00201416	0.0625305	0.0140228	0.00569153	0.0102411	-0.00219727
470	0.00120544	0.00187683	0.000930786	0.00260925	0.000473022	-0.00579834	0.00184631	-0.000701904	-0.000778198	-0.00415039	-0.00350952	-0.00216675	0.046875	0.00930786	0.00128174	0.0102836	-0.00219727
472	0.000946045	0.00157166	0.00131226	0.00254822	-0.000579834	-0.00282288	0.00120544	-0.000335693	-0.000717163	-0.00166321	-0.00326538	-0.0020752	0.0583038	0.0108643	0.00418091	0.00998941	-0.0020752
474	0.000778198	0.00146484	0.00117493	0.00228882	-0.000106812	-0.00318909	0.00128174	-0.000411987	-0.000900269	-0.00216675	-0.00340271	-0.00196838	0.0600739	0.0078125	0.00196838	0.0104564	-0.00234985
476	0.000671387	0.00128174	0.00105286	0.00231934	-4.57764e-05	-0.00334167	0.00126648	-0.000564575	-0.00100708	-0.00230408	-0.00340271	-0.00192261	0.0576019	0.00688171	0.00160217	0.0114218	-0.00268555
478	0.000671387	0.00131226	0.00120544	0.00227356	-0.000320435	-0.00344849	0.00114441	-0.000686646	-0.00115967	-3.05176e-05	-0.00344849	-0.00198364	0.056488	0.00553894	0.000946045	0.011787	-0.00274658
480	0.000564575	0.00111389	0.00111389	0.00215149	-0.000564575	-0.00230408	0.000915527	-0.000396729	-0.00123596	-0.00132751	-0.00331116	-0.00180054	0.0538177	0.00559998	0.00169373	0.0123923	-0.000793457
482	0.00062561	0.00123596	0.000900269	0.00212097	-0.00038147	-0.00292969	0.000991821	-0.000717163	-0.00108337	-0.0018158	-0.00344849	-0.00183105	0.0531006	0.00370789	0.000305176	0.0128597	-0.00337219
484	0.000350952	0.000930786	0.00141907	0.00187683	-0.000976562	-0.00144958	0.000579834	-0.000549316	-0.00151062	-0.000747681	-0.0035553	-0.00143433	0.0507355	0.00434875	0.00161743	0.0133088	-0.00354004
486	3.05176e-05	7.62939e-05	0.00312805	0.00164795	-0.000930786	9.15527e-05	0.000732422	-6.10352e-05	-0.00189209	7.62939e-05	-0.00515747	0.000396729	0.0477905	0.00431824	0.00263977	0.0133732	-0.00592041
488	0.000396729	0.000762939	0.000976562	0.00210571	7.62939e-05	-0.0040741	0.00123596	-0.00112915	-0.00163269	-0.00291443	-0.00387573	-0.00166321	0.0457764	-0.000900269	-0.00300598	0.0127962	-0.00430298
490	0.00050354	0.00100708	0.00115967	0.0018158	-0.000717163	-0.00288391	0.000747681	-0.000762939	-0.0014801	-0.00193787	-0.00352478	-0.00170898	0.0444946	0.000244141	-0.00154114	0.0124077	-0.00370789
492	-0.000183105	-3.05176e-05	0.00125122	0.00192261	0.000259399	-0.0030365	0.000793457	-0.000534058	-0.00158691	-0.00233459	-0.00338745	-0.00157166	0.041153	-0.00108337	-0.00260925	0.0119958	-0.00352478
494	0.000411987	0.000823975	0.00120544	0.00186157	-0.000473022	-0.00344849	0.000869751	-0.000808716	-0.00169373	-0.00276184	-0.00349426	-0.0014801	0.0399323	-0.00219727	-0.003479	0.0117955	-0.0035553
496	0.000488281	0.00062561	0.00125122	0.0017395	-0.00088501	-0.00062561	0.000366211	-0.000610352	-0.00158691	-0.00111389	-0.00337219	-0.00149536	0.0367279	7.62939e-05	-0.00109863	0.0117085	-0.00378418
498	0.000442505	0.000778198	0.00134277	0.00190735	-0.000579834	-0.00276184	0.000564575	-0.000808716	-0.00166321	-0.00216675	-0.00326538	-0.00158691	0.0353241	-0.00167847	-0.00262451	0.0117321	-0.00340271
500	0.000411987	0.000946045	0.00117493	0.00189209	-0.000671387	-0.0030365	0.000701904	-0.000793457	-0.00166321	-0.00219727	-0.00349426	-0.00128174	0.0315704	-0.00236511	-0.00332642	0.0118639	-0.00354004
502	0.000457764	0.000976562	0.000976562	0.00193787	-0.000778198	-0.0018158	0.000473022	-0.00050354	-0.00177002	-0.00151062	-0.003479	-0.00115967	0.0309601	-0.00126648	-0.0018158	-0.00115967	-0.0035553
504	0.00038147	0.000900269	0.00102234	0.00193787	-0.000411987	-0.00314331	0.000747681	-0.000701904	-0.00180054	-0.00227356	-0.00343323	-0.00125122	0.0275726	-0.00294495	-0.00354004	-0.00125122	-0.00378418
506	0.000564575	0.000762939	0.00140381	0.00183105	-0.00050354	-0.00370789	0.000564575	-0.000732422	-0.0018158	-0.00271606	-0.00334167	-0.0012207	0.0251617	-0.00360107	-0.00444031	-0.0012207	-0.00361633
508	0.000396729	0.00105286	0.00169373	0.00190735	-0.000610352	-0.00326538	0.000595093	-0.00062561	-0.00166321	-0.00263977	-0.00334167	-0.000900269	0.0221405	-0.00335693	-0.00404358	-0.000900269	-0.00349426
510	0.000579834	0.000991821	0.00175476	0.00193787	-0.000778198	-0.00204468	0.000289917	-0.000518799	-0.00177002	-0.00164795	-0.00309753	-0.000991821	0.0210724	-0.00195312	-0.00271606	-0.000991821	-0.00338745
512	0.000473022	0.000991821	0.00170898	0.00195312	-0.000564575	-0.00291443	0.000579834	-0.000579834	-0.00186157	-0.00263977	-0.00349426	-0.000839233	0.0180817	-0.00341797	-0.00416565	-0.000839233	-0.00115967
514	0.000717163	0.00088501	0.0017395	0.00184631	-0.000579834	-0.00401306	0.000595093	-0.000793457	-0.00183105	-4.57764e-05	-0.00344849	-0.00111389	0.00444031	-0.00378418	-0.00476074	-0.00111389	-0.00331116
516	-1.52588e-05	0.000961304	-1.52588e-05	0.0020752	-0.00062561	-0.00337219	0.000396729	-0.000274658	-0.00186157	-0.00241089	-0.00311279	-0.000930786	0.0119629	-0.00341797	-0.00415039	-0.000930786	-0.00323486
518	9.15527e-05	0.000930786	0.0017395	0.00193787	-0.00062561	-0.00282288	0.000167847	-0.000320435	-0.00183105	-0.0025177	-0.00337219	-0.000793457	0.0119629	-0.00338745	-0.00428772	-0.000793457	-0.00317383
520	0.000900269	0.000976562	0.00161743	0.0019989	-0.00038147	-0.00418091	0.000564575	-0.000564575	-0.00177002	-0.00343323	-0.00340271	-0.000747681	0.0096283	-0.00489807	-0.0058136	-0.000747681	-0.0032196
522	0.000564575	0.000900269	0.00209045	0.0022583	-0.000808716	-0.00416565	0.000534058	-0.000396729	-0.00195312	-0.00354004	-0.00334167	-0.000732422	0.00788879	-0.00489807	-0.00653076	-0.000732422	-0.00291443
524	0.000671387	0.000946045	0.00183105	0.00175476	-0.00050354	-0.00358582	0.000442505	-0.00038147	-0.00161743	-0.00280762	-0.00309753	-0.000778198	0.00645447	-0.00408936	-0.00526428	-0.000778198	-0.00326538
526	0.000564575	0.0010376	0.00195312	0.00205994	-0.000732422	-0.00302124	0.000518799	-0.000518799	-0.00154114	-0.00260925	-0.00334167	-0.000534058	0.00479126	-0.0035553	-0.0045166	-0.000534058	-0.00300598
528	0.000534058	0.00100708	0.00198364	0.00212097	-0.00088501	-0.00279236	0.000259399	-0.00038147	-0.00193787	-0.00234985	-0.00308228	-0.000320435	0.00369263	-0.00340271	-0.00434875	-0.000320435	-0.00292969
530	0.000549316	0.000930786	0.00196838	0.00204468	-0.000534058	-0.00382996	0.000579834	-0.000488281	-0.00175476	-0.00331116	-0.00331116	-0.000747681	0.00297546	-0.00469971	-0.00587463	-0.000747681	-0.00340271
532	0.000610352	0.0012207	0.00186157	0.00192261	-0.000946045	-0.00180054	0.000198364	-0.000213623	-0.00163269	-0.00169373	-0.00325012	-0.000366211	0.00144958	-0.00224304	-0.0032959	-0.000366211	-0.00292969
534	0.000579834	0.000946045	0.00187683	0.00172424	-0.000900269	-0.00192261	0.000106812	-0.000335693	-0.00175476	-0.00170898	-0.00317383	-0.00050354	0.000106812	-0.00228882	-0.0032196	-0.00050354	-0.00358582
536	0.000564575	0.00088501	0.00143433	0.0018158	-0.000244141	-0.00363159	0.000411987	-0.000671387	-0.00172424	-0.00335693	-0.00349426	-0.000564575	0.000717163	-0.00442505	-0.00563049	-0.000564575	-0.00364685
538	0.000518799	0.0010376	0.000915527	0.00186157	-0.00119019	-0.000839233	-0.000259399	-0.000213623	-0.00180054	-0.00109863	-0.00325012	-0.000411987	0.000839233	-0.000946045	-0.00193787	-0.000411987	-0.00363159
540	0.000656128	0.000839233	0.00123596	0.000579834	-0.000686646	-0.00254822	7.62939e-05	1.52588e-05	3.05176e-05	-0.00108337	0	-0.000656128	0.000137329	-0.00250244	-0.00395203	-0.000656128	-0.00352478
542	0.000808716	0.00100708	0.00177002	0.00167847	-0.000793457	-0.00151062	-9.15527e-05	-0.00050354	-0.00186157	-0.00108337	-0.00354004	-0.000579834	7.62939e-05	-0.00187683	-0.00276184	-0.000579834	-0.00387573
544	0.000717163	0.000900269	0.00166321	0.00169373	-0.000991821	-0.00210571	0.000106812	-0.000350952	-0.0017395	-0.00202942	-0.00354004	-0.000473022	-0.00134277	-0.00253296	-0.0037384	-0.000473022	-0.00384521
546	-0.000213623	0.000839233	-7.62939e-05	0.00178528	-0.000808716	-0.00227356	-6.10352e-05	-0.000595093	-0.00172424	-0.00228882	-0.00344849	-0.000656128	-0.00149536	-0.00279236	-0.00379944	-0.000656128	-0.0035553
548	0.000396729	0.000656128	0.00152588	0.00152588	-0.00102234	-0.0022583	6.10352e-05	-0.000442505	-0.00186157	-0.00209045	-0.00361633	-0.000457764	-0.00140381	-0.00253296	-0.00363159	-0.000457764	-0.00427246
550	0.00038147	0.000671387	0.00123596	0.00172424	-0.000488281	-0.00357056	0.000167847	-0.000717163	-0.0019989	-0.00314331	-0.00361633	-0.000640869	-0.00270081	-0.00448608	-0.00559998	-0.000640869	-0.00398254
552	0.000534058	0.000732422	0.00175476	0.0015564	-0.00137329	-0.00160217	-0.000244141	-0.000350952	-0.00196838	-0.00169373	-0.00337219	-0.000305176	-0.00282288	-0.00195312	-0.00323486	-0.000305176	-0.0035553
554	0.000442505	0.000701904	0.00163269	0.00169373	-0.000869751	-0.0030365	-4.57764e-05	-0.00062561	-0.00190735	-0.0020752	-0.00357056	-0.000442505	-0.00335693	-4.57764e-05	-0.000915527	-0.000442505	-0.00389099
556	0.000396729	0.000457764	0.0015564	0.00167847	-0.000915527	-0.00308228	9.15527e-05	-0.000564575	-0.0019989	-0.00276184	-0.0037384	-0.000366211	-0.00350952	-0.00363159	-0.0045929	-0.000366211	-0.00369263
558	0.00038147	0.000732422	-7.62939e-05	0.00149536	-0.000686646	-0.00390625	0.000167847	-0.00100708	-0.00190735	-0.00369263	-0.00341797	-0.000473022	-0.00384521	-0.00466919	-0.00614929	-0.000473022	-0.00390625
560	0.000457764	0.000793457	0.00186157	0.00154114	-0.00160217	-0.000854492	-0.000442505	-0.000244141	-0.00195312	-0.00112915	-0.00335693	-0.000244141	-0.00405884	-0.00132751	-0.00259399	-0.000244141	-0.00357056
562	0.000518799	0.000610352	0.00143433	0.00160217	-0.000915527	-0.00366211	-1.52588e-05	-0.000747681	-0.00201416	-0.00335693	-0.0038147	-0.000564575	-0.00453186	-0.00427246	-0.00590515	-0.000564575	-0.00440979
564	0.000289917	0.000579834	0.00161743	0.00158691	-0.00140381	-0.00256348	-0.000305176	-0.000564575	-0.00201416	-0.00248718	-0.00354004	-0.000320435	-0.00445557	-0.00300598	-0.00427246	-0.000320435	-0.00395203
566	0.000396729	0.00062561	0.001297	0.00143433	-0.00163269	-0.0015564	-0.000396729	-0.000579834	-0.00186157	-0.00140381	-0.00367737	-0.00050354	-0.00572205	-0.00167847	-0.00291443	-0.00050354	-0.00395203
568	0.000366211	0.000579834	0.0015564	0.001297	-0.00196838	0.000701904	-0.000915527	-0.000350952	-0.0018158	0.000579834	-0.00369263	-0.00038147	-0.00419617	0.000976562	0.000137329	-0.00038147	-0.00393677
570	0.000366211	0.000656128	0.00137329	0.00115967	-0.00187683	0.000137329	-0.000747681	-0.000549316	-0.00193787	0.00012207	-0.00372314	-0.000442505	-0.00239563	0.000335693	-0.000350952	-0.000442505	-0.00471497
572	0.000137329	0.000396729	0.00189209	0.00120544	-0.00170898	-0.00112915	-0.00038147	-0.000534058	-0.00209045	-0.00123596	-0.00410461	0	-0.00517273	-0.00144958	-0.00230408	0	-0.00543213
574	-0.000167847	0.000167847	0.00294495	0.000930786	-0.00239563	-0.000427246	-0.000518799	-9.15527e-05	-0.0022583	-0.000976562	-0.00389099	0.000579834	-0.00613403	-0.000930786	-0.00050354	0.000579834	-0.00546265
576	-0.00050354	-0.000350952	0.00352478	0.000137329	-0.00196838	-0.00144958	-6.10352e-05	-4.57764e-05	-0.00219727	-0.00196838	-0.00431824	0.000869751	-0.00622559	-0.00256348	-0.00334167	0.000869751	-0.00444031
578	-0.000610352	-0.000564575	0.00387573	0.00088501	-0.00196838	-0.00305176	0.000106812	-0.000167847	-0.00250244	-0.00326538	-0.00480652	0.00146484	-0.00637817	-0.00431824	-0.00534058	0.00146484	-0.00648499
580	-0.000579834	-0.000671387	0.00418091	0.000915527	-0.00286865	0.000442505	-0.000701904	0.000335693	-0.00231934	-0.00050354	-0.00495911	0.00172424	-0.0059967	-0.000259399	-0.00105286	0.00172424	-0.00479126
582	-0.000366211	-0.000930786	0.00326538	0.00106812	-0.00119019	-0.00598145	0.000350952	-0.000595093	-0.00242615	-0.00523376	-0.00631714	0.00204468	-0.00738525	-0.00743103	-0.00897217	0.00204468	-0.00712585
584	-0.000442505	-0.000518799	0.00384521	0.000778198	-0.00302124	0.000228882	-0.000717163	0.000213623	-0.00038147	-0.000396729	-0.00445557	0.0012207	-0.0059967	-0.000305176	-0.00112915	0.0012207	-0.00521851
586	-0.000534058	0	0.00315857	0.000976562	0.000198364	-0.00413513	0.000411987	-0.00062561	-0.00245667	-0.0027771	-0.00476074	0.000839233	-0.00721741	-0.00688171	-0.00828552	0.000839233	-0.00575256
588	-9.15527e-05	-3.05176e-05	0.00221252	0.00088501	-0.00151062	-0.00424194	4.57764e-05	-0.000717163	-0.00224304	-0.00379944	-0.00427246	0.000259399	-0.0071106	-0.00531006	-0.00682068	0.000259399	-0.00544739
590	0.000305176	0.000305176	0.00062561	0.00117493	-0.000915527	-0.00480652	9.15527e-05	-0.00131226	-0.0020752	-0.0038147	-0.00419617	-0.000808716	-0.00688171	-0.00543213	-0.00697327	-0.000808716	-0.00553894
592	0.000305176	0.000534058	0.00126648	0.000900269	-0.000259399	-3.05176e-05	-0.00109863	-0.000549316	-0.00184631	0.000427246	-0.00358582	-0.000549316	-0.00590515	0.00106812	0.000213623	-0.000549316	-0.00434875
594	0.000305176	0.00038147	0.000732422	0.000946045	-0.00105286	-0.00430298	-0.000244141	-0.00119019	-0.00141907	-0.00331116	-0.00418091	-0.000747681	-0.00688171	-0.00440979	-0.00598145	-0.000747681	-0.00547791
596	0.000228882	0.000366211	0.000534058	0.00112915	-0.000869751	-0.00473022	3.05176e-05	-0.00120544	-0.00088501	-0.00360107	-0.0042572	-0.000717163	-0.00683594	-0.00505066	-0.00671387	-0.000717163	-0.00488281
598	0.000305176	-6.10352e-05	0.00109863	0.000823975	-0.00144958	-0.000854492	-0.000717163	-0.000839233	-0.00196838	-0.00131226	-0.0038147	-0.000564575	-0.00639343	-0.0014801	-0.00265503	-0.000564575	-0.00445557
600	0.000335693	0.000305176	0.000839233	0.000946045	-0.00163269	-0.0027771	-0.000579834	-0.000671387	-0.000488281	-0.00219727	-0.00402832	-0.000549316	-0.00622559	-0.00268555	-0.00419617	-0.000549316	-0.00508118
602	0.000228882	0.000366211	0.000610352	0.000930786	-0.00154114	-0.00305176	-0.000427246	-0.00111389	-0.00187683	-0.00224304	-0.0040741	-0.000717163	-0.00668335	-0.00302124	-0.00445557	-0.000717163	-0.004776
604	0.000228882	0.000518799	6.10352e-05	0.00128174	-0.000930786	-0.0050354	-0.000152588	-0.00143433	-0.00209045	-0.0037384	-0.00422668	-0.000930786	-0.00683594	-0.00518799	-0.00680542	-0.000930786	-0.00521851
606	0.000488281	0.000747681	0.000595093	0.00189209	-0.00158691	-0.00361633	-0.000579834	-0.00105286	-0.00267029	-0.0025177	-0.00367737	-0.00126648	-0.0065155	-0.00344849	-0.00424194	-0.00126648	-0.00450134
608	1.52588e-05	-0.000289917	0.000823975	0.000564575	-0.00126648	-0.00367737	4.57764e-05	-0.00119019	-0.00169373	-0.00309753	-0.0043335	-0.000289917	-0.00561523	-0.00439453	-0.00642395	-0.000289917	-0.00384521
610	0.000549316	0.000305176	0.000900269	0.000534058	-0.00268555	-0.00123596	-0.00112915	-0.000427246	-0.00186157	-0.000762939	-0.00370789	-0.000320435	-0.00566101	-0.000183105	-0.00115967	-0.000320435	-0.00526428
612	-1.52588e-05	0.000213623	0.000183105	0.00119019	-0.00062561	-0.00442505	1.52588e-05	-0.00167847	-0.00198364	-0.0032959	-0.00436401	-0.000900269	-0.00584412	-0.00469971	-0.00643921	-0.000900269	-0.00241089
614	0.000686646	0.000366211	0.00146484	0.000488281	-0.0025177	-0.000778198	-0.00012207	-0.000366211	-0.000854492	-0.00135803	-0.00390625	-0.000213623	-0.00553894	-0.00112915	-0.00180054	-0.000213623	-0.00469971
616	-0.000335693	-1.52588e-05	4.57764e-05	0.00170898	0.000808716	-0.00650024	0.000869751	-0.00180054	-0.00218201	-0.00434875	-0.00422668	-0.000656128	-0.00531006	-0.00418091	-0.00561523	-0.000656128	-0.00431824
618	0.000961304	0.000427246	0.00154114	0.000427246	-0.00305176	-0.0035553	-0.00134277	-0.0012207	-0.00222778	-0.00460815	-0.00450134	-0.000610352	-0.0052948	-0.00460815	-0.00715637	-0.000610352	-0.00447083
620	-0.000305176	0.000137329	0.0010376	0.00131226	-0.000305176	-0.00276184	0	-0.000305176	-0.00157166	-0.00210571	-0.003479	0.000244141	-0.00656128	-0.00166321	-0.00242615	0.000244141	-0.00241089
622	0.000717163	0.000488281	0.00120544	0.000671387	-0.00323486	-0.00186157	-0.00149536	-3.05176e-05	-4.57764e-05	-0.00283813	-0.00445557	0	-0.0038147	-0.00386047	-0.00610352	0	-0.00714111
624	-0.000778198	0.000106812	-0.000152588	0.00184631	0.00178528	-0.00608826	0.00128174	-0.00123596	-0.00218201	-0.00245667	-0.00337219	0.000396729	-0.00770569	0.00012207	-0.000167847	0.000396729	-0.00279236
626	-0.000167847	0.000137329	0.00175476	0.00125122	-0.00106812	-0.00238037	-0.000366211	0.000350952	-0.00216675	-0.00238037	-0.003479	0.000320435	-0.00453186	-0.00495911	-0.00637817	0.000320435	-0.00302124
628	0.00109863	0.000442505	0.00209045	0.000305176	-0.0040741	-0.00112915	-0.00187683	-0.000457764	-0.00222778	-0.00422668	-0.00454712	-0.000564575	-0.00172424	-0.00895691	-0.0105438	-0.000564575	-0.00697327
630	0.00120544	-4.57764e-05	0.00109863	0.000152588	-0.00311279	-0.00518799	-0.00123596	0	-3.05176e-05	-0.00611877	-0.00509644	-4.57764e-05	-0.0050354	-0.00917053	-0.0116577	-4.57764e-05	-0.00660706
632	0.000259399	0.000427246	4.57764e-05	0.00137329	-1.52588e-05	-0.00708008	0.000427246	-0.00218201	-0.00192261	-0.00456238	-0.00408936	-0.000473022	-0.00758362	-0.00369263	-0.00517273	-0.000473022	-0.00384521
634	7.62939e-05	0.000198364	0.000686646	0.00154114	-6.10352e-05	-0.00450134	0.000534058	-0.000823975	-0.00215149	-0.00268555	-0.00358582	0.000335693	-0.00628662	-0.00254822	-0.00372314	0.000335693	-0.00300598
636	0.000320435	0.000259399	0.00146484	0.000839233	-0.00186157	-0.00138855	-0.000762939	-0.000411987	-0.00196838	-0.001297	-0.00372314	-1.52588e-05	-0.00416565	-0.00198364	-0.00372314	-1.52588e-05	-0.0039978
638	0.000335693	0.000411987	0.00100708	0.000961304	-0.000976562	-0.0038147	-0.000213623	-0.00105286	-0.00219727	-0.00332642	-0.00386047	-0.000350952	-0.0045929	-0.00473022	-0.00621033	-0.000350952	-0.00531006
640	0.000549316	0.000488281	0.00109863	0.000701904	-0.00209045	-0.00411987	-0.000640869	-0.000747681	-0.00196838	-0.00421143	-0.00411987	-7.62939e-05	-0.00549316	-0.00648499	-0.00831604	-7.62939e-05	-0.00498962
642	0.000869751	0.000457764	0.000823975	0.000854492	-0.0010376	-0.00566101	3.05176e-05	-0.00178528	-0.00233459	-0.00439453	-0.00439453	-0.000442505	-0.00692749	-0.00566101	-0.00761414	-0.000442505	-0.00440979
644	0.000137329	0.000198364	0.000762939	0.00144958	-0.000534058	-0.00366211	-7.62939e-05	-0.000823975	-0.00183105	-0.00239563	-0.00357056	0.000259399	-0.00508118	-0.00273132	-0.00392151	0.000259399	-0.00422668
646	0.000823975	0.000473022	0.00120544	0.000778198	-0.00193787	-0.0035553	-0.000564575	-0.00123596	-0.00209045	-0.00370789	-0.00415039	-0.000259399	-0.00556946	-0.00523376	-0.00708008	-0.000259399	-0.00436401
648	0.000244141	0.000595093	0.00180054	0.000823975	-0.00262451	0.00222778	-0.001297	0.000228882	-0.00172424	0.0017395	-0.00285339	0.000534058	-0.00392151	0.00280762	0.00161743	0.000534058	-0.00318909
650	0.000610352	0.000350952	0.000915527	0.000747681	-0.00117493	-0.00595093	-6.10352e-05	-0.00172424	-0.00204468	-0.00524902	-0.00479126	-0.000488281	-0.00444031	-0.00688171	-0.00878906	-0.000488281	-9.15527e-05
652	0.00126648	0.000839233	0.0010376	-0.000701904	-0.00395203	-0.0035553	-0.00128174	-0.00228882	-0.00178528	-0.00344849	-0.00489807	-0.000915527	-0.00559998	-0.0015564	-0.00323486	-0.000915527	-0.00778198
654	9.15527e-05	0.000152588	-0.000320435	-0.000106812	0.000915527	-0.00370789	0.00134277	-0.00270081	-0.00141907	0.00421143	-0.00334167	0.000808716	-0.00660706	0.0153961	0.0166626	0.000808716	-0.00900269
656	0.00569153	0.00395203	-0.0157623	0.000549316	-0.00346375	0.00672913	-0.00695801	-0.0045166	0.0012207	0.00946045	-0.0140839	-0.00315857	0.00457764	0.00317383	0.0037384	-0.00315857	-0.0130157
658	0.000320435	0.000259399	0.000701904	0.00146484	-0.000106812	0.000640869	-0.000183105	-0.000488281	-0.00280762	-0.00534058	-0.00520325	-0.000137329	0.00273132	-0.0166321	-0.0187836	-0.000137329	-0.00436401
660	0.00341797	0.00151062	0.000106812	0.000396729	-0.00543213	-0.0119019	-0.00270081	-0.0050354	-0.00221252	-0.0143127	-0.00650024	-0.00392151	-0.00663757	-0.0176697	-0.0210724	-0.00392151	-0.00895691
662	-0.000198364	0.000457764	-0.00108337	0.00218201	0.00317383	-0.00686646	0.00177002	-0.00170898	-0.00189209	-0.000946045	-0.00331116	0.000259399	-0.00556946	0.00241089	0.00230408	0.000259399	-0.00370789
664	-0.00012207	0.000473022	0.00167847	0.000991821	-0.00140381	0.00143433	-0.000518799	0.000610352	-0.00198364	4.57764e-05	-0.00352478	0.000686646	-0.00332642	-0.00274658	-0.00404358	0.000686646	-0.00332642
666	0.0015564	0.000610352	0.00154114	0.000579834	-0.00299072	-0.00657654	-0.00117493	-0.00216675	-0.00239563	-0.00752258	-0.00514221	-0.000564575	-0.00587463	-0.0096283	-0.012085	-0.000564575	-0.00605774
668	-0.000167847	0.000427246	0.000534058	0.00146484	0.000305176	-0.0020752	0.000289917	-0.000350952	-0.00192261	6.10352e-05	-0.00352478	0.00109863	-0.00437927	0.00100708	0.000198364	0.00109863	-0.00302124
670	0.000579834	0.000671387	0.00205994	0.000320435	-0.00340271	-0.00108337	-0.001297	-0.000762939	-0.00215149	-0.00300598	-0.00408936	0.000137329	-0.00460815	-0.00410461	-0.00595093	0.000137329	-0.00506592
672	7.62939e-05	9.15527e-05	0.00157166	0.0010376	-0.0012207	0.000366211	-0.000640869	0.000228882	-0.00189209	0.00062561	-0.00323486	0.00105286	-0.00320435	0.000457764	-0.000930786	0.00105286	-0.00393677
674	0.000823975	0.000350952	0.000762939	0.000915527	-0.00115967	-0.00686646	3.05176e-05	-0.0018158	-0.00236511	-0.00622559	-0.00431824	-0.000137329	0.000106812	-0.00741577	-0.00939941	-0.000137329	-0.00498962
676	0.000488281	0.000305176	0.00187683	0.00100708	-0.00177002	-9.15527e-05	-0.000869751	3.05176e-05	-0.00212097	-0.00209045	-0.0038147	0.000213623	-0.00305176	-0.00497437	-0.0065918	0.000213623	-0.00421143
678	0.000106812	0.000366211	0.000762939	0.000991821	-0.000411987	-0.00306702	-0.000137329	-0.000717163	-0.00205994	0.000335693	-0.00341797	0.000900269	-0.00386047	0.0025177	0.00163269	0.000900269	-0.00384521
680	0.00125122	0.000366211	0.00326538	-7.62939e-05	-0.00556946	0.00102234	-0.00274658	-0.00038147	-0.00218201	-0.00602722	-0.00466919	-0.000274658	-0.00454712	-0.0103149	-0.0132599	-0.000274658	-0.00508118
682	-0.001297	4.57764e-05	-0.000137329	0.00125122	0.00306702	-0.00784302	4.57764e-05	-0.000823975	-0.00222778	0.00338745	-0.00259399	0.00209045	-0.00151062	0.00314331	0.00463867	0.00209045	-0.00401306
684	0.00242615	0.000854492	0.0045929	-0.00157166	-0.0110321	0.00375366	-0.00613403	-0.00119019	-0.00205994	-0.00895691	-0.00540161	-0.00196838	-0.00758362	-0.0101929	-0.013092	-0.00196838	-0.00344849
686	-0.000473022	0.000488281	-0.00366211	0.00196838	0.00592041	-0.0197906	0.00378418	-0.00473022	-0.00265503	0.00231934	-0.00291443	0.0012207	-0.000473022	0.0189209	0.0213013	0.0012207	-0.00157166
688	-0.00202942	-0.000854492	0.00273132	0.00231934	0.00335693	0.00987244	0.00234985	0.00479126	-0.00190735	0.00421143	-0.00254822	0.00291443	-0.00202942	-0.0157776	-0.0192719	0.00291443	-0.0104218
690	0.00267029	0.000473022	0.00712585	-0.00169373	-0.0136566	0.0107422	-0.00743103	0.000701904	-0.00196838	-0.0158234	-0.00679016	-0.00247192	-0.0109711	-0.0270386	-0.0323792	-0.00247192	-0.00302124
692	0.00227356	0.00135803	0.00209045	-0.00119019	-0.00866699	-0.0124512	-0.00318909	-0.00317383	-0.000228882	-0.0150452	-0.00646973	-0.00308228	-0.00497437	-0.000152588	-0.000732422	-0.00308228	0.00257874
694	0.000976562	0.00123596	-0.0032196	0.00105286	0.00138855	-0.025116	0.00115967	-0.00682068	-0.00279236	-0.00360107	-0.00415039	-0.000411987	0.00141907	0.0188599	0.0215302	-0.000411987	-0.00177002
696	-0.00160217	0.000198364	-0.00416565	0.00300598	0.0096283	-0.0140381	0.00578308	-0.00257874	-0.00233459	0.0131683	-0.00115967	0.00328064	0.00460815	0.0261536	0.0289307	0.00328064	-0.00805664
698	-0.00302124	-0.000762939	-0.00231934	0.00386047	0.00845337	-0.00288391	0.00389099	0.00222778	-0.00233459	0.0131073	-0.000808716	0.00494385	0.00100708	0.00848389	0.00836182	0.00494385	-0.0124817
700	-0.0019989	-0.000900269	0.00285339	0.000244141	0.000869751	0.0106049	0.00140381	0.00546265	-0.00198364	0.00131226	-0.0030365	0.00248718	-0.00886536	-0.0250244	-0.0301971	0.00248718	-0.00782776

## Sheet: Cl UV New
	Instrument: HP Diode Array	Instrument: HP Diode Array	Instrument: HP Diode Array	Instrument: HP Diode Array	Instrument: HP Diode Array
	Collection mode: Scan	Collection mode: Scan	Collection mode: Scan	Collection mode: Scan	Collection mode: Scan
	Number of points: 255	Number of points: 255	Number of points: 255	Number of points: 255	Number of points: 255
	Monochromator = 190 to 700 nm	Monochromator = 190 to 700 nm	Monochromator = 190 to 700 nm	Monochromator = 190 to 700 nm	Monochromator = 190 to 700 nm
	Timing mode: Constant Time	Timing mode: Constant Time	Timing mode: Constant Time	Timing mode: Constant Time	Timing mode: Constant Time
	Integration Time: 2.5 sec.	Integration Time: 2.5 sec.	Integration Time: 2.5 sec.	Integration Time: 2.5 sec.	Integration Time: 2.5 sec.
	Apply Reference: True	Apply Reference: True	Apply Reference: True	Apply Reference: True	Apply Reference: True
	Active DCDevices: HPDA (red)	Active DCDevices: HPDA (red)	Active DCDevices: HPDA (red)	Active DCDevices: HPDA (red)	Active DCDevices: HPDA (red)
	Reduction mode: Absorbance	Reduction mode: Absorbance	Reduction mode: Absorbance	Reduction mode: Absorbance	Reduction mode: Absorbance
	Scan mode: Fixed Slitwidth and HV(s)	Scan mode: Fixed Slitwidth and HV(s)	Scan mode: Fixed Slitwidth and HV(s)	Scan mode: Fixed Slitwidth and HV(s)	Scan mode: Fixed Slitwidth and HV(s)
	(HPDA, Slit width = _______ mm (manual))	(HPDA, Slit width = _______ mm (manual))	(HPDA, Slit width = _______ mm (manual))	(HPDA, Slit width = _______ mm (manual))	(HPDA, Slit width = _______ mm (manual))
	Total Elapsed Time = 0:03.9 (min:sec)	Total Elapsed Time = 0:03.9 (min:sec)	Total Elapsed Time = 0:03.9 (min:sec)	Total Elapsed Time = 0:03.9 (min:sec)	Total Elapsed Time = 0:03.9 (min:sec)
Wavelength	4Cl (3)	5Cl (4)	6Cl (5)	7Cl (6)	unsub (17)
190	0.105667	0.226685	0.0613556	0.169037	1.47118
192	0.752838	0.819962	0.40181	0.737946	1.55634
194	0.836578	0.904053	0.0793152	0.851776	2.3958
196	1.10399	1.13716	0.665756	1.11655	1.98669
198	1.10274	1.08897	0.459	1.10846	2.63919
200	1.1176	1.19359	0.697983	1.21844	2.157
202	1.3614	1.33366	0.861053	1.25443	3.00697
204	0.991669	1.07718	0.642395	1.20705	2.35785
206	1.15303	1.31566	0.837433	1.47169	3.0802
208	0.801331	0.872437	0.543579	1.03395	2.30661
210	0.803497	0.891235	0.548981	1.14697	2.30542
212	0.621155	0.687302	0.406281	0.832443	1.59459
214	0.606293	0.703796	0.396393	0.870239	1.37444
216	0.483002	0.584839	0.30365	0.660172	1.09685
218	0.483475	0.636444	0.301895	0.680878	0.975998
220	0.412018	0.554947	0.258804	0.551743	0.841812
222	0.432129	0.619217	0.283203	0.584167	0.78923
224	0.39093	0.570328	0.266495	0.507767	0.715439
226	0.40863	0.629898	0.294266	0.521561	0.683182
228	0.370483	0.582291	0.283142	0.459	0.625031
230	0.377029	0.611816	0.296494	0.442535	0.593262
232	0.353333	0.569077	0.277237	0.398071	0.555573
234	0.354691	0.56575	0.290314	0.389145	0.538101
236	0.3414	0.521851	0.290131	0.360947	0.512802
238	0.354538	0.526413	0.315231	0.359833	0.513885
240	0.349213	0.502151	0.325775	0.340927	0.514587
242	0.369461	0.53038	0.363785	0.351959	0.529877
244	0.366501	0.518784	0.37262	0.343323	0.529831
246	0.402588	0.57312	0.416168	0.370514	0.551941
248	0.409897	0.574173	0.421677	0.368668	0.557358
250	0.451447	0.638321	0.459137	0.397247	0.558563
252	0.445709	0.621292	0.436218	0.379288	0.5298
254	0.478439	0.671066	0.446533	0.388245	0.511444
256	0.467819	0.64537	0.423889	0.369659	0.494293
258	0.481949	0.665695	0.436935	0.381973	0.494217
260	0.458008	0.614838	0.418716	0.373077	0.478577
262	0.46431	0.609604	0.424637	0.385681	0.47374
264	0.444351	0.562073	0.406235	0.373596	0.463776
266	0.447495	0.551147	0.409927	0.375549	0.449631
268	0.420715	0.503082	0.386154	0.352737	0.430511
270	0.414032	0.487579	0.377014	0.345734	0.407562
272	0.378754	0.432785	0.340668	0.317963	0.387039
274	0.367584	0.405167	0.331055	0.311127	0.371033
276	0.330307	0.347366	0.301102	0.283173	0.355545
278	0.318771	0.319962	0.313095	0.288132	0.346893
280	0.285217	0.275299	0.287506	0.258774	0.329895
282	0.287399	0.269455	0.289047	0.266129	0.321747
284	0.253632	0.229492	0.263321	0.244186	0.309647
286	0.254745	0.222214	0.270325	0.256439	0.308914
288	0.242264	0.204376	0.248276	0.233139	0.301697
290	0.251846	0.206345	0.262527	0.241241	0.302963
292	0.248688	0.20079	0.26326	0.235352	0.305801
294	0.264771	0.213058	0.284485	0.249893	0.317856
296	0.270233	0.219757	0.295135	0.253448	0.329498
298	0.292007	0.243347	0.326218	0.272003	0.347778
300	0.302368	0.274994	0.344864	0.278198	0.36528
302	0.320862	0.298157	0.37941	0.298172	0.392746
304	0.333221	0.327789	0.396317	0.306427	0.417252
306	0.36113	0.356094	0.441437	0.327377	0.453949
308	0.375763	0.384659	0.471329	0.342407	0.488281
310	0.408096	0.432205	0.531036	0.381317	0.533005
312	0.422119	0.461243	0.561523	0.394196	0.554642
314	0.463654	0.522568	0.625549	0.422241	0.573776
316	0.472534	0.550064	0.630417	0.424149	0.570786
318	0.503967	0.612991	0.6689	0.447128	0.584152
320	0.499664	0.633286	0.653641	0.444916	0.586914
322	0.525497	0.702759	0.695572	0.473465	0.613831
324	0.511612	0.704117	0.681656	0.469482	0.611923
326	0.53331	0.770905	0.735016	0.496704	0.627411
328	0.509644	0.748322	0.705933	0.475357	0.599747
330	0.521362	0.806244	0.734314	0.479645	0.567795
332	0.481445	0.76889	0.664902	0.432404	0.511948
334	0.46756	0.823318	0.649521	0.410187	0.453537
336	0.406998	0.775299	0.562332	0.354614	0.386505
338	0.368698	0.818771	0.530151	0.328323	0.345886
340	0.304214	0.750656	0.460907	0.287064	0.314316
342	0.266327	0.755234	0.4422	0.275223	0.306808
344	0.223419	0.659897	0.40271	0.255508	0.303665
346	0.20784	0.617798	0.406082	0.26059	0.317581
348	0.192688	0.513458	0.394257	0.256241	0.331421
350	0.19812	0.454086	0.420151	0.275223	0.360886
352	0.201782	0.37439	0.428619	0.283813	0.38678
354	0.221802	0.334854	0.473648	0.314621	0.428467
356	0.235291	0.293121	0.492966	0.330978	0.463577
358	0.263153	0.282166	0.548096	0.371078	0.514328
360	0.280075	0.26947	0.562225	0.392334	0.545685
362	0.312485	0.279053	0.610397	0.435791	0.585434
364	0.327469	0.280777	0.61026	0.447372	0.586426
366	0.361298	0.301208	0.6642	0.487793	0.620255
368	0.373413	0.310028	0.657486	0.495224	0.632248
370	0.407562	0.336136	0.705414	0.537079	0.662674
372	0.420151	0.346634	0.68985	0.535202	0.662323
374	0.456848	0.376419	0.737457	0.568161	0.692703
376	0.463501	0.382385	0.721298	0.558762	0.701385
378	0.49469	0.406525	0.762894	0.594254	0.73793
380	0.495819	0.407791	0.730728	0.590225	0.731918
382	0.525696	0.43129	0.74704	0.621933	0.742004
384	0.524033	0.434174	0.700531	0.603394	0.715988
386	0.550507	0.461517	0.705673	0.62413	0.716248
388	0.533325	0.457458	0.642197	0.60463	0.676254
390	0.557205	0.48938	0.615372	0.616714	0.62851
392	0.536362	0.481354	0.515182	0.565903	0.539444
394	0.545227	0.500854	0.448807	0.517487	0.444733
396	0.510025	0.481369	0.363419	0.435349	0.346863
398	0.487595	0.476974	0.320557	0.365143	0.280151
400	0.437653	0.443222	0.266678	0.314804	0.221329
402	0.408539	0.432907	0.225739	0.277313	0.175903
404	0.366653	0.400742	0.181854	0.219711	0.128372
406	0.349854	0.39595	0.149826	0.18071	0.095108
408	0.317581	0.371475	0.116364	0.144913	0.0644836
410	0.303116	0.362656	0.0930786	0.114838	0.0438538
412	0.281128	0.332916	0.0711365	0.0803528	0.0291748
414	0.256989	0.32666	0.0568695	0.0627441	0.0202179
416	0.220154	0.288727	0.043869	0.0470734	0.0138245
418	0.191696	0.260239	0.0351105	0.0371246	0.00994873
420	0.159042	0.222778	0.0344849	0.0355377	0.00726318
422	0.143326	0.19783	0.029541	0.0305328	0.00502014
424	0.121414	0.170593	0.0246429	0.025589	0.00379944
426	0.098114	0.149597	0.0214996	0.0223694	0.00320435
428	0.0878754	0.126938	0.0182648	0.0188904	0.00201416
430	0.0712891	0.110367	0.0118713	0.0162354	0.00138855
432	0.0645599	0.0974426	0.0130768	0.0141144	0.000778198
434	0.0553741	0.0823517	0.0115662	0.0122223	0.000686646
436	0.0461578	0.0672913	0.00979614	0.0103149	0.000213623
438	0.0391541	0.0557404	0.0083313	0.00917053	-0.000152588
440	0.0277405	0.040802	0.0040741	0.00798035	-0.000167847
442	0.0268402	0.0366058	0.00601196	0.00688171	-0.000732422
444	0.0218811	0.0293732	0.00488281	0.0059967	-0.000747681
446	0.0177612	0.0235138	0.00424194	0.0052948	-0.000991821
448	0.014267	0.0185394	0.00358582	0.00489807	-0.00112915
450	0.0113831	0.0148773	0.00309753	0.0043335	-0.00125122
452	0.00878906	0.0115204	0.00288391	0.00402832	-0.00135803
454	0.00698853	0.00927734	0.00268555	0.00367737	-0.0012207
456	0.00541687	0.00727844	0.00228882	0.00346375	-0.00154114
458	0.00430298	0.00570679	0.00218201	0.00317383	-0.00160217
460	0.00325012	0.00468445	0.00187683	0.0030365	-0.00178528
462	0.00267029	0.00358582	0.00144958	0.00282288	-0.00183105
464	0.00201416	0.00323486	0.00170898	0.00271606	-0.00193787
466	0.00169373	0.00250244	0.00125122	0.000244141	-0.00247192
468	0.00134277	0.00209045	0.00115967	0.00242615	-0.00219727
470	0.00120544	0.00187683	0.000930786	0.00260925	-0.00219727
472	0.000946045	0.00157166	0.00131226	0.00254822	-0.0020752
474	0.000778198	0.00146484	0.00117493	0.00228882	-0.00234985
476	0.000671387	0.00128174	0.00105286	0.00231934	-0.00268555
478	0.000671387	0.00131226	0.00120544	0.00227356	-0.00274658
480	0.000564575	0.00111389	0.00111389	0.00215149	-0.000793457
482	0.00062561	0.00123596	0.000900269	0.00212097	-0.00337219
484	0.000350952	0.000930786	0.00141907	0.00187683	-0.00354004
486	3.05176e-05	7.62939e-05	0.00312805	0.00164795	-0.00592041
488	0.000396729	0.000762939	0.000976562	0.00210571	-0.00430298
490	0.00050354	0.00100708	0.00115967	0.0018158	-0.00370789
492	-0.000183105	-3.05176e-05	0.00125122	0.00192261	-0.00352478
494	0.000411987	0.000823975	0.00120544	0.00186157	-0.0035553
496	0.000488281	0.00062561	0.00125122	0.0017395	-0.00378418
498	0.000442505	0.000778198	0.00134277	0.00190735	-0.00340271
500	0.000411987	0.000946045	0.00117493	0.00189209	-0.00354004
502	0.000457764	0.000976562	0.000976562	0.00193787	-0.0035553
504	0.00038147	0.000900269	0.00102234	0.00193787	-0.00378418
506	0.000564575	0.000762939	0.00140381	0.00183105	-0.00361633
508	0.000396729	0.00105286	0.00169373	0.00190735	-0.00349426
510	0.000579834	0.000991821	0.00175476	0.00193787	-0.00338745
512	0.000473022	0.000991821	0.00170898	0.00195312	-0.00115967
514	0.000717163	0.00088501	0.0017395	0.00184631	-0.00331116
516	-1.52588e-05	0.000961304	-1.52588e-05	0.0020752	-0.00323486
518	9.15527e-05	0.000930786	0.0017395	0.00193787	-0.00317383
520	0.000900269	0.000976562	0.00161743	0.0019989	-0.0032196
522	0.000564575	0.000900269	0.00209045	0.0022583	-0.00291443
524	0.000671387	0.000946045	0.00183105	0.00175476	-0.00326538
526	0.000564575	0.0010376	0.00195312	0.00205994	-0.00300598
528	0.000534058	0.00100708	0.00198364	0.00212097	-0.00292969
530	0.000549316	0.000930786	0.00196838	0.00204468	-0.00340271
532	0.000610352	0.0012207	0.00186157	0.00192261	-0.00292969
534	0.000579834	0.000946045	0.00187683	0.00172424	-0.00358582
536	0.000564575	0.00088501	0.00143433	0.0018158	-0.00364685
538	0.000518799	0.0010376	0.000915527	0.00186157	-0.00363159
540	0.000656128	0.000839233	0.00123596	0.000579834	-0.00352478
542	0.000808716	0.00100708	0.00177002	0.00167847	-0.00387573
544	0.000717163	0.000900269	0.00166321	0.00169373	-0.00384521
546	-0.000213623	0.000839233	-7.62939e-05	0.00178528	-0.0035553
548	0.000396729	0.000656128	0.00152588	0.00152588	-0.00427246
550	0.00038147	0.000671387	0.00123596	0.00172424	-0.00398254
552	0.000534058	0.000732422	0.00175476	0.0015564	-0.0035553
554	0.000442505	0.000701904	0.00163269	0.00169373	-0.00389099
556	0.000396729	0.000457764	0.0015564	0.00167847	-0.00369263
558	0.00038147	0.000732422	-7.62939e-05	0.00149536	-0.00390625
560	0.000457764	0.000793457	0.00186157	0.00154114	-0.00357056
562	0.000518799	0.000610352	0.00143433	0.00160217	-0.00440979
564	0.000289917	0.000579834	0.00161743	0.00158691	-0.00395203
566	0.000396729	0.00062561	0.001297	0.00143433	-0.00395203
568	0.000366211	0.000579834	0.0015564	0.001297	-0.00393677
570	0.000366211	0.000656128	0.00137329	0.00115967	-0.00471497
572	0.000137329	0.000396729	0.00189209	0.00120544	-0.00543213
574	-0.000167847	0.000167847	0.00294495	0.000930786	-0.00546265
576	-0.00050354	-0.000350952	0.00352478	0.000137329	-0.00444031
578	-0.000610352	-0.000564575	0.00387573	0.00088501	-0.00648499
580	-0.000579834	-0.000671387	0.00418091	0.000915527	-0.00479126
582	-0.000366211	-0.000930786	0.00326538	0.00106812	-0.00712585
584	-0.000442505	-0.000518799	0.00384521	0.000778198	-0.00521851
586	-0.000534058	0	0.00315857	0.000976562	-0.00575256
588	-9.15527e-05	-3.05176e-05	0.00221252	0.00088501	-0.00544739
590	0.000305176	0.000305176	0.00062561	0.00117493	-0.00553894
592	0.000305176	0.000534058	0.00126648	0.000900269	-0.00434875
594	0.000305176	0.00038147	0.000732422	0.000946045	-0.00547791
596	0.000228882	0.000366211	0.000534058	0.00112915	-0.00488281
598	0.000305176	-6.10352e-05	0.00109863	0.000823975	-0.00445557
600	0.000335693	0.000305176	0.000839233	0.000946045	-0.00508118
602	0.000228882	0.000366211	0.000610352	0.000930786	-0.004776
604	0.000228882	0.000518799	6.10352e-05	0.00128174	-0.00521851
606	0.000488281	0.000747681	0.000595093	0.00189209	-0.00450134
608	1.52588e-05	-0.000289917	0.000823975	0.000564575	-0.00384521
610	0.000549316	0.000305176	0.000900269	0.000534058	-0.00526428
612	-1.52588e-05	0.000213623	0.000183105	0.00119019	-0.00241089
614	0.000686646	0.000366211	0.00146484	0.000488281	-0.00469971
616	-0.000335693	-1.52588e-05	4.57764e-05	0.00170898	-0.00431824
618	0.000961304	0.000427246	0.00154114	0.000427246	-0.00447083
620	-0.000305176	0.000137329	0.0010376	0.00131226	-0.00241089
622	0.000717163	0.000488281	0.00120544	0.000671387	-0.00714111
624	-0.000778198	0.000106812	-0.000152588	0.00184631	-0.00279236
626	-0.000167847	0.000137329	0.00175476	0.00125122	-0.00302124
628	0.00109863	0.000442505	0.00209045	0.000305176	-0.00697327
630	0.00120544	-4.57764e-05	0.00109863	0.000152588	-0.00660706
632	0.000259399	0.000427246	4.57764e-05	0.00137329	-0.00384521
634	7.62939e-05	0.000198364	0.000686646	0.00154114	-0.00300598
636	0.000320435	0.000259399	0.00146484	0.000839233	-0.0039978
638	0.000335693	0.000411987	0.00100708	0.000961304	-0.00531006
640	0.000549316	0.000488281	0.00109863	0.000701904	-0.00498962
642	0.000869751	0.000457764	0.000823975	0.000854492	-0.00440979
644	0.000137329	0.000198364	0.000762939	0.00144958	-0.00422668
646	0.000823975	0.000473022	0.00120544	0.000778198	-0.00436401
648	0.000244141	0.000595093	0.00180054	0.000823975	-0.00318909
650	0.000610352	0.000350952	0.000915527	0.000747681	-9.15527e-05
652	0.00126648	0.000839233	0.0010376	-0.000701904	-0.00778198
654	9.15527e-05	0.000152588	-0.000320435	-0.000106812	-0.00900269
656	0.00569153	0.00395203	-0.0157623	0.000549316	-0.0130157
658	0.000320435	0.000259399	0.000701904	0.00146484	-0.00436401
660	0.00341797	0.00151062	0.000106812	0.000396729	-0.00895691
662	-0.000198364	0.000457764	-0.00108337	0.00218201	-0.00370789
664	-0.00012207	0.000473022	0.00167847	0.000991821	-0.00332642
666	0.0015564	0.000610352	0.00154114	0.000579834	-0.00605774
668	-0.000167847	0.000427246	0.000534058	0.00146484	-0.00302124
670	0.000579834	0.000671387	0.00205994	0.000320435	-0.00506592
672	7.62939e-05	9.15527e-05	0.00157166	0.0010376	-0.00393677
674	0.000823975	0.000350952	0.000762939	0.000915527	-0.00498962
676	0.000488281	0.000305176	0.00187683	0.00100708	-0.00421143
678	0.000106812	0.000366211	0.000762939	0.000991821	-0.00384521
680	0.00125122	0.000366211	0.00326538	-7.62939e-05	-0.00508118
682	-0.001297	4.57764e-05	-0.000137329	0.00125122	-0.00401306
684	0.00242615	0.000854492	0.0045929	-0.00157166	-0.00344849
686	-0.000473022	0.000488281	-0.00366211	0.00196838	-0.00157166
688	-0.00202942	-0.000854492	0.00273132	0.00231934	-0.0104218
690	0.00267029	0.000473022	0.00712585	-0.00169373	-0.00302124
692	0.00227356	0.00135803	0.00209045	-0.00119019	0.00257874
694	0.000976562	0.00123596	-0.0032196	0.00105286	-0.00177002
696	-0.00160217	0.000198364	-0.00416565	0.00300598	-0.00805664
698	-0.00302124	-0.000762939	-0.00231934	0.00386047	-0.0124817
700	-0.0019989	-0.000900269	0.00285339	0.000244141	-0.00782776
				0.000244141

## Sheet: F UV New
	Instrument: HP Diode Array	Instrument: HP Diode Array	Instrument: HP Diode Array
	Collection mode: Scan	Collection mode: Scan	Collection mode: Scan
	Number of points: 255	Number of points: 255	Number of points: 255
	Monochromator = 190 to 700 nm	Monochromator = 190 to 700 nm	Monochromator = 190 to 700 nm
	Timing mode: Constant Time	Timing mode: Constant Time	Timing mode: Constant Time
	Integration Time: 2.5 sec.	Integration Time: 2.5 sec.	Integration Time: 2.5 sec.
	Apply Reference: True	Apply Reference: True	Apply Reference: True
	Active DCDevices: HPDA (red)	Active DCDevices: HPDA (red)	Active DCDevices: HPDA (red)
	Reduction mode: Absorbance	Reduction mode: Absorbance	Reduction mode: Absorbance
	Scan mode: Fixed Slitwidth and HV(s)	Scan mode: Fixed Slitwidth and HV(s)	Scan mode: Fixed Slitwidth and HV(s)
	(HPDA, Slit width = _______ mm (manual))	(HPDA, Slit width = _______ mm (manual))	(HPDA, Slit width = _______ mm (manual))
	Total Elapsed Time = 0:03.9 (min:sec)	Total Elapsed Time = 0:03.9 (min:sec)	Total Elapsed Time = 0:03.9 (min:sec)
Wavelength	5F	6F	unsub
190	0.234116	0.0453949	1.47118
192	0.787216	0.703613	1.55634
194	0.884628	0.809998	2.3958
196	1.17937	1.08574	1.98669
198	1.1636	1.0706	2.63919
200	1.25562	1.07922	2.157
202	1.2961	1.3349	3.00697
204	1.22194	0.955399	2.35785
206	1.51173	1.0788	3.0802
208	0.950256	0.721268	2.30661
210	0.978302	0.672104	2.30542
212	0.729767	0.517151	1.59459
214	0.763687	0.503204	1.37444
216	0.615784	0.408234	1.09685
218	0.66011	0.416077	0.975998
220	0.545486	0.362076	0.841812
222	0.57309	0.381989	0.78923
224	0.489426	0.341843	0.715439
226	0.493881	0.354218	0.683182
228	0.425323	0.323547	0.625031
230	0.418213	0.343872	0.593262
232	0.385361	0.34407	0.555573
234	0.384827	0.370438	0.538101
236	0.365585	0.381165	0.512802
238	0.378479	0.423416	0.513885
240	0.378143	0.43782	0.514587
242	0.413452	0.482758	0.529877
244	0.420074	0.484818	0.529831
246	0.464462	0.530243	0.551941
248	0.46611	0.504929	0.557358
250	0.508057	0.509674	0.558563
252	0.4879	0.459045	0.5298
254	0.502609	0.457733	0.511444
256	0.475067	0.425354	0.494293
258	0.481522	0.426056	0.494217
260	0.452087	0.403137	0.478577
262	0.447266	0.404022	0.47374
264	0.418167	0.378052	0.463776
266	0.412552	0.363922	0.449631
268	0.381134	0.328568	0.430511
270	0.365738	0.314545	0.407562
272	0.323181	0.289062	0.387039
274	0.301758	0.286484	0.371033
276	0.264206	0.265884	0.355545
278	0.251007	0.265121	0.346893
280	0.222672	0.246475	0.329895
282	0.226624	0.265182	0.321747
284	0.192734	0.244247	0.309647
286	0.189224	0.263382	0.308914
288	0.175293	0.265305	0.301697
290	0.175354	0.295212	0.302963
292	0.1689	0.310043	0.305801
294	0.177979	0.34903	0.317856
296	0.198212	0.368195	0.329498
298	0.221222	0.409988	0.347778
300	0.238724	0.431839	0.36528
302	0.265656	0.482727	0.392746
304	0.282043	0.50708	0.417252
306	0.31459	0.56546	0.453949
308	0.336868	0.585907	0.488281
310	0.364349	0.627121	0.533005
312	0.39064	0.615845	0.554642
314	0.445648	0.647186	0.573776
316	0.469345	0.629562	0.570786
318	0.512573	0.668198	0.584152
320	0.51619	0.658417	0.586914
322	0.551178	0.700241	0.613831
324	0.543213	0.662033	0.611923
326	0.58168	0.664688	0.627411
328	0.573761	0.588058	0.599747
330	0.617279	0.559326	0.567795
332	0.596344	0.48616	0.511948
334	0.619568	0.468491	0.453537
336	0.567841	0.427872	0.386505
338	0.554855	0.43602	0.345886
340	0.482178	0.423813	0.314316
342	0.44664	0.458359	0.306808
344	0.381042	0.46843	0.303665
346	0.349335	0.527679	0.317581
348	0.305222	0.547577	0.331421
350	0.290375	0.623947	0.360886
352	0.27034	0.643555	0.38678
354	0.275818	0.717026	0.428467
356	0.276001	0.705795	0.463577
358	0.296738	0.760254	0.514328
360	0.307327	0.743637	0.545685
362	0.337982	0.803207	0.585434
364	0.351929	0.783005	0.586426
366	0.386856	0.852188	0.620255
368	0.398315	0.825745	0.632248
370	0.434479	0.898697	0.662674
372	0.445511	0.858826	0.662323
374	0.483566	0.887512	0.692703
376	0.48349	0.798859	0.701385
378	0.509323	0.784515	0.73793
380	0.503876	0.699646	0.731918
382	0.529922	0.656113	0.742004
384	0.526947	0.544296	0.715988
386	0.553894	0.454498	0.716248
388	0.538437	0.345016	0.676254
390	0.569534	0.272125	0.62851
392	0.554855	0.215637	0.539444
394	0.572083	0.167389	0.444733
396	0.534546	0.13295	0.346863
398	0.498825	0.0980225	0.280151
400	0.432388	0.0694275	0.221329
402	0.389694	0.0561066	0.175903
404	0.328323	0.0344849	0.128372
406	0.307297	0.0298157	0.095108
408	0.260193	0.0207977	0.0644836
410	0.21933	0.0142212	0.0438538
412	0.171112	0.0114746	0.0291748
414	0.139587	0.00799561	0.0202179
416	0.108047	0.00547791	0.0138245
418	0.0874176	0.00411987	0.00994873
420	0.0688477	0.00393677	0.00726318
422	0.0634155	0.00392151	0.00502014
424	0.0539246	0.00105286	0.00379944
426	0.0465393	-0.000411987	0.00320435
428	0.0386353	-0.000152588	0.00201416
430	0.0278473	0.00183105	0.00138855
432	0.0278778	-0.00283813	0.000778198
434	0.0231018	-0.00114441	0.000686646
436	0.0188141	-0.00144958	0.000213623
438	0.0154572	-0.00187683	-0.000152588
440	0.00946045	-0.000869751	-0.000167847
442	0.0100555	-0.00216675	-0.000732422
444	0.00808716	-0.00250244	-0.000747681
446	0.00656128	-0.00309753	-0.000991821
448	0.00515747	-0.00387573	-0.00112915
450	0.00401306	-0.00413513	-0.00125122
452	0.00314331	-0.00444031	-0.00135803
454	0.00245667	-0.00437927	-0.0012207
456	0.00170898	-0.00390625	-0.00154114
458	0.00109863	-0.0025177	-0.00160217
460	0.00126648	-0.00346375	-0.00178528
462	0.00108337	-0.00439453	-0.00183105
464	3.05176e-05	-0.00123596	-0.00193787
466	0.000686646	-0.00317383	-0.00247192
468	0.000350952	-0.00328064	-0.00219727
470	0.000473022	-0.00579834	-0.00219727
472	-0.000579834	-0.00282288	-0.0020752
474	-0.000106812	-0.00318909	-0.00234985
476	-4.57764e-05	-0.00334167	-0.00268555
478	-0.000320435	-0.00344849	-0.00274658
480	-0.000564575	-0.00230408	-0.000793457
482	-0.00038147	-0.00292969	-0.00337219
484	-0.000976562	-0.00144958	-0.00354004
486	-0.000930786	9.15527e-05	-0.00592041
488	7.62939e-05	-0.0040741	-0.00430298
490	-0.000717163	-0.00288391	-0.00370789
492	0.000259399	-0.0030365	-0.00352478
494	-0.000473022	-0.00344849	-0.0035553
496	-0.00088501	-0.00062561	-0.00378418
498	-0.000579834	-0.00276184	-0.00340271
500	-0.000671387	-0.0030365	-0.00354004
502	-0.000778198	-0.0018158	-0.0035553
504	-0.000411987	-0.00314331	-0.00378418
506	-0.00050354	-0.00370789	-0.00361633
508	-0.000610352	-0.00326538	-0.00349426
510	-0.000778198	-0.00204468	-0.00338745
512	-0.000564575	-0.00291443	-0.00115967
514	-0.000579834	-0.00401306	-0.00331116
516	-0.00062561	-0.00337219	-0.00323486
518	-0.00062561	-0.00282288	-0.00317383
520	-0.00038147	-0.00418091	-0.0032196
522	-0.000808716	-0.00416565	-0.00291443
524	-0.00050354	-0.00358582	-0.00326538
526	-0.000732422	-0.00302124	-0.00300598
528	-0.00088501	-0.00279236	-0.00292969
530	-0.000534058	-0.00382996	-0.00340271
532	-0.000946045	-0.00180054	-0.00292969
534	-0.000900269	-0.00192261	-0.00358582
536	-0.000244141	-0.00363159	-0.00364685
538	-0.00119019	-0.000839233	-0.00363159
540	-0.000686646	-0.00254822	-0.00352478
542	-0.000793457	-0.00151062	-0.00387573
544	-0.000991821	-0.00210571	-0.00384521
546	-0.000808716	-0.00227356	-0.0035553
548	-0.00102234	-0.0022583	-0.00427246
550	-0.000488281	-0.00357056	-0.00398254
552	-0.00137329	-0.00160217	-0.0035553
554	-0.000869751	-0.0030365	-0.00389099
556	-0.000915527	-0.00308228	-0.00369263
558	-0.000686646	-0.00390625	-0.00390625
560	-0.00160217	-0.000854492	-0.00357056
562	-0.000915527	-0.00366211	-0.00440979
564	-0.00140381	-0.00256348	-0.00395203
566	-0.00163269	-0.0015564	-0.00395203
568	-0.00196838	0.000701904	-0.00393677
570	-0.00187683	0.000137329	-0.00471497
572	-0.00170898	-0.00112915	-0.00543213
574	-0.00239563	-0.000427246	-0.00546265
576	-0.00196838	-0.00144958	-0.00444031
578	-0.00196838	-0.00305176	-0.00648499
580	-0.00286865	0.000442505	-0.00479126
582	-0.00119019	-0.00598145	-0.00712585
584	-0.00302124	0.000228882	-0.00521851
586	0.000198364	-0.00413513	-0.00575256
588	-0.00151062	-0.00424194	-0.00544739
590	-0.000915527	-0.00480652	-0.00553894
592	-0.000259399	-3.05176e-05	-0.00434875
594	-0.00105286	-0.00430298	-0.00547791
596	-0.000869751	-0.00473022	-0.00488281
598	-0.00144958	-0.000854492	-0.00445557
600	-0.00163269	-0.0027771	-0.00508118
602	-0.00154114	-0.00305176	-0.004776
604	-0.000930786	-0.0050354	-0.00521851
606	-0.00158691	-0.00361633	-0.00450134
608	-0.00126648	-0.00367737	-0.00384521
610	-0.00268555	-0.00123596	-0.00526428
612	-0.00062561	-0.00442505	-0.00241089
614	-0.0025177	-0.000778198	-0.00469971
616	0.000808716	-0.00650024	-0.00431824
618	-0.00305176	-0.0035553	-0.00447083
620	-0.000305176	-0.00276184	-0.00241089
622	-0.00323486	-0.00186157	-0.00714111
624	0.00178528	-0.00608826	-0.00279236
626	-0.00106812	-0.00238037	-0.00302124
628	-0.0040741	-0.00112915	-0.00697327
630	-0.00311279	-0.00518799	-0.00660706
632	-1.52588e-05	-0.00708008	-0.00384521
634	-6.10352e-05	-0.00450134	-0.00300598
636	-0.00186157	-0.00138855	-0.0039978
638	-0.000976562	-0.0038147	-0.00531006
640	-0.00209045	-0.00411987	-0.00498962
642	-0.0010376	-0.00566101	-0.00440979
644	-0.000534058	-0.00366211	-0.00422668
646	-0.00193787	-0.0035553	-0.00436401
648	-0.00262451	0.00222778	-0.00318909
650	-0.00117493	-0.00595093	-9.15527e-05
652	-0.00395203	-0.0035553	-0.00778198
654	0.000915527	-0.00370789	-0.00900269
656	-0.00346375	0.00672913	-0.0130157
658	-0.000106812	0.000640869	-0.00436401
660	-0.00543213	-0.0119019	-0.00895691
662	0.00317383	-0.00686646	-0.00370789
664	-0.00140381	0.00143433	-0.00332642
666	-0.00299072	-0.00657654	-0.00605774
668	0.000305176	-0.0020752	-0.00302124
670	-0.00340271	-0.00108337	-0.00506592
672	-0.0012207	0.000366211	-0.00393677
674	-0.00115967	-0.00686646	-0.00498962
676	-0.00177002	-9.15527e-05	-0.00421143
678	-0.000411987	-0.00306702	-0.00384521
680	-0.00556946	0.00102234	-0.00508118
682	0.00306702	-0.00784302	-0.00401306
684	-0.0110321	0.00375366	-0.00344849
686	0.00592041	-0.0197906	-0.00157166
688	0.00335693	0.00987244	-0.0104218
690	-0.0136566	0.0107422	-0.00302124
692	-0.00866699	-0.0124512	0.00257874
694	0.00138855	-0.025116	-0.00177002
696	0.0096283	-0.0140381	-0.00805664
698	0.00845337	-0.00288391	-0.0124817
700	0.000869751	0.0106049	-0.00782776

## Sheet: Br UV New
	Instrument: HP Diode Array	Instrument: HP Diode Array	Instrument: HP Diode Array	Instrument: HP Diode Array
	Collection mode: Scan	Collection mode: Scan	Collection mode: Scan	Collection mode: Scan
	Number of points: 255	Number of points: 255	Number of points: 255	Number of points: 255
	Monochromator = 190 to 700 nm	Monochromator = 190 to 700 nm	Monochromator = 190 to 700 nm	Monochromator = 190 to 700 nm
	Timing mode: Constant Time	Timing mode: Constant Time	Timing mode: Constant Time	Timing mode: Constant Time
	Integration Time: 2.5 sec.	Integration Time: 2.5 sec.	Integration Time: 2.5 sec.	Integration Time: 2.5 sec.
	Apply Reference: True	Apply Reference: True	Apply Reference: True	Apply Reference: True
	Active DCDevices: HPDA (red)	Active DCDevices: HPDA (red)	Active DCDevices: HPDA (red)	Active DCDevices: HPDA (red)
	Reduction mode: Absorbance	Reduction mode: Absorbance	Reduction mode: Absorbance	Reduction mode: Absorbance
	Scan mode: Fixed Slitwidth and HV(s)	Scan mode: Fixed Slitwidth and HV(s)	Scan mode: Fixed Slitwidth and HV(s)	Scan mode: Fixed Slitwidth and HV(s)
	(HPDA, Slit width = _______ mm (manual))	(HPDA, Slit width = _______ mm (manual))	(HPDA, Slit width = _______ mm (manual))	(HPDA, Slit width = _______ mm (manual))
	Total Elapsed Time = 0:03.9 (min:sec)	Total Elapsed Time = 0:03.9 (min:sec)	Total Elapsed Time = 0:03.9 (min:sec)	Total Elapsed Time = 0:03.9 (min:sec)
Wavelength	5Br	6Br	7Br	unsub
190	0.168182	0.207794	0.204819	1.47118
192	0.661179	0.744995	0.743805	1.55634
194	0.726715	0.841919	0.884033	2.3958
196	0.976028	1.12474	1.17683	1.98669
198	0.989471	1.07246	1.15874	2.63919
200	0.982788	1.15051	1.29874	2.157
202	1.24614	1.19257	1.24373	3.00697
204	0.841568	1.04976	1.30316	2.35785
206	0.928284	1.30417	1.43082	3.0802
208	0.671158	0.841507	1.14511	2.30661
210	0.672913	0.851974	1.35966	2.30542
212	0.539795	0.638275	0.942047	1.59459
214	0.544632	0.631561	1.03699	1.37444
216	0.453796	0.494995	0.76593	1.09685
218	0.471848	0.492264	0.804245	0.975998
220	0.403931	0.404892	0.616013	0.841812
222	0.429352	0.42482	0.640457	0.78923
224	0.391327	0.382568	0.539047	0.715439
226	0.419266	0.403534	0.555054	0.683182
228	0.397675	0.378845	0.499207	0.625031
230	0.403091	0.378967	0.488495	0.593262
232	0.383377	0.359467	0.441727	0.555573
234	0.384537	0.364395	0.432953	0.538101
236	0.360397	0.346237	0.398468	0.512802
238	0.3638	0.353989	0.393509	0.513885
240	0.347565	0.343155	0.364975	0.514587
242	0.360901	0.363037	0.369598	0.529877
244	0.349045	0.357056	0.352509	0.529831
246	0.373413	0.39299	0.37973	0.551941
248	0.36412	0.384537	0.37265	0.557358
250	0.393112	0.416306	0.403427	0.558563
252	0.378555	0.397354	0.386887	0.5298
254	0.386719	0.405502	0.394424	0.511444
256	0.365631	0.385849	0.374023	0.494293
258	0.373276	0.402084	0.387512	0.494217
260	0.3573	0.393204	0.383087	0.478577
262	0.357559	0.406235	0.401535	0.47374
264	0.335159	0.393692	0.394608	0.463776
266	0.328537	0.403961	0.401917	0.449631
268	0.304688	0.388214	0.379608	0.430511
270	0.29303	0.389053	0.377213	0.407562
272	0.259933	0.358475	0.34964	0.387039
274	0.239029	0.353607	0.346069	0.371033
276	0.205582	0.325256	0.315521	0.355545
278	0.204483	0.341812	0.323349	0.346893
280	0.176117	0.31694	0.290939	0.329895
282	0.173645	0.319443	0.292709	0.321747
284	0.150467	0.293228	0.2724	0.309647
286	0.151657	0.294556	0.281601	0.308914
288	0.12944	0.26506	0.256805	0.301697
290	0.131622	0.272537	0.263779	0.302963
292	0.128708	0.264786	0.255676	0.305801
294	0.136002	0.27774	0.269104	0.317856
296	0.152908	0.279053	0.271011	0.329498
298	0.168289	0.301697	0.290161	0.347778
300	0.179855	0.313217	0.296555	0.36528
302	0.201065	0.342896	0.315659	0.392746
304	0.209015	0.353836	0.317459	0.417252
306	0.231781	0.391327	0.344925	0.453949
308	0.248169	0.409729	0.356384	0.488281
310	0.283432	0.467026	0.397247	0.533005
312	0.298035	0.498459	0.412247	0.554642
314	0.326767	0.556992	0.44342	0.573776
316	0.347443	0.57106	0.446091	0.570786
318	0.383438	0.611908	0.471939	0.584152
320	0.392944	0.598999	0.468628	0.586914
322	0.420242	0.633224	0.502029	0.613831
324	0.417282	0.618027	0.500351	0.611923
326	0.443527	0.667282	0.53653	0.627411
328	0.44017	0.652252	0.519943	0.599747
330	0.474899	0.695053	0.53186	0.567795
332	0.471024	0.644684	0.481125	0.511948
334	0.501755	0.64389	0.459732	0.453537
336	0.475677	0.561172	0.395096	0.386505
338	0.477875	0.529648	0.363892	0.345886
340	0.427231	0.454697	0.313354	0.314316
342	0.401489	0.43129	0.297836	0.306808
344	0.343704	0.387497	0.274521	0.303665
346	0.312943	0.385483	0.279922	0.317581
348	0.270264	0.369476	0.275711	0.331421
350	0.251816	0.389572	0.296875	0.360886
352	0.227829	0.392761	0.308228	0.38678
354	0.225723	0.431427	0.343918	0.428467
356	0.219589	0.446609	0.363724	0.463577
358	0.231186	0.496552	0.410751	0.514328
360	0.236267	0.510742	0.436798	0.545685
362	0.256226	0.557037	0.489868	0.585434
364	0.265137	0.558151	0.504974	0.586426
366	0.289963	0.607086	0.555038	0.620255
368	0.299866	0.60228	0.563446	0.632248
370	0.325943	0.645767	0.615494	0.662674
372	0.335388	0.63237	0.61441	0.662323
374	0.363281	0.672394	0.656006	0.692703
376	0.36618	0.658707	0.64238	0.701385
378	0.385223	0.696548	0.685715	0.73793
380	0.381897	0.673248	0.679077	0.731918
382	0.399094	0.691895	0.722107	0.742004
384	0.397964	0.65155	0.699173	0.715988
386	0.417084	0.659882	0.729706	0.716248
388	0.414291	0.613968	0.703644	0.676254
390	0.431641	0.593353	0.729279	0.62851
392	0.428345	0.510391	0.674164	0.539444
394	0.435501	0.443176	0.628799	0.444733
396	0.418381	0.362457	0.52948	0.346863
398	0.389664	0.309891	0.446426	0.280151
400	0.339783	0.252411	0.366699	0.221329
402	0.305817	0.215912	0.317657	0.175903
404	0.265854	0.164078	0.263977	0.128372
406	0.236084	0.12944	0.215714	0.095108
408	0.201904	0.10173	0.168869	0.0644836
410	0.168137	0.0783234	0.130081	0.0438538
412	0.121979	0.0505981	0.0881348	0.0291748
414	0.094696	0.0368042	0.0657654	0.0202179
416	0.0693359	0.025589	0.0473022	0.0138245
418	0.0529327	0.0200653	0.038208	0.00994873
420	0.0438843	0.0198059	0.0329285	0.00726318
422	0.0379333	0.0165253	0.0269775	0.00502014
424	0.0316315	0.0132751	0.0219574	0.00379944
426	0.0271149	0.0110931	0.0185242	0.00320435
428	0.0224152	0.0091095	0.0150452	0.00201416
430	0.018631	0.00787354	0.012207	0.00138855
432	0.0167694	0.00608826	0.0102386	0.000778198
434	0.0138245	0.00532532	0.00843811	0.000686646
436	0.0116882	0.00440979	0.0065918	0.000213623
438	0.0100403	0.003479	0.00537109	-0.000152588
440	0.00837708	0.00300598	0.00421143	-0.000167847
442	0.00724792	0.00222778	0.0032196	-0.000732422
444	0.00611877	0.00177002	0.00239563	-0.000747681
446	0.00526428	0.0012207	0.00178528	-0.000991821
448	0.00471497	0.000869751	0.001297	-0.00112915
450	0.00404358	0.000701904	0.000823975	-0.00125122
452	0.00364685	0.000366211	0.000411987	-0.00135803
454	0.00305176	0.000320435	0.000183105	-0.0012207
456	0.0027771	0.000198364	-3.05176e-05	-0.00154114
458	0.00231934	0.000106812	-0.000167847	-0.00160217
460	0.00228882	-0.000152588	-0.000259399	-0.00178528
462	0.00228882	-0.000305176	-0.000427246	-0.00183105
464	0.00151062	0.000106812	-0.000442505	-0.00193787
466	9.15527e-05	-0.000442505	-0.000564575	-0.00247192
468	0.00164795	-0.000473022	-0.000488281	-0.00219727
470	0.00184631	-0.000701904	-0.000778198	-0.00219727
472	0.00120544	-0.000335693	-0.000717163	-0.0020752
474	0.00128174	-0.000411987	-0.000900269	-0.00234985
476	0.00126648	-0.000564575	-0.00100708	-0.00268555
478	0.00114441	-0.000686646	-0.00115967	-0.00274658
480	0.000915527	-0.000396729	-0.00123596	-0.000793457
482	0.000991821	-0.000717163	-0.00108337	-0.00337219
484	0.000579834	-0.000549316	-0.00151062	-0.00354004
486	0.000732422	-6.10352e-05	-0.00189209	-0.00592041
488	0.00123596	-0.00112915	-0.00163269	-0.00430298
490	0.000747681	-0.000762939	-0.0014801	-0.00370789
492	0.000793457	-0.000534058	-0.00158691	-0.00352478
494	0.000869751	-0.000808716	-0.00169373	-0.0035553
496	0.000366211	-0.000610352	-0.00158691	-0.00378418
498	0.000564575	-0.000808716	-0.00166321	-0.00340271
500	0.000701904	-0.000793457	-0.00166321	-0.00354004
502	0.000473022	-0.00050354	-0.00177002	-0.0035553
504	0.000747681	-0.000701904	-0.00180054	-0.00378418
506	0.000564575	-0.000732422	-0.0018158	-0.00361633
508	0.000595093	-0.00062561	-0.00166321	-0.00349426
510	0.000289917	-0.000518799	-0.00177002	-0.00338745
512	0.000579834	-0.000579834	-0.00186157	-0.00115967
514	0.000595093	-0.000793457	-0.00183105	-0.00331116
516	0.000396729	-0.000274658	-0.00186157	-0.00323486
518	0.000167847	-0.000320435	-0.00183105	-0.00317383
520	0.000564575	-0.000564575	-0.00177002	-0.0032196
522	0.000534058	-0.000396729	-0.00195312	-0.00291443
524	0.000442505	-0.00038147	-0.00161743	-0.00326538
526	0.000518799	-0.000518799	-0.00154114	-0.00300598
528	0.000259399	-0.00038147	-0.00193787	-0.00292969
530	0.000579834	-0.000488281	-0.00175476	-0.00340271
532	0.000198364	-0.000213623	-0.00163269	-0.00292969
534	0.000106812	-0.000335693	-0.00175476	-0.00358582
536	0.000411987	-0.000671387	-0.00172424	-0.00364685
538	-0.000259399	-0.000213623	-0.00180054	-0.00363159
540	7.62939e-05	1.52588e-05	3.05176e-05	-0.00352478
542	-9.15527e-05	-0.00050354	-0.00186157	-0.00387573
544	0.000106812	-0.000350952	-0.0017395	-0.00384521
546	-6.10352e-05	-0.000595093	-0.00172424	-0.0035553
548	6.10352e-05	-0.000442505	-0.00186157	-0.00427246
550	0.000167847	-0.000717163	-0.0019989	-0.00398254
552	-0.000244141	-0.000350952	-0.00196838	-0.0035553
554	-4.57764e-05	-0.00062561	-0.00190735	-0.00389099
556	9.15527e-05	-0.000564575	-0.0019989	-0.00369263
558	0.000167847	-0.00100708	-0.00190735	-0.00390625
560	-0.000442505	-0.000244141	-0.00195312	-0.00357056
562	-1.52588e-05	-0.000747681	-0.00201416	-0.00440979
564	-0.000305176	-0.000564575	-0.00201416	-0.00395203
566	-0.000396729	-0.000579834	-0.00186157	-0.00395203
568	-0.000915527	-0.000350952	-0.0018158	-0.00393677
570	-0.000747681	-0.000549316	-0.00193787	-0.00471497
572	-0.00038147	-0.000534058	-0.00209045	-0.00543213
574	-0.000518799	-9.15527e-05	-0.0022583	-0.00546265
576	-6.10352e-05	-4.57764e-05	-0.00219727	-0.00444031
578	0.000106812	-0.000167847	-0.00250244	-0.00648499
580	-0.000701904	0.000335693	-0.00231934	-0.00479126
582	0.000350952	-0.000595093	-0.00242615	-0.00712585
584	-0.000717163	0.000213623	-0.00038147	-0.00521851
586	0.000411987	-0.00062561	-0.00245667	-0.00575256
588	4.57764e-05	-0.000717163	-0.00224304	-0.00544739
590	9.15527e-05	-0.00131226	-0.0020752	-0.00553894
592	-0.00109863	-0.000549316	-0.00184631	-0.00434875
594	-0.000244141	-0.00119019	-0.00141907	-0.00547791
596	3.05176e-05	-0.00120544	-0.00088501	-0.00488281
598	-0.000717163	-0.000839233	-0.00196838	-0.00445557
600	-0.000579834	-0.000671387	-0.000488281	-0.00508118
602	-0.000427246	-0.00111389	-0.00187683	-0.004776
604	-0.000152588	-0.00143433	-0.00209045	-0.00521851
606	-0.000579834	-0.00105286	-0.00267029	-0.00450134
608	4.57764e-05	-0.00119019	-0.00169373	-0.00384521
610	-0.00112915	-0.000427246	-0.00186157	-0.00526428
612	1.52588e-05	-0.00167847	-0.00198364	-0.00241089
614	-0.00012207	-0.000366211	-0.000854492	-0.00469971
616	0.000869751	-0.00180054	-0.00218201	-0.00431824
618	-0.00134277	-0.0012207	-0.00222778	-0.00447083
620	0	-0.000305176	-0.00157166	-0.00241089
622	-0.00149536	-3.05176e-05	-4.57764e-05	-0.00714111
624	0.00128174	-0.00123596	-0.00218201	-0.00279236
626	-0.000366211	0.000350952	-0.00216675	-0.00302124
628	-0.00187683	-0.000457764	-0.00222778	-0.00697327
630	-0.00123596	0	-3.05176e-05	-0.00660706
632	0.000427246	-0.00218201	-0.00192261	-0.00384521
634	0.000534058	-0.000823975	-0.00215149	-0.00300598
636	-0.000762939	-0.000411987	-0.00196838	-0.0039978
638	-0.000213623	-0.00105286	-0.00219727	-0.00531006
640	-0.000640869	-0.000747681	-0.00196838	-0.00498962
642	3.05176e-05	-0.00178528	-0.00233459	-0.00440979
644	-7.62939e-05	-0.000823975	-0.00183105	-0.00422668
646	-0.000564575	-0.00123596	-0.00209045	-0.00436401
648	-0.001297	0.000228882	-0.00172424	-0.00318909
650	-6.10352e-05	-0.00172424	-0.00204468	-9.15527e-05
652	-0.00128174	-0.00228882	-0.00178528	-0.00778198
654	0.00134277	-0.00270081	-0.00141907	-0.00900269
656	-0.00695801	-0.0045166	0.0012207	-0.0130157
658	-0.000183105	-0.000488281	-0.00280762	-0.00436401
660	-0.00270081	-0.0050354	-0.00221252	-0.00895691
662	0.00177002	-0.00170898	-0.00189209	-0.00370789
664	-0.000518799	0.000610352	-0.00198364	-0.00332642
666	-0.00117493	-0.00216675	-0.00239563	-0.00605774
668	0.000289917	-0.000350952	-0.00192261	-0.00302124
670	-0.001297	-0.000762939	-0.00215149	-0.00506592
672	-0.000640869	0.000228882	-0.00189209	-0.00393677
674	3.05176e-05	-0.0018158	-0.00236511	-0.00498962
676	-0.000869751	3.05176e-05	-0.00212097	-0.00421143
678	-0.000137329	-0.000717163	-0.00205994	-0.00384521
680	-0.00274658	-0.00038147	-0.00218201	-0.00508118
682	4.57764e-05	-0.000823975	-0.00222778	-0.00401306
684	-0.00613403	-0.00119019	-0.00205994	-0.00344849
686	0.00378418	-0.00473022	-0.00265503	-0.00157166
688	0.00234985	0.00479126	-0.00190735	-0.0104218
690	-0.00743103	0.000701904	-0.00196838	-0.00302124
692	-0.00318909	-0.00317383	-0.000228882	0.00257874
694	0.00115967	-0.00682068	-0.00279236	-0.00177002
696	0.00578308	-0.00257874	-0.00233459	-0.00805664
698	0.00389099	0.00222778	-0.00233459	-0.0124817
700	0.00140381	0.00546265	-0.00198364	-0.00782776

## Sheet: Me UV New
	Instrument: HP Diode Array	Instrument: HP Diode Array	Instrument: HP Diode Array	Instrument: HP Diode Array
	Collection mode: Scan	Collection mode: Scan	Collection mode: Scan	Collection mode: Scan
	Number of points: 255	Number of points: 255	Number of points: 255	Number of points: 255
	Monochromator = 190 to 700 nm	Monochromator = 190 to 700 nm	Monochromator = 190 to 700 nm	Monochromator = 190 to 700 nm
	Timing mode: Constant Time	Timing mode: Constant Time	Timing mode: Constant Time	Timing mode: Constant Time
	Integration Time: 2.5 sec.	Integration Time: 2.5 sec.	Integration Time: 2.5 sec.	Integration Time: 2.5 sec.
	Apply Reference: True	Apply Reference: True	Apply Reference: True	Apply Reference: True
	Active DCDevices: HPDA (red)	Active DCDevices: HPDA (red)	Active DCDevices: HPDA (red)	Active DCDevices: HPDA (red)
	Reduction mode: Absorbance	Reduction mode: Absorbance	Reduction mode: Absorbance	Reduction mode: Absorbance
	Scan mode: Fixed Slitwidth and HV(s)	Scan mode: Fixed Slitwidth and HV(s)	Scan mode: Fixed Slitwidth and HV(s)	Scan mode: Fixed Slitwidth and HV(s)
	(HPDA, Slit width = _______ mm (manual))	(HPDA, Slit width = _______ mm (manual))	(HPDA, Slit width = _______ mm (manual))	(HPDA, Slit width = _______ mm (manual))
	Total Elapsed Time = 0:04.0 (min:sec)	Total Elapsed Time = 0:03.9 (min:sec)	Total Elapsed Time = 0:03.9 (min:sec)	Total Elapsed Time = 0:03.9 (min:sec)
Wavelength	5Me	5,6 dMe	7Me	unsub
190	0.142014	0.0733795	0.075882	1.47118
192	0.711548	0.760635	0.67746	1.55634
194	0.745407	0.84465	0.709091	2.3958
196	1.06747	1.15199	1.04063	1.98669
198	0.99205	1.10065	0.98732	2.63919
200	1.06331	1.10855	0.923218	2.157
202	1.27003	1.39108	1.2812	3.00697
204	0.917709	0.92836	0.797363	2.35785
206	1.11023	1.02336	0.940201	3.0802
208	0.721527	0.706436	0.66124	2.30661
210	0.740448	0.690384	0.684433	2.30542
212	0.57579	0.543304	0.535629	1.59459
214	0.615143	0.552368	0.55629	1.37444
216	0.519012	0.463165	0.464951	1.09685
218	0.585037	0.493988	0.514465	0.975998
220	0.504089	0.436829	0.442352	0.841812
222	0.569366	0.480453	0.480057	0.78923
224	0.504715	0.441132	0.419693	0.715439
226	0.537292	0.464783	0.427826	0.683182
228	0.476395	0.422928	0.372528	0.625031
230	0.452454	0.407349	0.34407	0.593262
232	0.404327	0.37149	0.311356	0.555573
234	0.399673	0.367996	0.310623	0.538101
236	0.378326	0.354111	0.295807	0.512802
238	0.397415	0.375916	0.305878	0.513885
240	0.398819	0.379913	0.302704	0.514587
242	0.443405	0.411713	0.326401	0.529877
244	0.450653	0.413223	0.327408	0.529831
246	0.528366	0.468307	0.377289	0.551941
248	0.534454	0.462784	0.380386	0.557358
250	0.587921	0.487625	0.406219	0.558563
252	0.542358	0.445847	0.365387	0.5298
254	0.568436	0.454269	0.3685	0.511444
256	0.541443	0.437973	0.351257	0.494293
258	0.567032	0.465668	0.365891	0.494217
260	0.541702	0.458221	0.356934	0.478577
262	0.551712	0.471268	0.367981	0.47374
264	0.515564	0.446259	0.354034	0.463776
266	0.509979	0.442093	0.355026	0.449631
268	0.4664	0.411163	0.331207	0.430511
270	0.452362	0.404175	0.323074	0.407562
272	0.401505	0.366074	0.293777	0.387039
274	0.380783	0.352753	0.286591	0.371033
276	0.33049	0.315704	0.260773	0.355545
278	0.329208	0.325424	0.273712	0.346893
280	0.295212	0.303024	0.256927	0.329895
282	0.294373	0.313553	0.26712	0.321747
284	0.271225	0.302567	0.259018	0.309647
286	0.279495	0.322601	0.278824	0.308914
288	0.255371	0.30661	0.26503	0.301697
290	0.271591	0.332352	0.288635	0.302963
292	0.274002	0.335068	0.295212	0.305801
294	0.299225	0.366684	0.326172	0.317856
296	0.311966	0.379456	0.340179	0.329498
298	0.34848	0.420547	0.375214	0.347778
300	0.369156	0.442245	0.387054	0.36528
302	0.412415	0.491898	0.418167	0.392746
304	0.435867	0.511566	0.428757	0.417252
306	0.484467	0.562027	0.468002	0.453949
308	0.511337	0.577072	0.489075	0.488281
310	0.578003	0.648438	0.543213	0.533005
312	0.615646	0.684235	0.562988	0.554642
314	0.699677	0.787979	0.609924	0.573776
316	0.724014	0.828354	0.604599	0.570786
318	0.804352	0.9496	0.636749	0.584152
320	0.790649	0.936905	0.618866	0.586914
322	0.860367	1.03273	0.662003	0.613831
324	0.826416	0.965683	0.652237	0.611923
326	0.907959	1.05956	0.706741	0.627411
328	0.870636	0.994949	0.677155	0.599747
330	0.968994	1.13853	0.699661	0.567795
332	0.902481	1.06079	0.622894	0.511948
334	0.968338	1.21634	0.594223	0.453537
336	0.851974	1.06525	0.498016	0.386505
338	0.850082	1.11826	0.451431	0.345886
340	0.713303	0.918457	0.378616	0.314316
342	0.664978	0.874115	0.351791	0.306808
344	0.552307	0.712494	0.314865	0.303665
346	0.505508	0.65242	0.313217	0.317581
348	0.427765	0.549316	0.301819	0.331421
350	0.401123	0.520905	0.321198	0.360886
352	0.363678	0.474304	0.329239	0.38678
354	0.366684	0.484924	0.364761	0.428467
356	0.359604	0.4729	0.383408	0.463577
358	0.385162	0.50473	0.43158	0.514328
360	0.394287	0.505188	0.453827	0.545685
362	0.430893	0.543274	0.505463	0.585434
364	0.440094	0.54425	0.516541	0.586426
366	0.481598	0.591125	0.567551	0.620255
368	0.489761	0.59024	0.573349	0.632248
370	0.533997	0.635086	0.626068	0.662674
372	0.538788	0.625443	0.620987	0.662323
374	0.580246	0.669952	0.663528	0.692703
376	0.575134	0.660248	0.650879	0.701385
378	0.613953	0.705322	0.698715	0.73793
380	0.608765	0.686722	0.691284	0.731918
382	0.64859	0.718719	0.734985	0.742004
384	0.636749	0.691864	0.711899	0.715988
386	0.672165	0.717285	0.747879	0.716248
388	0.657776	0.672607	0.723343	0.676254
390	0.687195	0.654556	0.743637	0.62851
392	0.654388	0.562485	0.673325	0.539444
394	0.641098	0.496857	0.614502	0.444733
396	0.561768	0.417892	0.511093	0.346863
398	0.50322	0.359558	0.433624	0.280151
400	0.431305	0.316132	0.361862	0.221329
402	0.396469	0.276733	0.318069	0.175903
404	0.344879	0.214493	0.264023	0.128372
406	0.313553	0.166122	0.21225	0.095108
408	0.26445	0.127441	0.163208	0.0644836
410	0.222519	0.0963135	0.124222	0.0438538
412	0.171921	0.0627289	0.0832977	0.0291748
414	0.138184	0.0458069	0.0622253	0.0202179
416	0.1082	0.0322418	0.0446625	0.0138245
418	0.095459	0.0266876	0.0348969	0.00994873
420	0.0725403	0.0231934	0.0317993	0.00726318
422	0.0682983	0.0184631	0.0258942	0.00502014
424	0.0565491	0.0144653	0.0207825	0.00379944
426	0.0485992	0.0112762	0.0172882	0.00320435
428	0.0409088	0.00836182	0.0137024	0.00201416
430	0.035965	0.00614929	0.0110779	0.00138855
432	0.0268402	0.00405884	0.00849915	0.000778198
434	0.0233154	0.00263977	0.00662231	0.000686646
436	0.018158	0.0015564	0.00479126	0.000213623
438	0.0142975	0.000457764	0.00331116	-0.000152588
440	0.0108795	-0.000213623	0.00218201	-0.000167847
442	0.00823975	-0.00106812	0.00114441	-0.000732422
444	0.00596619	-0.00149536	0.000305176	-0.000747681
446	0.00372314	-0.00196838	-0.000244141	-0.000991821
448	0.00177002	-0.00221252	-0.000991821	-0.00112915
450	0.000427246	-0.00242615	-0.00115967	-0.00125122
452	-0.00062561	-0.00265503	-0.00134277	-0.00135803
454	-0.00108337	-0.00279236	-0.00157166	-0.0012207
456	-0.00125122	-0.00292969	-0.00172424	-0.00154114
458	-0.000595093	-0.00297546	-0.00158691	-0.00160217
460	-0.00164795	-0.00314331	-0.00193787	-0.00178528
462	-0.00253296	-0.00335693	-0.00204468	-0.00183105
464	-0.000366211	-0.00302124	-0.00183105	-0.00193787
466	-0.00190735	-0.00238037	-1.52588e-05	-0.00247192
468	-0.00195312	-0.0030365	-0.00201416	-0.00219727
470	-0.00415039	-0.00350952	-0.00216675	-0.00219727
472	-0.00166321	-0.00326538	-0.0020752	-0.0020752
474	-0.00216675	-0.00340271	-0.00196838	-0.00234985
476	-0.00230408	-0.00340271	-0.00192261	-0.00268555
478	-3.05176e-05	-0.00344849	-0.00198364	-0.00274658
480	-0.00132751	-0.00331116	-0.00180054	-0.000793457
482	-0.0018158	-0.00344849	-0.00183105	-0.00337219
484	-0.000747681	-0.0035553	-0.00143433	-0.00354004
486	7.62939e-05	-0.00515747	0.000396729	-0.00592041
488	-0.00291443	-0.00387573	-0.00166321	-0.00430298
490	-0.00193787	-0.00352478	-0.00170898	-0.00370789
492	-0.00233459	-0.00338745	-0.00157166	-0.00352478
494	-0.00276184	-0.00349426	-0.0014801	-0.0035553
496	-0.00111389	-0.00337219	-0.00149536	-0.00378418
498	-0.00216675	-0.00326538	-0.00158691	-0.00340271
500	-0.00219727	-0.00349426	-0.00128174	-0.00354004
502	-0.00151062	-0.003479	-0.00115967	-0.0035553
504	-0.00227356	-0.00343323	-0.00125122	-0.00378418
506	-0.00271606	-0.00334167	-0.0012207	-0.00361633
508	-0.00263977	-0.00334167	-0.000900269	-0.00349426
510	-0.00164795	-0.00309753	-0.000991821	-0.00338745
512	-0.00263977	-0.00349426	-0.000839233	-0.00115967
514	-4.57764e-05	-0.00344849	-0.00111389	-0.00331116
516	-0.00241089	-0.00311279	-0.000930786	-0.00323486
518	-0.0025177	-0.00337219	-0.000793457	-0.00317383
520	-0.00343323	-0.00340271	-0.000747681	-0.0032196
522	-0.00354004	-0.00334167	-0.000732422	-0.00291443
524	-0.00280762	-0.00309753	-0.000778198	-0.00326538
526	-0.00260925	-0.00334167	-0.000534058	-0.00300598
528	-0.00234985	-0.00308228	-0.000320435	-0.00292969
530	-0.00331116	-0.00331116	-0.000747681	-0.00340271
532	-0.00169373	-0.00325012	-0.000366211	-0.00292969
534	-0.00170898	-0.00317383	-0.00050354	-0.00358582
536	-0.00335693	-0.00349426	-0.000564575	-0.00364685
538	-0.00109863	-0.00325012	-0.000411987	-0.00363159
540	-0.00108337	0	-0.000656128	-0.00352478
542	-0.00108337	-0.00354004	-0.000579834	-0.00387573
544	-0.00202942	-0.00354004	-0.000473022	-0.00384521
546	-0.00228882	-0.00344849	-0.000656128	-0.0035553
548	-0.00209045	-0.00361633	-0.000457764	-0.00427246
550	-0.00314331	-0.00361633	-0.000640869	-0.00398254
552	-0.00169373	-0.00337219	-0.000305176	-0.0035553
554	-0.0020752	-0.00357056	-0.000442505	-0.00389099
556	-0.00276184	-0.0037384	-0.000366211	-0.00369263
558	-0.00369263	-0.00341797	-0.000473022	-0.00390625
560	-0.00112915	-0.00335693	-0.000244141	-0.00357056
562	-0.00335693	-0.0038147	-0.000564575	-0.00440979
564	-0.00248718	-0.00354004	-0.000320435	-0.00395203
566	-0.00140381	-0.00367737	-0.00050354	-0.00395203
568	0.000579834	-0.00369263	-0.00038147	-0.00393677
570	0.00012207	-0.00372314	-0.000442505	-0.00471497
572	-0.00123596	-0.00410461	0	-0.00543213
574	-0.000976562	-0.00389099	0.000579834	-0.00546265
576	-0.00196838	-0.00431824	0.000869751	-0.00444031
578	-0.00326538	-0.00480652	0.00146484	-0.00648499
580	-0.00050354	-0.00495911	0.00172424	-0.00479126
582	-0.00523376	-0.00631714	0.00204468	-0.00712585
584	-0.000396729	-0.00445557	0.0012207	-0.00521851
586	-0.0027771	-0.00476074	0.000839233	-0.00575256
588	-0.00379944	-0.00427246	0.000259399	-0.00544739
590	-0.0038147	-0.00419617	-0.000808716	-0.00553894
592	0.000427246	-0.00358582	-0.000549316	-0.00434875
594	-0.00331116	-0.00418091	-0.000747681	-0.00547791
596	-0.00360107	-0.0042572	-0.000717163	-0.00488281
598	-0.00131226	-0.0038147	-0.000564575	-0.00445557
600	-0.00219727	-0.00402832	-0.000549316	-0.00508118
602	-0.00224304	-0.0040741	-0.000717163	-0.004776
604	-0.0037384	-0.00422668	-0.000930786	-0.00521851
606	-0.0025177	-0.00367737	-0.00126648	-0.00450134
608	-0.00309753	-0.0043335	-0.000289917	-0.00384521
610	-0.000762939	-0.00370789	-0.000320435	-0.00526428
612	-0.0032959	-0.00436401	-0.000900269	-0.00241089
614	-0.00135803	-0.00390625	-0.000213623	-0.00469971
616	-0.00434875	-0.00422668	-0.000656128	-0.00431824
618	-0.00460815	-0.00450134	-0.000610352	-0.00447083
620	-0.00210571	-0.003479	0.000244141	-0.00241089
622	-0.00283813	-0.00445557	0	-0.00714111
624	-0.00245667	-0.00337219	0.000396729	-0.00279236
626	-0.00238037	-0.003479	0.000320435	-0.00302124
628	-0.00422668	-0.00454712	-0.000564575	-0.00697327
630	-0.00611877	-0.00509644	-4.57764e-05	-0.00660706
632	-0.00456238	-0.00408936	-0.000473022	-0.00384521
634	-0.00268555	-0.00358582	0.000335693	-0.00300598
636	-0.001297	-0.00372314	-1.52588e-05	-0.0039978
638	-0.00332642	-0.00386047	-0.000350952	-0.00531006
640	-0.00421143	-0.00411987	-7.62939e-05	-0.00498962
642	-0.00439453	-0.00439453	-0.000442505	-0.00440979
644	-0.00239563	-0.00357056	0.000259399	-0.00422668
646	-0.00370789	-0.00415039	-0.000259399	-0.00436401
648	0.0017395	-0.00285339	0.000534058	-0.00318909
650	-0.00524902	-0.00479126	-0.000488281	-9.15527e-05
652	-0.00344849	-0.00489807	-0.000915527	-0.00778198
654	0.00421143	-0.00334167	0.000808716	-0.00900269
656	0.00946045	-0.0140839	-0.00315857	-0.0130157
658	-0.00534058	-0.00520325	-0.000137329	-0.00436401
660	-0.0143127	-0.00650024	-0.00392151	-0.00895691
662	-0.000946045	-0.00331116	0.000259399	-0.00370789
664	4.57764e-05	-0.00352478	0.000686646	-0.00332642
666	-0.00752258	-0.00514221	-0.000564575	-0.00605774
668	6.10352e-05	-0.00352478	0.00109863	-0.00302124
670	-0.00300598	-0.00408936	0.000137329	-0.00506592
672	0.00062561	-0.00323486	0.00105286	-0.00393677
674	-0.00622559	-0.00431824	-0.000137329	-0.00498962
676	-0.00209045	-0.0038147	0.000213623	-0.00421143
678	0.000335693	-0.00341797	0.000900269	-0.00384521
680	-0.00602722	-0.00466919	-0.000274658	-0.00508118
682	0.00338745	-0.00259399	0.00209045	-0.00401306
684	-0.00895691	-0.00540161	-0.00196838	-0.00344849
686	0.00231934	-0.00291443	0.0012207	-0.00157166
688	0.00421143	-0.00254822	0.00291443	-0.0104218
690	-0.0158234	-0.00679016	-0.00247192	-0.00302124
692	-0.0150452	-0.00646973	-0.00308228	0.00257874
694	-0.00360107	-0.00415039	-0.000411987	-0.00177002
696	0.0131683	-0.00115967	0.00328064	-0.00805664
698	0.0131073	-0.000808716	0.00494385	-0.0124817
700	0.00131226	-0.0030365	0.00248718	-0.00782776

## Sheet: OH UV New
	Instrument: HP Diode Array	Instrument: HP Diode Array	Instrument: HP Diode Array	Instrument: HP Diode Array	Instrument: HP Diode Array
	Collection mode: Scan	Collection mode: Scan	Collection mode: Scan	Collection mode: Scan	Collection mode: Scan
	Number of points: 255	Number of points: 255	Number of points: 255	Number of points: 255	Number of points: 255
	Monochromator = 190 to 700 nm	Monochromator = 190 to 700 nm	Monochromator = 190 to 700 nm	Monochromator = 190 to 700 nm	Monochromator = 190 to 700 nm
	Timing mode: Constant Time	Timing mode: Constant Time	Timing mode: Constant Time	Timing mode: Constant Time	Timing mode: Constant Time
	Integration Time: 2.5 sec.	Integration Time: 2.5 sec.	Integration Time: 2.5 sec.	Integration Time: 2.5 sec.	Integration Time: 2.5 sec.
	Apply Reference: True	Apply Reference: True	Apply Reference: True	Apply Reference: True	Apply Reference: True
	Active DCDevices: HPDA (red)	Active DCDevices: HPDA (red)	Active DCDevices: HPDA (red)	Active DCDevices: HPDA (red)	Active DCDevices: HPDA (red)
	Reduction mode: Absorbance	Reduction mode: Absorbance	Reduction mode: Absorbance	Reduction mode: Absorbance	Reduction mode: Absorbance
	Scan mode: Fixed Slitwidth and HV(s)	Scan mode: Fixed Slitwidth and HV(s)	Scan mode: Fixed Slitwidth and HV(s)	Scan mode: Fixed Slitwidth and HV(s)	Scan mode: Fixed Slitwidth and HV(s)
	(HPDA, Slit width = _______ mm (manual))	(HPDA, Slit width = _______ mm (manual))	(HPDA, Slit width = _______ mm (manual))	(HPDA, Slit width = _______ mm (manual))	(HPDA, Slit width = _______ mm (manual))
	Total Elapsed Time = 0:03.9 (min:sec)	Total Elapsed Time = 0:03.9 (min:sec)	Total Elapsed Time = 0:03.9 (min:sec)	Total Elapsed Time = 0:03.9 (min:sec)	Total Elapsed Time = 0:03.9 (min:sec)
Wavelength	4OH	6OH	6OH4Me	6OH7Me	unsub
190	0.118683	0.0101624	0.0244446	-0.0128222	1.47118
192	0.191391	0.649704	0.665863	0.389867	1.55634
194	-0.0093689	0.790451	0.759003	0.58913	2.3958
196	0.531631	0.859406	1.07779	0.635015	1.98669
198	0.00260925	1.06641	1.03827	0.577567	2.63919
200	0.534119	0.738037	1.14862	0.483183	2.157
202	0.0206757	0.979065	1.29962	0.386702	3.00697
204	0.54686	0.638824	1.04538	0.34094	2.35785
206	0.433777	0.695236	1.32025	0.269804	3.0802
208	0.497681	0.548096	0.847946	0.255247	2.30661
210	0.82193	0.553619	0.876465	0.218849	2.30542
212	0.446152	0.459335	0.663345	0.201181	1.59459
214	0.816849	0.466263	0.682648	0.17999	1.37444
216	0.39119	0.386169	0.54509	0.170073	1.09685
218	0.753418	0.399933	0.576843	0.16014	0.975998
220	0.351028	0.347717	0.486343	0.153876	0.841812
222	0.970673	0.373276	0.519119	0.149539	0.78923
224	0.320984	0.340652	0.457153	0.149213	0.715439
226	0.582794	0.36084	0.47316	0.146498	0.683182
228	0.329391	0.339798	0.430328	0.144661	0.625031
230	0.44136	0.338303	0.42189	0.142262	0.593262
232	0.31604	0.32164	0.389252	0.142853	0.555573
234	0.392456	0.326141	0.385284	0.140944	0.538101
236	0.299225	0.312103	0.358292	0.138618	0.512802
238	0.35881	0.321472	0.35556	0.13897	0.513885
240	0.262283	0.309418	0.328659	0.142647	0.514587
242	0.304977	0.323578	0.331207	0.144651	0.529877
244	0.224106	0.315872	0.312393	0.145605	0.529831
246	0.28476	0.346176	0.332428	0.142378	0.551941
248	0.21608	0.323074	0.300964	0.136741	0.557358
250	0.267868	0.326263	0.298325	0.128731	0.558563
252	0.194214	0.289597	0.262299	0.12083	0.5298
254	0.223663	0.289749	0.259995	0.117113	0.511444
256	0.175674	0.271942	0.244675	0.119037	0.494293
258	0.203796	0.277557	0.251144	0.121806	0.494217
260	0.173141	0.26796	0.245316	0.124587	0.478577
262	0.194824	0.269714	0.248764	0.123989	0.47374
264	0.16655	0.25235	0.235031	0.119869	0.463776
266	0.180145	0.244705	0.229507	0.111458	0.449631
268	0.153717	0.223846	0.212524	0.102623	0.430511
270	0.175354	0.213013	0.206161	0.0953397	0.407562
272	0.154007	0.19072	0.189514	0.0908855	0.387039
274	0.182938	0.181427	0.187286	0.087781	0.371033
276	0.158264	0.163818	0.176147	0.0881923	0.355545
278	0.198334	0.178604	0.196289	0.0912672	0.346893
280	0.169479	0.172165	0.191345	0.0964258	0.329895
282	0.220764	0.18222	0.205124	0.102251	0.321747
284	0.193466	0.180649	0.206619	0.11108	0.309647
286	0.254745	0.193069	0.226135	0.119305	0.308914
288	0.229584	0.17865	0.21373	0.126889	0.301697
290	0.290329	0.193207	0.228348	0.132626	0.302963
292	0.261673	0.197952	0.22731	0.138278	0.305801
294	0.311798	0.217407	0.242798	0.143498	0.317856
296	0.281708	0.224075	0.24823	0.150568	0.329498
298	0.327301	0.242691	0.269974	0.15941	0.347778
300	0.300644	0.25174	0.280991	0.169897	0.36528
302	0.345764	0.275803	0.306564	0.178632	0.392746
304	0.32341	0.292313	0.318329	0.187095	0.417252
306	0.366623	0.326019	0.344452	0.194935	0.453949
308	0.340591	0.347733	0.355896	0.204891	0.488281
310	0.378845	0.387497	0.385986	0.216224	0.533005
312	0.34639	0.410477	0.40155	0.231971	0.554642
314	0.381897	0.459885	0.442581	0.250284	0.573776
316	0.343338	0.48642	0.463211	0.272279	0.570786
318	0.382874	0.54715	0.513824	0.290349	0.584152
320	0.342926	0.568054	0.528976	0.308102	0.586914
322	0.388855	0.633423	0.583069	0.321669	0.613831
324	0.342697	0.638123	0.585495	0.334946	0.611923
326	0.37413	0.704834	0.638794	0.344495	0.627411
328	0.309891	0.694275	0.627487	0.355802	0.599747
330	0.320236	0.76474	0.682434	0.364795	0.567795
332	0.250641	0.738266	0.65863	0.376502	0.511948
334	0.242813	0.808411	0.710449	0.381585	0.453537
336	0.187073	0.763153	0.672424	0.386711	0.386505
338	0.184387	0.82196	0.71431	0.385393	0.345886
340	0.149231	0.76059	0.667374	0.383453	0.314316
342	0.156921	0.802414	0.695251	0.376239	0.306808
344	0.138718	0.733047	0.643036	0.370734	0.303665
346	0.15419	0.759033	0.662766	0.361897	0.317581
348	0.143402	0.692764	0.611877	0.356303	0.331421
350	0.162918	0.70575	0.623474	0.347652	0.360886
352	0.156784	0.643661	0.57637	0.340904	0.38678
354	0.178192	0.650909	0.584549	0.334183	0.428467
356	0.174927	0.599396	0.546616	0.333491	0.463577
358	0.203079	0.603821	0.557877	0.331051	0.514328
360	0.202057	0.562119	0.52858	0.3332	0.545685
362	0.238541	0.568069	0.541595	0.334733	0.585434
364	0.237137	0.536148	0.516785	0.335955	0.586426
366	0.284454	0.547272	0.534515	0.33149	0.620255
368	0.278015	0.508606	0.501328	0.323773	0.632248
370	0.323868	0.501755	0.49791	0.311611	0.662674
372	0.315475	0.457291	0.453934	0.296862	0.662323
374	0.365585	0.445465	0.440399	0.273565	0.692703
376	0.349792	0.401886	0.398132	0.246683	0.701385
378	0.401886	0.374298	0.372925	0.214296	0.73793
380	0.386353	0.321014	0.32106	0.1782	0.731918
382	0.438446	0.284119	0.282394	0.143174	0.742004
384	0.419754	0.240692	0.238892	0.112783	0.715988
386	0.475983	0.219711	0.220703	0.0877007	0.716248
388	0.453949	0.20015	0.191742	0.0695889	0.676254
390	0.505188	0.181778	0.171738	0.0558343	0.62851
392	0.46463	0.161423	0.151199	0.0457395	0.539444
394	0.489685	0.146698	0.135452	0.0369136	0.444733
396	0.435837	0.129913	0.117691	0.0288724	0.346863
398	0.437622	0.114426	0.10054	0.0230695	0.280151
400	0.381332	0.0989685	0.0837097	0.018883	0.221329
402	0.362595	0.0979004	0.0804291	0.0156862	0.175903
404	0.294052	0.0902863	0.0716705	0.0134951	0.128372
406	0.263123	0.0787201	0.0587769	0.0117922	0.095108
408	0.206635	0.0787659	0.0574493	0.0110666	0.0644836
410	0.179077	0.0769501	0.054657	0.0105281	0.0438538
412	0.140137	0.0738983	0.0513611	0.010069	0.0291748
414	0.123413	0.0644684	0.0412445	0.00991404	0.0202179
416	0.100815	0.0671082	0.0440063	0.0105713	0.0138245
418	0.0914612	0.0668182	0.0424805	0.0111325	0.00994873
420	0.0784149	0.0586853	0.0346832	0.0115266	0.00726318
422	0.0626831	0.0650177	0.0409851	0.0116817	0.00502014
424	0.0540619	0.0601501	0.0361938	0.0124066	0.00379944
426	0.0642242	0.0513763	0.0336761	0.0124822	0.00320435
428	0.0478973	0.056488	0.0329437	0.012224	0.00201416
430	0.0628662	0.0579529	0.0343933	0.0119279	0.00138855
432	0.0444031	0.050705	0.0270538	0.0121258	0.000778198
434	0.0451965	0.0517883	0.028595	0.0120914	0.000686646
436	0.0430908	0.0488129	0.0266571	0.0118067	0.000213623
438	0.0459137	0.0471802	0.0252838	0.0116059	-0.000152588
440	0.057663	0.0444641	0.0235138	0.0120462	-0.000167847
442	0.0603485	0.0426025	0.0220947	0.0118102	-0.000732422
444	0.0599365	0.0399628	0.0206451	0.0118304	-0.000747681
446	0.0614929	0.0374908	0.0186005	0.0109549	-0.000991821
448	0.0606689	0.0340576	0.0163727	0.0100678	-0.00112915
450	0.0624237	0.0318298	0.0148468	0.00918961	-0.00125122
452	0.0616913	0.0291595	0.0130768	0.00886304	-0.00135803
454	0.0634613	0.0225677	0.00764465	0.00914615	-0.0012207
456	0.0626373	0.0203247	0.0110168	0.00936717	-0.00154114
458	0.0646973	0.0245361	0.0120544	0.0100808	-0.00160217
460	0.0634308	0.0216217	0.00973511	0.0114844	-0.00178528
462	0.0642395	0.0141907	0.00363159	0.0114888	-0.00183105
464	0.063385	0.0199738	0.0102692	0.0110472	-0.00193787
466	0.0643921	0.0160522	0.00688171	0.0104349	-0.00247192
468	0.0625305	0.0140228	0.00569153	0.0102411	-0.00219727
470	0.046875	0.00930786	0.00128174	0.0102836	-0.00219727
472	0.0583038	0.0108643	0.00418091	0.00998941	-0.0020752
474	0.0600739	0.0078125	0.00196838	0.0104564	-0.00234985
476	0.0576019	0.00688171	0.00160217	0.0114218	-0.00268555
478	0.056488	0.00553894	0.000946045	0.011787	-0.00274658
480	0.0538177	0.00559998	0.00169373	0.0123923	-0.000793457
482	0.0531006	0.00370789	0.000305176	0.0128597	-0.00337219
484	0.0507355	0.00434875	0.00161743	0.0133088	-0.00354004
486	0.0477905	0.00431824	0.00263977	0.0133732	-0.00592041
488	0.0457764	-0.000900269	-0.00300598	0.0127962	-0.00430298
490	0.0444946	0.000244141	-0.00154114	0.0124077	-0.00370789
492	0.041153	-0.00108337	-0.00260925	0.0119958	-0.00352478
494	0.0399323	-0.00219727	-0.003479	0.0117955	-0.0035553
496	0.0367279	7.62939e-05	-0.00109863	0.0117085	-0.00378418
498	0.0353241	-0.00167847	-0.00262451	0.0117321	-0.00340271
500	0.0315704	-0.00236511	-0.00332642	0.0118639	-0.00354004
502	0.0309601	-0.00126648	-0.0018158	-0.00115967	-0.0035553
504	0.0275726	-0.00294495	-0.00354004	-0.00125122	-0.00378418
506	0.0251617	-0.00360107	-0.00444031	-0.0012207	-0.00361633
508	0.0221405	-0.00335693	-0.00404358	-0.000900269	-0.00349426
510	0.0210724	-0.00195312	-0.00271606	-0.000991821	-0.00338745
512	0.0180817	-0.00341797	-0.00416565	-0.000839233	-0.00115967
514	0.00444031	-0.00378418	-0.00476074	-0.00111389	-0.00331116
516	0.0119629	-0.00341797	-0.00415039	-0.000930786	-0.00323486
518	0.0119629	-0.00338745	-0.00428772	-0.000793457	-0.00317383
520	0.0096283	-0.00489807	-0.0058136	-0.000747681	-0.0032196
522	0.00788879	-0.00489807	-0.00653076	-0.000732422	-0.00291443
524	0.00645447	-0.00408936	-0.00526428	-0.000778198	-0.00326538
526	0.00479126	-0.0035553	-0.0045166	-0.000534058	-0.00300598
528	0.00369263	-0.00340271	-0.00434875	-0.000320435	-0.00292969
530	0.00297546	-0.00469971	-0.00587463	-0.000747681	-0.00340271
532	0.00144958	-0.00224304	-0.0032959	-0.000366211	-0.00292969
534	0.000106812	-0.00228882	-0.0032196	-0.00050354	-0.00358582
536	0.000717163	-0.00442505	-0.00563049	-0.000564575	-0.00364685
538	0.000839233	-0.000946045	-0.00193787	-0.000411987	-0.00363159
540	0.000137329	-0.00250244	-0.00395203	-0.000656128	-0.00352478
542	7.62939e-05	-0.00187683	-0.00276184	-0.000579834	-0.00387573
544	-0.00134277	-0.00253296	-0.0037384	-0.000473022	-0.00384521
546	-0.00149536	-0.00279236	-0.00379944	-0.000656128	-0.0035553
548	-0.00140381	-0.00253296	-0.00363159	-0.000457764	-0.00427246
550	-0.00270081	-0.00448608	-0.00559998	-0.000640869	-0.00398254
552	-0.00282288	-0.00195312	-0.00323486	-0.000305176	-0.0035553
554	-0.00335693	-4.57764e-05	-0.000915527	-0.000442505	-0.00389099
556	-0.00350952	-0.00363159	-0.0045929	-0.000366211	-0.00369263
558	-0.00384521	-0.00466919	-0.00614929	-0.000473022	-0.00390625
560	-0.00405884	-0.00132751	-0.00259399	-0.000244141	-0.00357056
562	-0.00453186	-0.00427246	-0.00590515	-0.000564575	-0.00440979
564	-0.00445557	-0.00300598	-0.00427246	-0.000320435	-0.00395203
566	-0.00572205	-0.00167847	-0.00291443	-0.00050354	-0.00395203
568	-0.00419617	0.000976562	0.000137329	-0.00038147	-0.00393677
570	-0.00239563	0.000335693	-0.000350952	-0.000442505	-0.00471497
572	-0.00517273	-0.00144958	-0.00230408	0	-0.00543213
574	-0.00613403	-0.000930786	-0.00050354	0.000579834	-0.00546265
576	-0.00622559	-0.00256348	-0.00334167	0.000869751	-0.00444031
578	-0.00637817	-0.00431824	-0.00534058	0.00146484	-0.00648499
580	-0.0059967	-0.000259399	-0.00105286	0.00172424	-0.00479126
582	-0.00738525	-0.00743103	-0.00897217	0.00204468	-0.00712585
584	-0.0059967	-0.000305176	-0.00112915	0.0012207	-0.00521851
586	-0.00721741	-0.00688171	-0.00828552	0.000839233	-0.00575256
588	-0.0071106	-0.00531006	-0.00682068	0.000259399	-0.00544739
590	-0.00688171	-0.00543213	-0.00697327	-0.000808716	-0.00553894
592	-0.00590515	0.00106812	0.000213623	-0.000549316	-0.00434875
594	-0.00688171	-0.00440979	-0.00598145	-0.000747681	-0.00547791
596	-0.00683594	-0.00505066	-0.00671387	-0.000717163	-0.00488281
598	-0.00639343	-0.0014801	-0.00265503	-0.000564575	-0.00445557
600	-0.00622559	-0.00268555	-0.00419617	-0.000549316	-0.00508118
602	-0.00668335	-0.00302124	-0.00445557	-0.000717163	-0.004776
604	-0.00683594	-0.00518799	-0.00680542	-0.000930786	-0.00521851
606	-0.0065155	-0.00344849	-0.00424194	-0.00126648	-0.00450134
608	-0.00561523	-0.00439453	-0.00642395	-0.000289917	-0.00384521
610	-0.00566101	-0.000183105	-0.00115967	-0.000320435	-0.00526428
612	-0.00584412	-0.00469971	-0.00643921	-0.000900269	-0.00241089
614	-0.00553894	-0.00112915	-0.00180054	-0.000213623	-0.00469971
616	-0.00531006	-0.00418091	-0.00561523	-0.000656128	-0.00431824
618	-0.0052948	-0.00460815	-0.00715637	-0.000610352	-0.00447083
620	-0.00656128	-0.00166321	-0.00242615	0.000244141	-0.00241089
622	-0.0038147	-0.00386047	-0.00610352	0	-0.00714111
624	-0.00770569	0.00012207	-0.000167847	0.000396729	-0.00279236
626	-0.00453186	-0.00495911	-0.00637817	0.000320435	-0.00302124
628	-0.00172424	-0.00895691	-0.0105438	-0.000564575	-0.00697327
630	-0.0050354	-0.00917053	-0.0116577	-4.57764e-05	-0.00660706
632	-0.00758362	-0.00369263	-0.00517273	-0.000473022	-0.00384521
634	-0.00628662	-0.00254822	-0.00372314	0.000335693	-0.00300598
636	-0.00416565	-0.00198364	-0.00372314	-1.52588e-05	-0.0039978
638	-0.0045929	-0.00473022	-0.00621033	-0.000350952	-0.00531006
640	-0.00549316	-0.00648499	-0.00831604	-7.62939e-05	-0.00498962
642	-0.00692749	-0.00566101	-0.00761414	-0.000442505	-0.00440979
644	-0.00508118	-0.00273132	-0.00392151	0.000259399	-0.00422668
646	-0.00556946	-0.00523376	-0.00708008	-0.000259399	-0.00436401
648	-0.00392151	0.00280762	0.00161743	0.000534058	-0.00318909
650	-0.00444031	-0.00688171	-0.00878906	-0.000488281	-9.15527e-05
652	-0.00559998	-0.0015564	-0.00323486	-0.000915527	-0.00778198
654	-0.00660706	0.0153961	0.0166626	0.000808716	-0.00900269
656	0.00457764	0.00317383	0.0037384	-0.00315857	-0.0130157
658	0.00273132	-0.0166321	-0.0187836	-0.000137329	-0.00436401
660	-0.00663757	-0.0176697	-0.0210724	-0.00392151	-0.00895691
662	-0.00556946	0.00241089	0.00230408	0.000259399	-0.00370789
664	-0.00332642	-0.00274658	-0.00404358	0.000686646	-0.00332642
666	-0.00587463	-0.0096283	-0.012085	-0.000564575	-0.00605774
668	-0.00437927	0.00100708	0.000198364	0.00109863	-0.00302124
670	-0.00460815	-0.00410461	-0.00595093	0.000137329	-0.00506592
672	-0.00320435	0.000457764	-0.000930786	0.00105286	-0.00393677
674	0.000106812	-0.00741577	-0.00939941	-0.000137329	-0.00498962
676	-0.00305176	-0.00497437	-0.0065918	0.000213623	-0.00421143
678	-0.00386047	0.0025177	0.00163269	0.000900269	-0.00384521
680	-0.00454712	-0.0103149	-0.0132599	-0.000274658	-0.00508118
682	-0.00151062	0.00314331	0.00463867	0.00209045	-0.00401306
684	-0.00758362	-0.0101929	-0.013092	-0.00196838	-0.00344849
686	-0.000473022	0.0189209	0.0213013	0.0012207	-0.00157166
688	-0.00202942	-0.0157776	-0.0192719	0.00291443	-0.0104218
690	-0.0109711	-0.0270386	-0.0323792	-0.00247192	-0.00302124
692	-0.00497437	-0.000152588	-0.000732422	-0.00308228	0.00257874
694	0.00141907	0.0188599	0.0215302	-0.000411987	-0.00177002
696	0.00460815	0.0261536	0.0289307	0.00328064	-0.00805664
698	0.00100708	0.00848389	0.00836182	0.00494385	-0.0124817
700	-0.00886536	-0.0250244	-0.0301971	0.00248718	-0.00782776

## Sheet: Tabular ε Data
Aurone	ε	linear equation	R squared value	λmax
5F	17188	y = 17188x - 0.0091	1	394
6F	24252	y = 24252x - 0.0033	0.9999	370
4Cl	17129	y = 17129x - 0.0066	0.9999	390
5Cl	16551	y = 16551x - 0.0071	0.9999	394
6Cl	23187	y = 23187x - 0.0008	0.9999	378
7Cl	17247	y = 17247x + 0.004	1	386
5Br	15112	y = 15112x - 0.0032	0.9999	394
6Br	22435	y = 22435x + 0.0035	0.9999	378
7Br	22250	y = 22250x + 0.0022	0.9999	390
5Me	15470	y = 15470x + 0.0011	0.9999	390
5,6 dMe	19522	y = 19522x - 0.0016	0.9999	382
7Me	18380	y = 18380x - 0.0092	0.9999	386
4OH	22664	y = 22664x - 0.0579	0.9999	390
6OH	33050	y = 33050x - 0.0518	1	338
6OH4Me	30445	y = 30445x - 0.0263	0.9999	338
6OH7Me	will not dissolve			336
unsub	20208	y=20208x + 0.0052	1	382

[truncated: 5 more sheets: F ε,  Cl ε,  Br ε, Me ε, OH ε]
